# Supplementary material for: Standardised Resting Time Prior to Blood Sampling and Diurnal Variation Associated with Risk of Patient Misclassification: Results from Selected Biochemical Components
Source: PLoS One. 2015 Oct 13;10(10):e0140475. doi: 10.1371/journal.pone.0140475 (PMC4604193; doi:10.1371/journal.pone.0140475)
Supplement: S1 File — Data sets for the period from November 2011 to June 2014 (during opening hours: 7am–3pm). In-and exclusion criteria: Only patients who waited from 0–60 minutes were included and patients arriving for ECG-measurements were excluded. 1) Albumin, n = 42,399. Patients under the age of 15 years were excluded. 2) TSH, n = 20,019. Patients under the age of 20 were excluded. 3) Total calcium, n = 13,588. 4) Sodium, n = 51,917. (XLSX) [file pone.0140475.s001.xlsx]

## Sheet: Albumin
Albumin
Result (g/L)	Rest time (min)	Minutes after 7am	Age
43	0.0666667	199.1	87
44	0.1	293.8	49
41	0.1	199.6	79
39	0.133333	180.1	83
46	0.133333	224.033	83
42	0.166667	189.3	42
49	0.166667	164.4	47
43	0.2	404.2	55
44	0.2	160.633	62
45	0.2	160.633	62
45	0.2	343.067	69
43	0.2	359.967	73
47	0.2	328	76
46	0.233333	375.467	52
32	0.233333	331.2	66
33	0.233333	331.2	66
47	0.233333	407.067	69
43	0.233333	310	71
42	0.233333	118.4	74
45	0.233333	204.367	76
37	0.233333	234.3	79
44	0.233333	228.167	82
45	0.266667	198.367	64
46	0.266667	248	64
42	0.266667	178.733	71
37	0.266667	226.4	77
46	0.266667	169.933	79
41	0.266667	211.1	88
46	0.3	255.433	43
41	0.3	129.467	48
47	0.3	322.567	54
33	0.3	107.5	64
46	0.3	322.367	65
45	0.3	443.433	68
49	0.3	394.167	77
48	0.3	328.833	78
45	0.333333	102.733	64
43	0.333333	247.5	66
38	0.333333	142.8	74
40	0.333333	334.1	78
43	0.333333	266.967	81
38	0.333333	257.467	90
34	0.366667	44.7	40
48	0.366667	158.567	40
45	0.366667	250.933	48
46	0.366667	175.933	58
44	0.366667	129.533	64
43	0.366667	215.567	64
46	0.366667	13.4333	67
45	0.4	355.533	35
43	0.4	4.56667	41
45	0.4	385.967	64
44	0.4	148.5	66
46	0.4	175.8	66
40	0.4	321.833	67
45	0.4	193.767	70
47	0.4	90.7333	83
43	0.4	156.1	83
41	0.433333	345.433	58
48	0.433333	213.167	61
45	0.433333	86.2	63
45	0.433333	282.967	66
34	0.433333	282.867	67
46	0.433333	126.367	68
45	0.433333	170.5	68
47	0.433333	144.167	70
37	0.433333	324.167	75
43	0.433333	331.367	97
40	0.433333	306.633	99
43	0.466667	61.9333	27
46	0.466667	100.967	50
42	0.466667	122.2	66
37	0.466667	91.3667	69
43	0.466667	1.5	70
38	0.466667	132.167	74
40	0.466667	190.733	81
48	0.5	186.5	30
43	0.5	26.1667	63
47	0.5	402.733	65
45	0.5	331.7	68
41	0.5	336.367	71
45	0.5	133.967	80
46	0.5	352.667	82
45	0.5	468.8	84
48	0.533333	474.833	32
44	0.533333	210.5	35
45	0.533333	378.1	35
44	0.533333	326.267	48
44	0.533333	391.9	59
43	0.533333	121.1	63
46	0.533333	92	69
41	0.533333	162.633	71
38	0.533333	380.3	71
45	0.533333	52.5333	75
44	0.533333	187.233	77
45	0.533333	114.067	79
43	0.533333	307.233	80
41	0.533333	169.1	89
39	0.533333	323.567	96
46	0.566667	149.467	48
45	0.566667	386.6	49
42	0.566667	9.7	55
42	0.566667	17.5333	62
48	0.566667	245.1	63
45	0.566667	0.966667	65
47	0.566667	291.8	67
40	0.566667	43.1	68
41	0.566667	29.5333	69
40	0.566667	308.767	71
40	0.566667	213.167	72
48	0.566667	434.667	72
37	0.566667	358.067	73
44	0.566667	179.9	75
43	0.566667	180.4	75
43	0.566667	314.167	75
41	0.566667	212.267	76
41	0.566667	395.4	80
44	0.566667	175.567	83
43	0.6	400.067	30
46	0.6	132.733	32
48	0.6	122.067	36
35	0.6	224.333	47
43	0.6	25.8	48
43	0.6	77.0333	52
41	0.6	329.867	52
39	0.6	100.967	54
40	0.6	100.967	54
47	0.6	246.6	57
42	0.6	7.9	64
44	0.6	352.7	64
43	0.6	282.367	69
44	0.6	436.167	70
41	0.6	410.767	73
43	0.6	190.167	76
42	0.6	326.2	79
42	0.6	246.4	85
42	0.6	102.467	89
38	0.6	322.233	94
30	0.633333	149.333	18
45	0.633333	424.267	21
44	0.633333	262.2	27
45	0.633333	419.033	37
40	0.633333	445.567	37
45	0.633333	418.967	39
37	0.633333	165.2	50
37	0.633333	459	50
43	0.633333	377.967	52
46	0.633333	458.1	53
46	0.633333	120.867	58
47	0.633333	343.933	63
42	0.633333	281.333	67
44	0.633333	110.367	70
44	0.633333	434.933	73
40	0.633333	171.8	77
42	0.633333	14.5667	78
46	0.633333	130.2	81
43	0.633333	286.067	92
40	0.633333	365.967	94
48	0.666667	453.433	33
44	0.666667	403.533	48
47	0.666667	330.933	56
41	0.666667	104.467	58
43	0.666667	271.867	60
40	0.666667	172.167	63
44	0.666667	300.733	68
45	0.666667	172.2	69
41	0.666667	43.6667	77
43	0.666667	279.267	77
46	0.666667	375.7	79
41	0.666667	82.1333	82
45	0.666667	195.8	82
42	0.666667	71.0333	88
42	0.7	99.6	20
45	0.7	455.267	25
46	0.7	455.267	25
48	0.7	23	31
44	0.7	67.2667	35
47	0.7	348.267	40
46	0.7	44.9	48
45	0.7	211.967	54
46	0.7	435.2	59
46	0.7	332.067	60
36	0.7	263.8	61
35	0.7	0.8	63
46	0.7	413.267	65
42	0.7	166.267	67
40	0.7	72.4	68
45	0.7	463.433	69
42	0.7	135	73
41	0.7	89.1	74
36	0.7	254	77
36	0.7	291.467	79
41	0.7	272	82
44	0.7	106.7	88
39	0.7	188.4	90
51	0.733333	475.7	37
45	0.733333	329.433	43
46	0.733333	437.733	56
41	0.733333	60.3667	59
44	0.733333	315.933	59
62	0.733333	386.9	59
50	0.733333	281.667	62
48	0.733333	143.667	63
43	0.733333	242.2	63
45	0.733333	328.033	64
36	0.733333	78.9333	67
46	0.733333	240.733	74
43	0.733333	191.767	76
44	0.733333	217.833	78
40	0.766667	84.5	21
43	0.766667	376.067	23
42	0.766667	217.533	29
37	0.766667	337.133	42
45	0.766667	462.767	42
42	0.766667	229.733	49
44	0.766667	54.3667	50
45	0.766667	304.7	51
40	0.766667	93.1333	54
38	0.766667	404.367	55
43	0.766667	198.733	61
45	0.766667	136.133	68
40	0.766667	60.5333	71
44	0.766667	224.3	72
41	0.766667	162.233	74
41	0.766667	394.733	74
43	0.766667	347.4	78
40	0.766667	167.8	79
50	0.766667	270.567	84
45	0.766667	306.8	86
44	0.8	362.5	29
44	0.8	135.4	31
42	0.8	303.933	39
44	0.8	61.3667	45
44	0.8	138.367	47
43	0.8	186.833	48
43	0.8	48	49
43	0.8	149.767	59
45	0.8	117.833	60
44	0.8	0.3	61
44	0.8	176	67
43	0.8	431.967	67
41	0.8	223.4	69
47	0.8	336.567	70
44	0.8	211.967	73
41	0.8	321.9	73
45	0.8	223.733	75
44	0.8	230.133	76
44	0.8	59.2	83
40	0.8	350.333	85
39	0.833333	75.3667	26
45	0.833333	74.5	30
45	0.833333	428.767	30
46	0.833333	383.8	40
37	0.833333	61.7	49
41	0.833333	122.5	49
42	0.833333	92.4667	50
46	0.833333	454.733	55
44	0.833333	37.7333	58
46	0.833333	157.967	58
44	0.833333	221.9	59
44	0.833333	17.0667	60
43	0.833333	401.167	60
44	0.833333	196.967	61
45	0.833333	377.267	61
45	0.833333	348	64
45	0.833333	199.367	65
52	0.833333	302.867	65
44	0.833333	180.633	66
44	0.833333	279.667	68
46	0.833333	343.533	70
42	0.833333	10.1667	72
36	0.833333	204.767	72
42	0.833333	243.067	72
39	0.833333	116.133	73
40	0.833333	378.767	73
43	0.833333	474.367	73
42	0.833333	318.4	76
35	0.833333	315.533	82
42	0.833333	144.9	84
39	0.833333	263	84
46	0.833333	302.067	84
38	0.833333	346.033	85
37	0.866667	273.3	20
36	0.866667	226.667	28
44	0.866667	2	30
39	0.866667	151.5	31
44	0.866667	92.2333	32
46	0.866667	475.267	50
46	0.866667	38.6	51
43	0.866667	209.2	55
42	0.866667	273.1	57
37	0.866667	316.733	57
48	0.866667	412.1	57
44	0.866667	189.1	59
34	0.866667	2.76667	61
45	0.866667	171.167	61
46	0.866667	123.2	62
45	0.866667	412.533	66
44	0.866667	232.167	67
45	0.866667	232.667	67
42	0.866667	243.333	69
42	0.866667	53.9	73
45	0.866667	144.067	76
45	0.866667	314.133	77
42	0.866667	326.767	79
47	0.866667	344.9	80
41	0.866667	406.667	82
44	0.866667	290	84
47	0.866667	330.467	85
46	0.9	235.133	28
38	0.9	420.533	28
43	0.9	242.533	33
47	0.9	439.833	34
44	0.9	342.867	35
46	0.9	240.033	40
45	0.9	290.267	40
43	0.9	57.7	46
43	0.9	3.93333	47
43	0.9	69.2667	47
43	0.9	110.967	48
46	0.9	449.5	50
43	0.9	304.1	54
39	0.9	1.16667	55
38	0.9	43.3667	57
45	0.9	465.433	57
48	0.9	235	58
40	0.9	62.5	59
46	0.9	341.967	59
47	0.9	380.833	60
45	0.9	269.533	64
45	0.9	350.067	66
45	0.9	437.133	66
39	0.9	23.6667	67
41	0.9	102.533	67
34	0.9	57.9667	69
44	0.9	70.9667	70
46	0.9	296.767	70
43	0.9	436.1	70
43	0.9	318.467	72
45	0.9	302.7	73
46	0.9	200.133	75
43	0.9	86.3667	76
43	0.9	189.2	76
43	0.9	238.967	76
43	0.9	237.033	77
44	0.9	90.9	78
43	0.9	97.1667	78
46	0.9	300.167	78
46	0.9	203.867	79
46	0.9	136.867	83
41	0.9	414.067	84
40	0.9	122.3	86
42	0.9	274.933	90
41	0.933333	440.7	17
43	0.933333	69.6	27
46	0.933333	453	33
46	0.933333	16.3667	35
40	0.933333	251.7	36
43	0.933333	465.1	48
42	0.933333	122.7	60
44	0.933333	169.8	64
43	0.933333	175.533	66
45	0.933333	176.9	66
42	0.933333	315.533	66
44	0.933333	130.767	67
44	0.933333	186.267	67
44	0.933333	46.9333	68
43	0.933333	163.267	68
42	0.933333	377.7	70
49	0.933333	53.5	72
45	0.933333	247.5	72
44	0.933333	92.9667	73
45	0.933333	235.333	78
42	0.933333	368.433	78
36	0.933333	115.367	84
38	0.933333	298.767	84
38	0.933333	253.567	90
42	0.966667	469.033	19
41	0.966667	140.167	26
49	0.966667	283	28
38	0.966667	352.633	35
37	0.966667	26.0667	39
47	0.966667	322.967	40
47	0.966667	61.7333	41
47	0.966667	402.7	41
40	0.966667	62.3667	42
47	0.966667	276.1	44
41	0.966667	115.633	48
46	0.966667	322.133	49
43	0.966667	41.4333	51
46	0.966667	436.533	51
46	0.966667	472.067	53
45	0.966667	418.367	54
43	0.966667	52.4667	61
48	0.966667	120.233	61
45	0.966667	302.567	61
45	0.966667	353.467	61
43	0.966667	57.8333	62
41	0.966667	343.5	64
43	0.966667	140.6	65
40	0.966667	255.167	69
41	0.966667	255.167	69
38	0.966667	104.1	72
45	0.966667	183.5	72
40	0.966667	187.5	72
38	0.966667	84.7	73
39	0.966667	84.7	73
45	0.966667	275.333	73
40	0.966667	352.6	73
42	0.966667	391.7	73
46	0.966667	172.167	75
47	0.966667	327.567	75
33	0.966667	84.7667	79
44	0.966667	262.9	79
28	0.966667	307.767	79
43	0.966667	448.033	80
39	0.966667	308.5	81
43	0.966667	316.833	82
36	0.966667	331.9	83
48	0.966667	266.033	84
48	0.966667	271.5	86
42	0.966667	217.8	91
49	1	305.6	21
41	1	320.333	33
45	1	412.5	37
43	1	68.9	43
48	1	87.8333	47
43	1	232.333	48
42	1	183.5	51
46	1	214.233	51
43	1	83.7333	54
45	1	446.133	55
44	1	291	57
44	1	411.6	60
48	1	13.8667	62
45	1	265.767	63
45	1	265.767	63
44	1	69	67
46	1	77.1333	67
48	1	96.4	67
46	1	285	68
41	1	385.7	68
43	1	98	72
42	1	7.5	77
42	1	305.367	78
51	1	423.5	78
47	1	442.3	81
33	1	462.267	83
44	1	359.2	88
37	1	105.067	93
55	1.03333	430.7	19
38	1.03333	342.8	20
47	1.03333	240.233	21
47	1.03333	283.267	26
38	1.03333	162.067	34
49	1.03333	343.767	35
45	1.03333	26.2667	48
44	1.03333	195.367	48
47	1.03333	423.033	52
45	1.03333	325.967	54
44	1.03333	172.333	55
44	1.03333	319	57
45	1.03333	114.133	58
46	1.03333	178.4	60
46	1.03333	442.667	62
40	1.03333	15.8333	64
39	1.03333	1.73333	65
43	1.03333	409.967	67
47	1.03333	195.733	68
46	1.03333	379.733	68
41	1.03333	21.5667	69
47	1.03333	342.7	69
41	1.03333	67.7667	72
43	1.03333	236.667	72
40	1.03333	183.767	74
44	1.03333	267.3	74
36	1.03333	307.367	78
34	1.03333	208.1	80
46	1.06667	311.767	17
47	1.06667	271	24
47	1.06667	407.233	29
50	1.06667	386.867	30
37	1.06667	99.2	31
47	1.06667	324.133	31
45	1.06667	28.4667	32
47	1.06667	319	35
43	1.06667	432.567	44
44	1.06667	264.8	45
41	1.06667	217.5	50
47	1.06667	76.9	51
46	1.06667	441.3	51
36	1.06667	59.7667	53
41	1.06667	113.867	60
44	1.06667	29.5	62
44	1.06667	437.367	62
40	1.06667	245.6	65
45	1.06667	284.9	66
45	1.06667	457.867	66
32	1.06667	379.133	67
31	1.06667	379.133	67
40	1.06667	114.467	69
35	1.06667	180.433	69
43	1.06667	303.3	71
45	1.06667	272.167	72
40	1.06667	175.4	73
40	1.06667	175.4	73
44	1.06667	288.333	73
44	1.06667	116.067	74
44	1.06667	206.933	75
45	1.06667	324.767	75
47	1.06667	231.5	80
41	1.06667	261.2	80
42	1.06667	206.567	81
37	1.06667	260.733	81
48	1.1	277.467	15
52	1.1	101.367	17
41	1.1	432.8	20
44	1.1	330.333	24
35	1.1	331.167	25
39	1.1	21.3	26
44	1.1	3.23333	30
46	1.1	124.3	34
43	1.1	280.1	37
46	1.1	394.967	37
45	1.1	411.333	41
45	1.1	313.833	42
44	1.1	60.0667	44
37	1.1	240.467	47
43	1.1	328.8	49
44	1.1	76.4	55
45	1.1	121.367	55
45	1.1	129.333	55
42	1.1	68.7333	57
45	1.1	190.733	57
45	1.1	385.4	57
48	1.1	401.8	59
44	1.1	191.867	61
42	1.1	63.7667	67
43	1.1	146.767	68
38	1.1	86.2	72
41	1.1	98.3667	72
43	1.1	233.2	72
46	1.1	255.767	72
44	1.1	309.233	72
45	1.1	67.4	73
36	1.1	101.533	74
39	1.1	48.3333	75
47	1.1	341.767	75
43	1.1	265.267	76
44	1.1	232.333	77
40	1.1	391.033	77
39	1.1	414.967	79
42	1.1	277.567	80
45	1.1	296.067	80
43	1.1	58.9333	85
42	1.1	378.1	85
31	1.13333	88.1667	18
40	1.13333	218.5	21
47	1.13333	117.5	22
50	1.13333	449.167	27
47	1.13333	472.3	28
45	1.13333	187.933	30
43	1.13333	293.767	31
49	1.13333	320.933	36
45	1.13333	391.633	43
44	1.13333	21.0333	49
38	1.13333	411.9	50
43	1.13333	208.833	51
49	1.13333	353.2	51
45	1.13333	137.9	52
39	1.13333	20.8	56
44	1.13333	16.3	57
42	1.13333	395.8	58
45	1.13333	407.6	58
41	1.13333	471.3	59
39	1.13333	359.4	65
38	1.13333	131.233	66
43	1.13333	389	66
45	1.13333	396.133	66
45	1.13333	446.8	66
41	1.13333	187.7	69
45	1.13333	67.2	70
43	1.13333	56.4333	73
37	1.13333	257.633	73
43	1.13333	220.3	74
42	1.13333	1.9	77
38	1.13333	110.933	77
46	1.13333	195.2	77
45	1.13333	53.7667	80
41	1.13333	446.9	81
41	1.13333	263	83
45	1.13333	378.167	83
44	1.13333	263.033	85
37	1.13333	372.8	85
42	1.13333	378.767	85
43	1.13333	76.9333	94
47	1.16667	336	17
48	1.16667	432.8	18
46	1.16667	462.033	18
43	1.16667	51.9333	26
43	1.16667	470.4	29
46	1.16667	18.7	30
44	1.16667	410.2	36
51	1.16667	308.9	37
43	1.16667	444.333	38
37	1.16667	28.5333	39
47	1.16667	56.9333	39
45	1.16667	442.9	41
53	1.16667	319.133	43
61	1.16667	410.4	52
43	1.16667	219	55
44	1.16667	277.8	59
44	1.16667	64.8	60
42	1.16667	75.2667	60
43	1.16667	75.3333	61
48	1.16667	3.8	64
47	1.16667	69.6333	64
45	1.16667	129.967	68
40	1.16667	191.5	69
43	1.16667	128.833	70
42	1.16667	260.533	71
45	1.16667	357.367	71
43	1.16667	108.2	72
49	1.16667	391.8	72
45	1.16667	85.3667	73
37	1.16667	273.833	74
41	1.16667	347	76
45	1.16667	83.8	85
39	1.16667	390.7	86
41	1.16667	319.867	90
45	1.2	415.4	19
46	1.2	455.633	19
49	1.2	255.1	21
47	1.2	302.467	23
44	1.2	437.733	25
38	1.2	477.867	28
45	1.2	398.367	34
45	1.2	320.167	36
43	1.2	44.0333	37
41	1.2	139.933	40
45	1.2	359.667	42
45	1.2	231.933	43
51	1.2	217.967	44
40	1.2	128.7	49
46	1.2	246.667	49
42	1.2	267.533	50
49	1.2	401.467	50
51	1.2	265.133	58
40	1.2	218.9	59
41	1.2	103.667	66
43	1.2	395.367	67
40	1.2	75.4333	68
43	1.2	412.633	68
45	1.2	270.6	69
42	1.2	31.1667	70
47	1.2	297.4	70
45	1.2	43.6	71
41	1.2	53.9667	71
38	1.2	146.633	71
44	1.2	288.533	72
49	1.2	467.167	72
39	1.2	329.767	75
45	1.2	223.8	77
44	1.2	193.433	78
39	1.2	342.633	79
42	1.2	125.933	80
41	1.2	64.2	83
40	1.2	128.667	86
46	1.2	373.867	86
44	1.2	129.833	87
43	1.23333	42.7667	20
43	1.23333	456.233	21
39	1.23333	99.9	28
36	1.23333	410.9	28
45	1.23333	92.1333	29
45	1.23333	227.233	33
47	1.23333	136.133	34
45	1.23333	404.7	37
38	1.23333	36.4667	42
49	1.23333	321.467	43
41	1.23333	115.667	47
49	1.23333	64.4667	51
44	1.23333	2.76667	54
43	1.23333	2.46667	55
43	1.23333	36.0333	55
46	1.23333	123.433	55
44	1.23333	273.233	57
42	1.23333	397.8	58
48	1.23333	410.067	61
37	1.23333	66.5	65
46	1.23333	230.633	65
47	1.23333	441.433	65
43	1.23333	419.9	66
40	1.23333	91.9	68
46	1.23333	257.333	69
43	1.23333	0.966667	70
42	1.23333	456.967	71
45	1.23333	279.833	72
41	1.23333	174.567	74
44	1.23333	21.8333	75
40	1.23333	63.3333	75
43	1.23333	322.233	76
42	1.23333	417.767	79
44	1.23333	327.067	81
44	1.23333	439.567	83
41	1.23333	269.5	84
43	1.23333	154.333	86
40	1.23333	431.7	86
47	1.26667	382.2	17
48	1.26667	202.367	23
46	1.26667	249.233	28
42	1.26667	54.0667	33
44	1.26667	2.56667	39
39	1.26667	324.5	39
46	1.26667	463	39
43	1.26667	435.333	40
44	1.26667	455.733	41
51	1.26667	406.367	44
43	1.26667	444.233	45
48	1.26667	455.4	46
43	1.26667	57.4667	49
45	1.26667	313.6	49
46	1.26667	460.367	50
52	1.26667	396.967	51
46	1.26667	458.433	53
42	1.26667	376.633	55
46	1.26667	459.533	55
39	1.26667	52.1	59
46	1.26667	383.733	60
42	1.26667	44.0333	62
44	1.26667	121.4	62
40	1.26667	146.533	62
44	1.26667	218.833	62
44	1.26667	286.567	68
47	1.26667	348	70
42	1.26667	443.167	70
45	1.26667	138	71
38	1.26667	140.267	72
47	1.26667	273.9	72
47	1.26667	381.967	73
39	1.26667	89.9333	74
48	1.26667	220.233	74
41	1.26667	93.2667	75
44	1.26667	159.8	78
38	1.26667	212.633	86
41	1.26667	205	89
50	1.3	366.333	16
41	1.3	431.767	23
44	1.3	334.4	32
45	1.3	387.867	33
44	1.3	41.6	36
45	1.3	155.867	36
47	1.3	396.833	37
44	1.3	15.8333	38
45	1.3	229	40
46	1.3	407.4	40
45	1.3	380.3	42
42	1.3	325.333	44
40	1.3	78.9	46
43	1.3	53.3667	47
48	1.3	87.3333	47
49	1.3	95.4	50
47	1.3	444.933	51
48	1.3	130.333	54
44	1.3	211.9	54
43	1.3	271.333	54
38	1.3	22.9	55
44	1.3	44.3	55
46	1.3	59.8	56
44	1.3	293.967	56
49	1.3	194.467	57
47	1.3	235.833	57
43	1.3	231.833	59
48	1.3	143.833	62
45	1.3	146.267	62
42	1.3	98.7	63
46	1.3	293.5	63
40	1.3	242.133	64
42	1.3	1.96667	66
45	1.3	306.267	69
45	1.3	56.8333	72
42	1.3	178.4	73
46	1.3	253.267	75
43	1.3	229.267	76
39	1.3	3.2	77
40	1.3	2.13333	83
38	1.3	175.5	90
46	1.33333	19.3	18
47	1.33333	328.567	18
43	1.33333	368.9	29
44	1.33333	368.9	29
45	1.33333	54.1333	34
43	1.33333	433.267	36
48	1.33333	155.333	40
50	1.33333	216.1	41
45	1.33333	192.167	43
47	1.33333	111.533	45
43	1.33333	187.9	45
44	1.33333	99.6333	52
46	1.33333	51.5	56
41	1.33333	46.2333	57
43	1.33333	404.3	57
46	1.33333	6.83333	59
46	1.33333	158.933	59
43	1.33333	387.3	59
41	1.33333	430.167	59
45	1.33333	2.36667	62
46	1.33333	77.1	62
45	1.33333	68.5333	63
44	1.33333	266.167	63
45	1.33333	439.967	63
44	1.33333	126.7	67
42	1.33333	128.633	69
46	1.33333	209.833	70
45	1.33333	262.633	70
41	1.33333	1.3	73
42	1.33333	208.167	74
44	1.33333	302.367	74
45	1.33333	146.233	80
43	1.33333	268	80
40	1.33333	434.833	82
33	1.33333	166.3	83
36	1.33333	413.833	86
49	1.36667	472.567	16
49	1.36667	135.067	17
45	1.36667	421.033	19
42	1.36667	66.4333	21
46	1.36667	411.1	29
39	1.36667	419.967	29
45	1.36667	1.9	34
50	1.36667	271.567	34
44	1.36667	230.867	35
46	1.36667	351.733	35
38	1.36667	399.533	39
46	1.36667	45	40
43	1.36667	88.0333	41
41	1.36667	98.7	41
52	1.36667	329.933	41
47	1.36667	479.633	41
47	1.36667	164.533	44
39	1.36667	416.067	44
37	1.36667	2.5	47
48	1.36667	416.033	47
44	1.36667	379.767	49
46	1.36667	414.533	49
45	1.36667	134.167	53
44	1.36667	320.267	53
40	1.36667	101	55
38	1.36667	454.6	55
46	1.36667	452.133	59
47	1.36667	2.73333	61
44	1.36667	346.267	61
48	1.36667	449.2	61
46	1.36667	38.0667	64
45	1.36667	226.533	64
41	1.36667	276.033	65
42	1.36667	260.133	66
44	1.36667	315.933	67
43	1.36667	282.833	68
42	1.36667	88.5333	71
49	1.36667	284.267	71
49	1.36667	358.767	71
45	1.36667	218.3	72
47	1.36667	241.967	75
36	1.36667	60.6667	78
44	1.36667	249.367	78
44	1.36667	260.267	78
45	1.36667	117.4	79
31	1.36667	143.467	79
41	1.36667	138.433	81
41	1.36667	233.267	84
42	1.36667	369.367	84
37	1.36667	238.933	89
41	1.36667	111.233	94
35	1.36667	244.833	94
36	1.4	400.667	20
47	1.4	454.333	24
45	1.4	39.5	27
48	1.4	147.6	39
38	1.4	267.633	44
46	1.4	424.267	45
42	1.4	80	46
44	1.4	61.3	49
40	1.4	57.1333	50
46	1.4	87.5667	50
45	1.4	90.0667	50
42	1.4	12.5	54
47	1.4	231.367	55
44	1.4	375.6	55
43	1.4	24.1	59
44	1.4	269.067	60
42	1.4	78.4333	61
42	1.4	137.567	62
42	1.4	429.333	62
38	1.4	270	63
41	1.4	70.0333	64
39	1.4	53.8333	66
44	1.4	349.967	67
43	1.4	79.8667	68
44	1.4	107.367	68
40	1.4	139.233	68
42	1.4	165.733	68
44	1.4	311.767	68
34	1.4	250.267	69
44	1.4	152.4	70
43	1.4	111.733	73
39	1.4	170.833	73
41	1.4	266.9	73
40	1.4	232.7	75
36	1.4	348.733	75
42	1.4	225.967	77
43	1.4	113.167	80
43	1.4	275.8	82
39	1.4	446.067	83
43	1.4	351.5	91
43	1.43333	414.533	18
40	1.43333	85.0667	26
46	1.43333	439.967	28
45	1.43333	456.6	31
48	1.43333	186.133	34
45	1.43333	137.533	36
46	1.43333	137.533	36
42	1.43333	74.9667	41
43	1.43333	84.8	42
46	1.43333	251	42
41	1.43333	379.133	45
48	1.43333	240.5	46
40	1.43333	445.067	46
40	1.43333	90.5667	47
45	1.43333	271.567	48
40	1.43333	42.1667	51
41	1.43333	145.533	53
42	1.43333	3.63333	54
44	1.43333	63.4667	56
39	1.43333	1.9	57
44	1.43333	28.4	57
49	1.43333	397.4	58
45	1.43333	165.867	61
44	1.43333	324.967	62
43	1.43333	74.1	64
40	1.43333	419.267	64
43	1.43333	93.1667	66
44	1.43333	230.3	66
43	1.43333	131.9	72
44	1.43333	182.567	72
42	1.43333	77.8	75
44	1.43333	178.467	75
47	1.43333	401.267	76
41	1.43333	4.43333	77
43	1.43333	402.167	77
45	1.43333	227.333	78
42	1.43333	136.6	79
40	1.43333	87.5333	80
39	1.43333	161.567	81
39	1.43333	161.567	81
47	1.43333	189.867	81
40	1.43333	457.533	82
44	1.43333	96.6667	86
47	1.46667	303.967	16
49	1.46667	369.467	20
49	1.46667	403.3	21
46	1.46667	460.667	33
51	1.46667	409.5	34
48	1.46667	350.6	36
43	1.46667	134.067	37
42	1.46667	80.3	42
44	1.46667	324.233	42
45	1.46667	117.033	49
40	1.46667	15.2667	51
44	1.46667	392.367	51
41	1.46667	83.0667	54
42	1.46667	155.333	55
41	1.46667	300.267	57
42	1.46667	53.8667	58
43	1.46667	72.5	58
47	1.46667	129.533	58
43	1.46667	330.833	58
38	1.46667	406.5	58
39	1.46667	269.3	59
43	1.46667	94.0667	63
46	1.46667	317.267	63
39	1.46667	253.767	64
39	1.46667	253.767	64
39	1.46667	220	65
48	1.46667	437.767	65
30	1.46667	120.533	66
32	1.46667	120.533	66
41	1.46667	35.1667	67
40	1.46667	171.9	68
40	1.46667	1.83333	71
42	1.46667	117.1	71
42	1.46667	340.633	73
44	1.46667	340.633	73
43	1.46667	350.833	73
31	1.46667	213.1	74
40	1.46667	52.2667	75
46	1.46667	70.6333	75
45	1.46667	190.633	75
42	1.46667	213.4	77
39	1.46667	120.633	79
41	1.46667	128.367	79
46	1.46667	161.367	80
39	1.46667	391.833	82
43	1.46667	58.8667	83
37	1.46667	368.2	83
43	1.46667	377.367	83
42	1.46667	413.533	84
47	1.5	409.533	16
43	1.5	376.7	25
48	1.5	443.533	32
47	1.5	462.6	33
47	1.5	443.433	34
42	1.5	310.7	36
41	1.5	18.2667	42
43	1.5	238.633	43
44	1.5	253.467	44
39	1.5	204.633	46
42	1.5	401.467	46
42	1.5	407.833	47
46	1.5	333.667	48
38	1.5	377.367	50
43	1.5	446.8	51
39	1.5	440.867	53
49	1.5	141.267	54
42	1.5	311.967	54
42	1.5	97.6	58
45	1.5	89.0667	59
47	1.5	271.8	60
47	1.5	479.633	60
42	1.5	194.2	61
46	1.5	311.867	62
46	1.5	427.3	62
41	1.5	61.9	63
45	1.5	131.033	66
44	1.5	392.467	66
35	1.5	70.4	67
44	1.5	272.867	67
43	1.5	166.333	68
44	1.5	223.967	71
42	1.5	310.8	71
43	1.5	138.967	72
42	1.5	106.1	73
42	1.5	188.033	73
44	1.5	293.933	73
43	1.5	2.06667	74
39	1.5	51.9	78
43	1.5	52.5	78
47	1.5	147.833	79
44	1.5	102.8	80
46	1.5	445.533	89
42	1.5	88.6333	92
44	1.53333	46.3667	20
41	1.53333	59.3	24
45	1.53333	243.267	27
50	1.53333	28.2333	33
47	1.53333	466.133	33
35	1.53333	7.63333	38
45	1.53333	93.9333	39
37	1.53333	405	42
42	1.53333	285.6	43
44	1.53333	388	43
45	1.53333	69.7	46
40	1.53333	26.6667	47
47	1.53333	174.4	47
43	1.53333	448.467	47
40	1.53333	91.7333	48
44	1.53333	344.833	51
45	1.53333	392.8	51
48	1.53333	187.733	53
47	1.53333	28.7667	54
45	1.53333	250.633	54
46	1.53333	78.5333	57
44	1.53333	462.8	57
49	1.53333	421.6	58
42	1.53333	303.5	61
41	1.53333	329.733	62
44	1.53333	138.533	64
44	1.53333	144.533	64
48	1.53333	69.5333	65
27	1.53333	309.2	66
43	1.53333	26.2667	67
40	1.53333	401.933	67
47	1.53333	73.9667	68
45	1.53333	82.5333	68
47	1.53333	271.533	69
41	1.53333	73.9333	71
43	1.53333	125.567	71
43	1.53333	400.6	71
42	1.53333	166.433	73
43	1.53333	1.16667	74
41	1.53333	77.9333	74
37	1.53333	290.767	75
44	1.53333	115.533	76
39	1.53333	61.8333	78
44	1.53333	253.4	79
42	1.53333	144.467	81
41	1.53333	74.6	82
37	1.53333	87.0333	88
40	1.53333	469.333	90
39	1.53333	426.433	92
46	1.56667	49.8	15
52	1.56667	444.7	20
48	1.56667	348.4	21
50	1.56667	351.933	22
46	1.56667	385.1	23
42	1.56667	280.4	33
37	1.56667	402.067	39
46	1.56667	181.567	49
47	1.56667	146.567	51
43	1.56667	133.2	52
42	1.56667	261.533	52
44	1.56667	447.667	52
44	1.56667	91.8333	54
47	1.56667	378.1	54
41	1.56667	217.967	55
48	1.56667	19.6667	56
43	1.56667	52.3	60
41	1.56667	147.4	60
43	1.56667	80.3	62
42	1.56667	175.5	62
51	1.56667	334.5	62
41	1.56667	210.4	63
43	1.56667	43.9	64
42	1.56667	177.7	64
42	1.56667	34.5	66
41	1.56667	123.233	67
44	1.56667	126.6	67
45	1.56667	112.167	68
42	1.56667	142.633	68
40	1.56667	456	68
46	1.56667	82.3	69
43	1.56667	124.967	69
46	1.56667	411.233	69
44	1.56667	232.467	72
40	1.56667	88.2333	73
41	1.56667	195.3	74
45	1.56667	239.3	74
44	1.56667	243.6	76
29	1.56667	189.833	77
47	1.56667	356.067	77
37	1.56667	42.6	78
36	1.56667	295.6	79
45	1.56667	216.967	80
43	1.56667	476.167	81
42	1.6	434.767	16
37	1.6	44.2667	28
37	1.6	25.8333	29
46	1.6	452.133	29
48	1.6	101.567	31
40	1.6	448.7	36
46	1.6	268.933	45
45	1.6	66.3667	46
45	1.6	230.8	46
46	1.6	417.133	48
46	1.6	275.433	49
45	1.6	348.533	49
44	1.6	454.3	49
43	1.6	380.433	53
44	1.6	51.2333	54
40	1.6	62.3667	54
34	1.6	187.533	54
45	1.6	29.0333	59
46	1.6	405.167	59
41	1.6	381.1	60
46	1.6	339.167	61
44	1.6	276.6	62
48	1.6	308.967	62
47	1.6	152.5	63
47	1.6	4.36667	66
46	1.6	230.867	66
39	1.6	263.467	66
46	1.6	333.3	68
48	1.6	407.033	69
34	1.6	349.8	70
42	1.6	126.8	75
45	1.6	354.5	76
44	1.6	225.967	80
43	1.6	352.3	85
37	1.6	153.567	87
38	1.6	370.8	90
35	1.6	286.133	91
46	1.63333	52.9333	15
47	1.63333	401.133	20
44	1.63333	295.667	22
44	1.63333	371.033	24
48	1.63333	467.167	25
49	1.63333	415.733	35
49	1.63333	169.767	37
45	1.63333	143.767	39
48	1.63333	11.1333	40
48	1.63333	403.433	44
46	1.63333	431.967	45
45	1.63333	92.8667	46
41	1.63333	42.6667	47
41	1.63333	440.3	48
48	1.63333	254.5	49
44	1.63333	74.7	51
45	1.63333	53.5	52
45	1.63333	419.3	54
40	1.63333	425.8	55
39	1.63333	466.967	57
42	1.63333	62.1	58
46	1.63333	3.1	60
42	1.63333	76.3667	61
44	1.63333	315.567	61
44	1.63333	218.8	62
42	1.63333	96.4	63
42	1.63333	117.7	64
46	1.63333	410	66
45	1.63333	359.433	67
43	1.63333	252.033	68
43	1.63333	111.333	70
48	1.63333	272.633	72
44	1.63333	207.367	75
38	1.63333	242.767	80
43	1.63333	243.633	80
46	1.63333	422.4	81
42	1.63333	25.2667	86
43	1.63333	118.1	87
44	1.63333	237.3	88
46	1.63333	375.333	90
44	1.66667	60.4333	22
46	1.66667	82.6	22
35	1.66667	211.767	22
45	1.66667	316.567	23
46	1.66667	422	23
41	1.66667	476.6	24
40	1.66667	213.333	25
44	1.66667	240.9	25
46	1.66667	233.7	31
45	1.66667	241.6	33
38	1.66667	53.6667	37
44	1.66667	416.333	38
47	1.66667	76.1	39
49	1.66667	320.367	41
42	1.66667	421.833	42
49	1.66667	450.6	42
44	1.66667	283.1	45
49	1.66667	303.633	45
39	1.66667	6.26667	47
48	1.66667	418.967	47
46	1.66667	412.567	48
43	1.66667	2.83333	50
43	1.66667	94.9667	50
44	1.66667	52.3667	52
42	1.66667	193.033	53
43	1.66667	60.7	57
48	1.66667	347.1	57
43	1.66667	166.633	58
43	1.66667	199.133	59
45	1.66667	213.967	59
39	1.66667	247.067	60
41	1.66667	247.067	60
44	1.66667	387.567	60
46	1.66667	66.6333	62
36	1.66667	1.46667	63
43	1.66667	248.867	63
48	1.66667	418.3	63
35	1.66667	290.1	65
43	1.66667	62.7667	68
43	1.66667	269.333	68
42	1.66667	223.367	69
49	1.66667	94.5333	70
44	1.66667	150.8	70
48	1.66667	78.5667	71
49	1.66667	340.967	72
39	1.66667	342.067	73
40	1.66667	342.833	73
44	1.66667	419.767	73
46	1.66667	341.1	75
45	1.66667	351.967	75
41	1.66667	159.2	77
41	1.66667	118.833	80
39	1.66667	261.9	80
45	1.66667	290.767	88
40	1.66667	97.5333	89
44	1.7	459.667	18
44	1.7	462.2	20
50	1.7	130.667	23
46	1.7	349.7	25
45	1.7	366.433	27
40	1.7	56.1667	31
40	1.7	47	35
47	1.7	53.9667	38
45	1.7	257.3	38
45	1.7	97.6333	41
39	1.7	115.467	47
44	1.7	208.833	47
44	1.7	460.633	48
39	1.7	342.5	50
45	1.7	343.133	51
46	1.7	75.7667	54
47	1.7	357.267	55
44	1.7	100.367	58
43	1.7	222.933	58
48	1.7	237.967	58
45	1.7	284.167	60
49	1.7	318.967	62
44	1.7	134	64
42	1.7	2.6	65
38	1.7	44.3	65
46	1.7	82.6	65
43	1.7	35.6	67
45	1.7	256.567	67
42	1.7	421.767	68
46	1.7	442.5	68
39	1.7	472.567	68
48	1.7	101.533	70
41	1.7	156.8	73
47	1.7	412.533	73
44	1.7	341.967	74
46	1.7	254.033	77
45	1.7	254.033	77
39	1.7	125.433	78
46	1.7	193.533	78
44	1.7	159.5	81
45	1.7	159.5	81
45	1.7	289.633	81
45	1.7	368.933	81
42	1.7	155.467	82
37	1.7	273.067	82
46	1.7	239.5	87
42	1.7	474.6	88
40	1.7	260.267	89
45	1.73333	2.73333	23
52	1.73333	267.167	24
43	1.73333	3.43333	28
50	1.73333	240.8	30
46	1.73333	400.833	31
40	1.73333	146.867	32
42	1.73333	326.533	33
45	1.73333	280.033	34
45	1.73333	61.7667	35
43	1.73333	168.433	41
45	1.73333	253.8	41
40	1.73333	116.7	42
42	1.73333	265.1	44
43	1.73333	54.2667	45
43	1.73333	391.367	45
43	1.73333	388.967	47
44	1.73333	459.067	47
31	1.73333	59.0667	50
42	1.73333	2.43333	54
46	1.73333	201.667	56
40	1.73333	429.267	56
45	1.73333	269.667	57
39	1.73333	457.067	57
43	1.73333	265	58
41	1.73333	120.567	59
46	1.73333	2.4	60
49	1.73333	76.2333	60
40	1.73333	82.3	63
45	1.73333	65.6	66
42	1.73333	229.333	67
40	1.73333	144	68
49	1.73333	246.033	70
42	1.73333	200.4	71
45	1.73333	199.667	72
34	1.73333	414.933	73
45	1.73333	87.2	74
40	1.73333	136.3	74
36	1.73333	314.4	74
41	1.73333	189.833	75
44	1.73333	289.933	75
44	1.73333	230.067	76
46	1.73333	161.133	79
50	1.73333	184.1	82
42	1.73333	200.3	83
48	1.73333	236.967	83
41	1.73333	406.833	85
38	1.73333	290.4	86
45	1.76667	466.567	17
45	1.76667	52.7667	30
40	1.76667	453.867	30
45	1.76667	209.733	32
42	1.76667	208	37
45	1.76667	383.3	40
41	1.76667	53.6	43
46	1.76667	255	43
43	1.76667	98.3667	44
42	1.76667	55.7667	45
37	1.76667	47.0333	51
44	1.76667	249.7	51
43	1.76667	53.4333	52
44	1.76667	271.233	53
46	1.76667	0.366667	54
46	1.76667	188.567	54
45	1.76667	403.2	54
45	1.76667	48.8333	55
46	1.76667	386.133	55
42	1.76667	452.367	55
45	1.76667	181.7	56
46	1.76667	120.967	57
45	1.76667	169.133	58
47	1.76667	183.6	58
49	1.76667	290.7	58
48	1.76667	290.7	58
45	1.76667	417.733	62
47	1.76667	59.5667	63
44	1.76667	426.7	63
40	1.76667	442.633	64
45	1.76667	53.1667	67
45	1.76667	353.433	67
43	1.76667	2.46667	69
44	1.76667	154.433	72
42	1.76667	76.8667	73
41	1.76667	105.667	77
48	1.76667	287.767	77
44	1.76667	376.133	77
42	1.76667	430.267	78
46	1.76667	380.667	79
41	1.76667	424.8	82
36	1.76667	473.667	82
40	1.76667	281.133	83
42	1.76667	198.033	85
44	1.76667	304.2	89
49	1.8	171.9	23
50	1.8	416.067	23
44	1.8	93.9	25
47	1.8	146.5	25
44	1.8	440.933	26
43	1.8	128.6	28
44	1.8	454.267	28
45	1.8	305.067	34
44	1.8	390.933	35
45	1.8	475.467	35
42	1.8	80.2667	36
42	1.8	85.2667	38
43	1.8	449.233	38
42	1.8	50.5	42
44	1.8	112.333	45
44	1.8	63.2	46
45	1.8	371.533	46
43	1.8	140.067	47
42	1.8	348.367	48
44	1.8	447.733	48
42	1.8	242.067	50
46	1.8	154.1	51
42	1.8	77.7667	53
43	1.8	95.2333	53
45	1.8	163.9	54
46	1.8	345.6	54
44	1.8	44.1333	55
35	1.8	423.533	55
40	1.8	2.83333	57
42	1.8	409.033	57
45	1.8	409.033	57
46	1.8	409.567	57
43	1.8	453.467	57
42	1.8	256.6	58
42	1.8	28.5333	59
47	1.8	421.867	59
45	1.8	444.767	59
45	1.8	201.333	60
48	1.8	341.967	60
49	1.8	282.4	62
42	1.8	420.433	64
46	1.8	459.467	66
45	1.8	67.3333	68
48	1.8	284.833	68
44	1.8	123.967	70
42	1.8	179.7	70
44	1.8	402.167	70
44	1.8	45.5	71
41	1.8	265.767	71
45	1.8	288.433	77
45	1.8	312.733	77
44	1.8	267.933	80
42	1.8	100.133	81
41	1.8	297.933	82
37	1.8	415.8	84
39	1.8	25.6	85
41	1.8	260.533	85
49	1.8	261.233	86
43	1.8	327.9	91
40	1.8	146.333	92
47	1.83333	47.7333	20
49	1.83333	70.6667	23
45	1.83333	155.633	25
43	1.83333	462.933	27
47	1.83333	389.267	28
46	1.83333	360.633	29
40	1.83333	428.467	33
45	1.83333	436.5	42
44	1.83333	250.933	43
44	1.83333	447.1	44
46	1.83333	78.7667	45
37	1.83333	394.8	45
47	1.83333	243.8	46
44	1.83333	225.267	47
47	1.83333	443.633	47
47	1.83333	242.467	49
48	1.83333	52.1333	54
44	1.83333	264.4	57
42	1.83333	292.067	57
38	1.83333	29.6	60
43	1.83333	188.767	62
42	1.83333	45.5333	67
46	1.83333	230.1	68
46	1.83333	279.4	69
38	1.83333	249.033	71
38	1.83333	76.3333	72
47	1.83333	295.933	72
47	1.83333	433.3	72
48	1.83333	219.667	73
48	1.83333	222.367	73
45	1.83333	49.7	74
40	1.83333	211.767	74
40	1.83333	259.067	74
43	1.83333	449.133	74
40	1.83333	311	75
44	1.83333	310.767	77
44	1.83333	101.567	79
44	1.83333	314.633	79
42	1.83333	325.733	81
39	1.83333	423.667	82
43	1.83333	258.1	84
49	1.86667	437.6	17
50	1.86667	369.7	19
45	1.86667	4.1	23
40	1.86667	431.133	24
47	1.86667	17	25
47	1.86667	320.767	26
47	1.86667	126.933	30
43	1.86667	457.5	30
43	1.86667	3.3	34
44	1.86667	416	36
45	1.86667	333.667	37
38	1.86667	379.633	39
49	1.86667	402.533	39
48	1.86667	283.6	41
49	1.86667	285.667	41
38	1.86667	99.1333	43
47	1.86667	379.933	44
40	1.86667	256.6	45
42	1.86667	411.133	49
43	1.86667	104.3	50
46	1.86667	474.7	52
48	1.86667	203.967	54
48	1.86667	129.5	57
41	1.86667	265.267	59
41	1.86667	351.833	60
44	1.86667	67.5333	61
46	1.86667	168.9	62
44	1.86667	155.533	63
40	1.86667	212	63
39	1.86667	104.9	64
44	1.86667	255.067	66
40	1.86667	14.7333	68
45	1.86667	250.133	70
41	1.86667	73.7333	72
38	1.86667	141.5	73
44	1.86667	122.133	76
46	1.86667	160.367	77
41	1.86667	222.833	77
47	1.86667	163.5	78
47	1.86667	128.533	79
41	1.86667	116.133	80
45	1.86667	467.9	80
42	1.86667	188.633	81
42	1.86667	325.1	81
42	1.86667	331.933	82
45	1.86667	219.833	83
40	1.86667	381.833	83
44	1.86667	158.9	85
42	1.86667	273.133	85
46	1.86667	334.867	85
41	1.86667	237.567	87
42	1.86667	389.5	88
44	1.86667	429.667	88
41	1.86667	251.5	90
47	1.9	455.2	17
47	1.9	461.7	19
47	1.9	292.4	21
42	1.9	203.8	23
43	1.9	188.567	24
48	1.9	50.7	27
43	1.9	161	31
41	1.9	264.067	34
47	1.9	406.8	36
45	1.9	92	38
47	1.9	262.333	38
42	1.9	31.5	43
43	1.9	459.533	45
42	1.9	54.1333	46
43	1.9	120.5	46
48	1.9	436.8	46
43	1.9	2.96667	47
46	1.9	12.2333	47
42	1.9	41.6667	48
45	1.9	160.1	49
43	1.9	321.333	49
46	1.9	79.9	51
48	1.9	334.9	53
42	1.9	460.233	55
41	1.9	349.833	56
46	1.9	358.7	56
43	1.9	62.4333	57
47	1.9	131.167	57
42	1.9	136.167	59
49	1.9	375.2	59
42	1.9	194.733	60
42	1.9	85.6667	62
45	1.9	271.4	63
42	1.9	83.8	64
45	1.9	137.467	64
46	1.9	191.6	64
48	1.9	71.4	67
39	1.9	237	68
42	1.9	75.1	69
46	1.9	96.2333	69
40	1.9	89.9333	72
44	1.9	72.8	73
46	1.9	294.033	73
44	1.9	294.5	73
45	1.9	58.6667	74
46	1.9	136.4	74
43	1.9	164.2	74
45	1.9	439.667	74
43	1.9	225.733	77
43	1.9	342.9	77
47	1.9	348.9	78
47	1.9	92.8667	82
45	1.9	232.8	85
43	1.9	39.2667	86
41	1.9	381.133	87
40	1.9	271.633	89
46	1.93333	438	17
44	1.93333	24.7	25
41	1.93333	73.8333	26
45	1.93333	227.067	26
45	1.93333	232.4	36
45	1.93333	412.633	37
40	1.93333	57.4667	43
45	1.93333	61.7667	43
46	1.93333	112.367	44
46	1.93333	246	44
36	1.93333	2.2	45
43	1.93333	479.533	46
46	1.93333	406.733	47
43	1.93333	113.433	48
39	1.93333	353.933	49
48	1.93333	86.3333	50
46	1.93333	446.967	52
42	1.93333	250.1	54
42	1.93333	354.233	54
47	1.93333	463.267	54
42	1.93333	170.933	55
43	1.93333	128.733	56
43	1.93333	426.333	56
42	1.93333	13.7	57
45	1.93333	301.333	57
45	1.93333	369.533	57
43	1.93333	440.9	57
47	1.93333	40.6333	59
45	1.93333	92.5	63
42	1.93333	181.733	63
44	1.93333	236.433	63
40	1.93333	291.7	63
37	1.93333	102.8	67
45	1.93333	261.033	67
49	1.93333	291.3	67
42	1.93333	409.267	67
45	1.93333	113.333	68
47	1.93333	202.1	68
43	1.93333	14.0667	69
39	1.93333	190.2	69
43	1.93333	25.8	70
44	1.93333	144	70
43	1.93333	2	71
41	1.93333	168.6	72
43	1.93333	282.867	73
44	1.93333	287.567	73
40	1.93333	77.5667	74
42	1.93333	332.833	74
46	1.93333	309.2	76
41	1.93333	154.533	80
41	1.93333	40.1667	85
44	1.93333	298.7	92
43	1.96667	53.6	15
48	1.96667	54.3333	25
45	1.96667	2.76667	30
43	1.96667	51.3	32
43	1.96667	51.3	32
41	1.96667	91.1667	36
47	1.96667	119	36
44	1.96667	264.833	38
45	1.96667	335.867	38
46	1.96667	448.233	38
44	1.96667	377.433	41
43	1.96667	377.433	41
45	1.96667	421	42
47	1.96667	56.2667	43
51	1.96667	108.7	43
38	1.96667	244.867	45
41	1.96667	445.833	45
43	1.96667	55.1333	48
41	1.96667	58.5	48
44	1.96667	91.7	51
45	1.96667	279.233	52
45	1.96667	309.633	53
43	1.96667	324.367	55
43	1.96667	408.4	56
39	1.96667	1.66667	57
42	1.96667	93.9667	57
43	1.96667	93.9667	57
46	1.96667	215.2	57
47	1.96667	450.6	57
46	1.96667	14.4667	59
47	1.96667	246.933	61
44	1.96667	288.467	61
40	1.96667	121.333	64
43	1.96667	123.167	64
43	1.96667	330.133	64
42	1.96667	147.567	65
45	1.96667	130.2	66
44	1.96667	84.4333	67
38	1.96667	233.267	67
42	1.96667	249.133	68
42	1.96667	268.867	68
42	1.96667	243.767	70
48	1.96667	274.667	70
46	1.96667	282.1	72
45	1.96667	35.3	73
40	1.96667	71	74
40	1.96667	105.567	75
43	1.96667	160.967	75
40	1.96667	289.833	75
46	1.96667	411.067	76
38	1.96667	229.467	79
44	1.96667	476	81
40	1.96667	272.667	83
44	1.96667	103.9	89
42	1.96667	274.867	95
50	2	420.6	18
43	2	255.667	28
39	2	414.6	30
40	2	316.4	31
49	2	136.3	37
46	2	70.1	38
46	2	404.467	43
43	2	53.7667	44
44	2	350.767	44
42	2	115.667	46
44	2	128.367	46
44	2	296.633	46
40	2	2.2	47
44	2	41.1333	47
46	2	16.0333	48
42	2	81.9333	49
41	2	95	51
45	2	115.967	51
43	2	19.5333	54
43	2	272.533	54
38	2	409.8	54
41	2	135.5	55
35	2	85.7667	56
34	2	85.7667	56
38	2	200.833	56
44	2	370.067	57
46	2	420.967	57
45	2	463.8	57
44	2	247.333	61
45	2	396.133	61
39	2	304.333	64
41	2	40.5	65
45	2	312.367	67
46	2	161.733	71
43	2	176.833	71
44	2	291.5	71
44	2	104	72
43	2	146.633	72
45	2	165.567	72
40	2	103.033	73
38	2	224.467	73
42	2	136.433	74
41	2	38.2333	75
46	2	132.567	78
45	2	211.4	79
46	2	328.833	84
42	2	396.8	84
33	2	365.333	85
40	2	443.667	87
44	2.03333	249.1	22
39	2.03333	58.2333	26
42	2.03333	307.7	30
52	2.03333	338.4	30
42	2.03333	169.867	31
39	2.03333	94.5667	33
47	2.03333	299.8	34
45	2.03333	415.667	34
50	2.03333	293.333	35
39	2.03333	394.967	38
45	2.03333	336.033	40
43	2.03333	385.8	41
44	2.03333	207.5	44
47	2.03333	125.833	48
46	2.03333	336.7	48
45	2.03333	242.833	51
44	2.03333	111.467	52
44	2.03333	133.9	53
46	2.03333	468.367	53
44	2.03333	21.4333	57
41	2.03333	447.8	58
41	2.03333	83.8	59
45	2.03333	293.833	59
43	2.03333	70.4667	62
43	2.03333	130.767	63
42	2.03333	143.767	64
45	2.03333	101.2	66
44	2.03333	202.2	66
44	2.03333	309.5	66
44	2.03333	224.533	67
45	2.03333	231.2	67
45	2.03333	238.667	68
45	2.03333	311.667	69
43	2.03333	45.8	71
44	2.03333	175.533	71
44	2.03333	97.2667	72
44	2.03333	306.967	73
42	2.03333	15.1	74
42	2.03333	93.7667	75
47	2.03333	244.567	76
43	2.03333	337.067	77
46	2.03333	290.367	78
43	2.03333	271.1	81
47	2.03333	394.667	81
37	2.03333	119.4	84
42	2.03333	292.133	85
46	2.06667	95.9	15
44	2.06667	458.767	15
47	2.06667	386.6	23
42	2.06667	367.4	24
45	2.06667	82.6667	32
50	2.06667	224.133	32
45	2.06667	3.9	33
45	2.06667	77.7667	36
35	2.06667	0.866667	38
46	2.06667	107.1	41
46	2.06667	330.1	41
42	2.06667	67.8	43
40	2.06667	98.3	44
45	2.06667	299.2	44
46	2.06667	48.4667	45
47	2.06667	52	45
40	2.06667	199.067	45
46	2.06667	199.9	47
42	2.06667	418.133	47
45	2.06667	441.967	48
44	2.06667	220.1	50
45	2.06667	316.5	51
42	2.06667	438.733	51
42	2.06667	80.9	52
44	2.06667	188.7	53
44	2.06667	343.5	54
43	2.06667	420.333	55
38	2.06667	94.1333	56
42	2.06667	230.933	56
41	2.06667	331.7	57
37	2.06667	47.1667	59
43	2.06667	247.467	60
43	2.06667	247.467	60
47	2.06667	255.867	60
46	2.06667	10.1333	61
40	2.06667	25.9	61
44	2.06667	332.333	63
41	2.06667	432.833	63
46	2.06667	401	64
39	2.06667	2.6	65
44	2.06667	258.9	66
31	2.06667	261.967	66
48	2.06667	343.967	66
38	2.06667	77.7333	67
45	2.06667	134.9	67
40	2.06667	170.467	67
43	2.06667	210.533	67
43	2.06667	74.1333	69
43	2.06667	252.3	69
40	2.06667	175.533	71
45	2.06667	338.933	71
41	2.06667	48.5	72
48	2.06667	74.6333	72
44	2.06667	275.567	72
42	2.06667	133	73
43	2.06667	283.567	74
42	2.06667	43.8333	75
39	2.06667	89.0333	75
46	2.06667	112.067	75
46	2.06667	276.133	77
39	2.06667	50.0667	80
46	2.06667	262.933	80
44	2.06667	59.1333	82
44	2.06667	91.0333	83
37	2.06667	294.3	83
41	2.06667	74.5667	84
41	2.06667	167.333	85
41	2.06667	216.533	86
41	2.06667	102.067	87
50	2.1	91.8	19
45	2.1	328.1	19
47	2.1	300.1	21
46	2.1	341.9	21
43	2.1	385.4	25
42	2.1	145.833	32
34	2.1	226.8	34
46	2.1	411	36
42	2.1	83.6667	41
43	2.1	163.067	41
40	2.1	461.733	41
38	2.1	344.8	46
46	2.1	275.067	49
51	2.1	350.7	50
48	2.1	443.933	51
42	2.1	137.267	52
43	2.1	209.367	53
41	2.1	192.5	56
46	2.1	71.8333	59
42	2.1	460.733	59
45	2.1	286.067	61
47	2.1	191.333	63
44	2.1	347.867	64
41	2.1	97.8333	65
47	2.1	307.7	65
45	2.1	121.633	66
47	2.1	179.7	66
46	2.1	168.467	67
43	2.1	172.133	67
44	2.1	51.9	68
46	2.1	133.7	68
40	2.1	199.167	68
44	2.1	348.4	68
40	2.1	426.2	68
45	2.1	455.433	68
37	2.1	193.5	70
47	2.1	303.367	70
43	2.1	58	71
44	2.1	274.267	71
43	2.1	124.067	73
46	2.1	133.433	73
44	2.1	160.867	73
46	2.1	446.233	74
46	2.1	127.933	75
41	2.1	77.6	76
35	2.1	313.767	76
42	2.1	3.36667	77
47	2.1	180.867	78
46	2.1	115.2	79
40	2.1	171.6	79
42	2.1	406.8	79
38	2.1	288.4	82
45	2.1	281.933	86
41	2.1	242.133	91
46	2.13333	117.933	18
46	2.13333	268.7	18
51	2.13333	168.267	22
34	2.13333	281.567	29
42	2.13333	419.7	36
47	2.13333	54.5333	39
42	2.13333	249.733	41
46	2.13333	346.933	42
50	2.13333	451.433	42
46	2.13333	432.3	43
45	2.13333	473.1	43
44	2.13333	473.1	43
43	2.13333	85.3	44
41	2.13333	320.433	44
46	2.13333	412.833	45
40	2.13333	64.9333	49
43	2.13333	241.267	49
47	2.13333	87.2667	50
42	2.13333	375.233	55
46	2.13333	203.667	56
43	2.13333	276.633	56
47	2.13333	27.4	57
40	2.13333	81.1333	57
43	2.13333	153.5	58
38	2.13333	4	61
45	2.13333	17.9	61
45	2.13333	242.867	61
37	2.13333	388.467	61
47	2.13333	256.033	62
35	2.13333	132.8	63
46	2.13333	241.9	63
41	2.13333	36.8	64
45	2.13333	192.6	68
48	2.13333	253.833	69
47	2.13333	197.9	70
34	2.13333	351.533	70
44	2.13333	33.2	72
39	2.13333	163.8	72
36	2.13333	449.433	73
46	2.13333	60.3667	74
44	2.13333	104.033	75
48	2.13333	255.6	75
41	2.13333	194.4	76
37	2.13333	323.033	78
43	2.13333	63	80
42	2.13333	98.0667	80
[truncated: 40,401 more rows]

## Sheet: TSH
Thyrotropin
Result (mIU/L)	Rest time (min)	Minutes after 7am	Age
2.4	0.1	433	20
1.6	0.1	293.8	49
1.9	0.166667	164.4	47
1.3	0.166667	141.1	63
0.68	0.2	404.2	55
0.81	0.2	160.633	62
1.5	0.233333	234.3	79
0.15	0.333333	303.667	56
1.2	0.333333	249.4	34
6.5	0.366667	250.933	48
1.6	0.366667	158.567	40
2.2	0.366667	51.7667	49
0.85	0.366667	44.7	40
3.7	0.433333	345.433	58
0.29	0.433333	213.167	61
2.1	0.466667	122.2	66
2.6	0.466667	100.967	50
4	0.466667	61.9333	27
0.7	0.5	402.733	65
4.2	0.5	379.7	21
0.03	0.533333	378.1	35
3.1	0.533333	169.1	89
2.8	0.566667	474.933	57
0.99	0.566667	395.4	80
2.9	0.566667	332.567	59
1.1	0.566667	149.467	48
3.5	0.566667	143.1	59
1.3	0.566667	17.5333	62
1.5	0.6	400.067	30
0.99	0.6	352.733	39
1.5	0.6	224.333	47
1.6	0.6	77.0333	52
0.35	0.633333	408.167	66
1.5	0.633333	404.9	61
8.9	0.633333	217.367	47
2.9	0.633333	120.867	58
2.1	0.666667	425.6	59
0.91	0.666667	172.167	63
2.6	0.666667	104.467	58
1.4	0.666667	104.367	34
1.3	0.666667	80.3667	38
0.85	0.7	455.267	25
1.7	0.7	348.267	40
1.8	0.7	343.6	20
4.5	0.7	338.767	34
3.6	0.7	221.233	66
1.8	0.7	125.3	58
6.7	0.7	121.567	38
13.2	0.7	93.2667	36
2.1	0.7	89.1	74
1	0.7	84.8667	32
1.7	0.7	79.9333	66
2	0.7	72.4	68
3.4	0.7	67.2667	35
0.42	0.733333	418.833	22
0.92	0.733333	386.9	59
0.74	0.733333	350.333	46
1.3	0.733333	245.933	20
1.2	0.766667	462.767	42
5	0.766667	404.367	55
0.58	0.766667	337.133	42
8.9	0.766667	316.767	47
1.8	0.766667	250.8	21
0.74	0.766667	157.667	48
<0,03	0.766667	129.033	43
1.2	0.766667	60.5333	71
4.2	0.766667	54.3667	50
1.1	0.8	368.267	58
0.62	0.8	362.5	29
8.1	0.8	272.367	45
2.6	0.8	223.733	75
0.21	0.8	222.967	64
2	0.8	138.367	47
2.1	0.8	135.4	31
2.2	0.8	129.567	28
2.4	0.8	77.8333	23
2.6	0.8	61.3667	45
14.1	0.8	59.2	83
1.3	0.8	50.8667	28
4.1	0.8	40.3	23
1.4	0.8	0.3	61
2	0.833333	454.733	55
1.2	0.833333	416.733	85
1.2	0.833333	405.867	47
5.3	0.833333	221.9	59
1.3	0.833333	92.4667	50
3.5	0.833333	80.8667	29
4.3	0.833333	52.8667	70
2.7	0.833333	2.2	69
1.6	0.833333	1	82
6.3	0.866667	475.367	33
3.1	0.866667	286.133	30
4.3	0.866667	231.733	49
2	0.866667	226.667	28
1.3	0.866667	92.2333	32
<0,03	0.866667	68.6	63
2.1	0.866667	31.8	85
0.22	0.9	475.933	72
2.9	0.9	414.067	84
1.5	0.9	318.467	72
<0,03	0.9	260.867	46
2	0.9	251.033	80
1.4	0.9	242.533	33
1.1	0.9	240.033	40
2.9	0.9	235.133	28
0.65	0.9	165.067	39
3.5	0.9	110.967	48
0.18	0.9	97.1667	78
<0,03	0.9	70.9667	70
2	0.9	57.7	46
1.3	0.9	56.7333	64
6.9	0.9	56.2667	31
2.2	0.9	43.3667	57
0.49	0.933333	454.967	31
1.7	0.933333	349.4	26
3.1	0.933333	255.1	42
3.7	0.933333	251.7	36
2.4	0.933333	250.433	92
1.2	0.933333	247.5	72
1.3	0.933333	156.5	33
2.5	0.933333	143.833	21
4.1	0.933333	122.7	60
4.3	0.933333	115.367	84
2.5	0.933333	97.2667	63
<0,03	0.933333	92.9667	73
0.03	0.933333	85.8667	66
3	0.933333	80.4333	31
3.7	0.933333	69.6	27
1.1	0.966667	436.533	51
2.1	0.966667	418.367	54
2.8	0.966667	402.7	41
0.78	0.966667	378.4	66
0.71	0.966667	369.267	59
<0,03	0.966667	352.633	35
1.8	0.966667	343.5	64
1.7	0.966667	324.333	20
1.5	0.966667	316.833	82
3.4	0.966667	307.767	79
1.9	0.966667	291.167	82
3.3	0.966667	276.1	44
3.6	0.966667	275.333	73
1.7	0.966667	272.233	42
3.9	0.966667	265.567	22
0.47	0.966667	255.167	69
0.45	0.966667	255.167	69
2	0.966667	187.5	72
1.1	0.966667	115.633	48
6.9	0.966667	84.7	73
<0,03	0.966667	63.1333	27
1.1	0.966667	62.3667	42
3.4	0.966667	61.7333	41
0.34	1	385.167	80
1.2	1	320.133	33
1.7	1	305.6	21
0.97	1	265.767	63
2.9	1	259.167	45
3.6	1	230.3	100
1.8	1	214.233	51
2.3	1	68.9	43
2.9	1	52.3667	32
2.1	1	13.8333	37
2.3	1	7.5	77
0.66	1.03333	272.033	47
1.2	1.03333	240.233	21
2	1.03333	183.767	74
3.7	1.03333	178.4	60
1.2	1.03333	99.4	46
3.1	1.03333	76.6	40
2.2	1.03333	44.9667	69
1.4	1.03333	26.2667	48
4.5	1.03333	15.8333	64
2.3	1.06667	457.867	66
2.4	1.06667	414.967	22
2.7	1.06667	407.233	29
1.7	1.06667	386.867	30
1.3	1.06667	379.467	64
0.89	1.06667	379.133	67
0.89	1.06667	379.133	67
2.2	1.06667	319	35
3.5	1.06667	271	24
1.4	1.06667	264.8	45
2	1.06667	258.967	22
1.5	1.06667	245.6	65
1.7	1.06667	217.5	50
2.8	1.06667	149.333	52
1.6	1.06667	99.2	31
4.6	1.06667	86.5333	21
1.8	1.06667	56.7667	69
2.8	1.06667	28.4667	32
3	1.06667	16	68
2.4	1.1	447.3	35
3.4	1.1	432.8	20
0.75	1.1	391.033	77
2.6	1.1	385.633	36
2.4	1.1	330.333	24
1.1	1.1	258.767	81
2.2	1.1	251.7	91
4.4	1.1	244.667	72
2	1.1	240.467	47
1.9	1.1	223.233	28
1.6	1.1	190.733	57
0.18	1.1	101.533	74
1.1	1.1	67.4	73
1.6	1.1	60.0667	44
0.68	1.1	30.7333	56
3.2	1.1	25.6	37
2.8	1.1	20.1333	70
1.1	1.13333	472.3	28
0.05	1.13333	472.1	60
2.3	1.13333	466.767	27
6.8	1.13333	454.8	59
0.97	1.13333	449.167	27
2.2	1.13333	424.067	36
1.5	1.13333	411.9	50
0.06	1.13333	381.833	35
1.8	1.13333	351.767	48
1.8	1.13333	321	33
2.1	1.13333	320.933	36
4.2	1.13333	273.233	57
2.8	1.13333	269.167	50
0.78	1.13333	187.933	30
0.13	1.13333	184.467	61
2.2	1.13333	167.733	57
1.6	1.13333	141.9	87
1.3	1.13333	137.9	52
1.7	1.13333	110.933	77
4.8	1.13333	76.9333	94
1.2	1.13333	67.2	70
1.9	1.13333	27.4	33
2.6	1.13333	21.0333	49
1.1	1.13333	14.5	50
0.95	1.13333	3.7	47
4	1.16667	415.5	20
0.46	1.16667	410.4	52
4	1.16667	317.133	40
2	1.16667	277.8	59
1.6	1.16667	273.833	74
<0,03	1.16667	232	37
1.5	1.16667	75.3333	61
4.2	1.16667	64.8	60
2	1.16667	47.8333	51
2.2	1.16667	40.6	73
1.3	1.16667	31.0667	51
2.7	1.16667	3.8	64
1.9	1.16667	2.5	41
0.99	1.2	467.167	72
2	1.2	466.467	31
0.79	1.2	437.733	25
2	1.2	417	21
2	1.2	410.4	25
1.5	1.2	401.467	50
2.6	1.2	395.367	67
4.4	1.2	359.667	42
1.1	1.2	348.1	64
1.1	1.2	320.167	36
1.3	1.2	302.467	23
1.9	1.2	288.533	72
1.5	1.2	265.133	58
0.84	1.2	255.1	21
0.06	1.2	248.3	61
1.2	1.2	231.933	43
0.42	1.2	226.667	34
0.93	1.2	137.7	40
1.2	1.2	128.667	86
1.6	1.2	50.5	58
1.7	1.2	44.0333	37
3.6	1.2	38.2667	25
2	1.2	31.1667	70
2	1.2	5.53333	53
2.3	1.23333	397.8	58
1.4	1.23333	322.933	32
1.5	1.23333	321.467	43
1.2	1.23333	257.333	69
1.7	1.23333	215.2	73
1.6	1.23333	115.667	47
5.5	1.23333	63.3333	75
2.2	1.23333	58.5667	72
5	1.23333	42.2	54
6.8	1.23333	33.4333	54
1.7	1.26667	463	39
4	1.26667	455.733	41
0.66	1.26667	452.5	69
2.4	1.26667	413.6	50
2	1.26667	376.633	55
0.09	1.26667	374.233	54
1.2	1.26667	313.6	49
1.1	1.26667	295.333	21
1.4	1.26667	225.933	52
1.4	1.26667	202.367	23
8.8	1.26667	82.0333	81
0.09	1.26667	81.1667	38
1.8	1.26667	57.4667	49
1.8	1.26667	54.0667	33
0.27	1.26667	52.1	59
1	1.26667	2.56667	39
0.28	1.3	414.233	63
1.4	1.3	407.4	40
1.2	1.3	396.833	37
2.3	1.3	393.467	20
5	1.3	380.3	42
5.1	1.3	279.733	64
1.2	1.3	271.333	54
1.6	1.3	263.167	65
1.1	1.3	254.667	79
0.56	1.3	235.833	57
1.6	1.3	229	40
0.14	1.3	142.467	53
0.66	1.3	130.333	54
4.3	1.3	99.9333	35
3.9	1.3	78.9	46
0.91	1.3	69	70
1.5	1.3	59.8	56
0.12	1.3	43.8667	61
4.4	1.3	22.9	55
1.8	1.3	18.2333	72
3.1	1.3	2.13333	83
2.5	1.33333	439.967	63
0.3	1.33333	396.967	58
1.6	1.33333	370.933	30
1.2	1.33333	368.9	29
<0,03	1.33333	338.7	79
1.2	1.33333	288.867	51
3.6	1.33333	247.433	72
2.9	1.33333	158.933	59
1.3	1.33333	155.333	40
0.1	1.33333	154.933	53
3.8	1.33333	146.233	80
1.3	1.33333	128.633	69
50.9	1.33333	59.2667	73
1.2	1.33333	46.8	69
1.4	1.33333	2.36667	62
1.6	1.33333	2.1	58
2	1.36667	454.6	55
0.73	1.36667	450.033	60
0.93	1.36667	416.033	47
3.7	1.36667	411.1	29
0.19	1.36667	399.533	39
0.92	1.36667	379.067	39
1.3	1.36667	351.733	35
1.3	1.36667	282.833	68
2.2	1.36667	271.567	34
1.8	1.36667	260.267	78
0.55	1.36667	244.833	94
1.7	1.36667	230.867	35
2.3	1.36667	164.533	44
1.2	1.36667	85.6667	69
1.6	1.36667	66.4333	21
1	1.36667	45	40
2.1	1.36667	18.9667	40
0.79	1.36667	2.73333	61
2.8	1.36667	2.2	66
1.1	1.4	467.1	30
1.9	1.4	429.333	62
4	1.4	375.6	55
4	1.4	375.6	55
2.2	1.4	311.767	68
5.2	1.4	267.633	44
1.8	1.4	218.567	60
<0,03	1.4	102.733	71
2.6	1.4	90.0667	50
3.3	1.4	75.6667	30
0.33	1.4	70.0333	64
1.6	1.4	69	40
1.4	1.4	37.5333	33
2.4	1.4	24.1	59
3.2	1.4	12.5	54
3.7	1.4	8.03333	48
0.62	1.43333	457.533	82
1.3	1.43333	397.4	58
3.6	1.43333	379.133	45
1.9	1.43333	359.167	61
0.36	1.43333	324.967	62
2.3	1.43333	271.567	48
3.4	1.43333	230.3	66
2.1	1.43333	220.733	56
1.1	1.43333	216.267	39
1.5	1.43333	161.567	81
<0,03	1.43333	145.533	53
2	1.43333	141.633	52
2.2	1.43333	137.533	36
2.5	1.43333	121.333	70
4.9	1.43333	114.833	22
0.54	1.43333	85.0667	26
0.24	1.43333	43.3333	38
5.4	1.43333	31.8333	54
6	1.43333	27.1667	66
4.7	1.43333	3.63333	54
1.2	1.46667	460.667	33
1.2	1.46667	413.533	84
2.9	1.46667	369.467	20
1.5	1.46667	340.633	73
1.5	1.46667	340.633	73
4.6	1.46667	330.833	58
1.2	1.46667	317.267	63
1.2	1.46667	300.267	57
<0,03	1.46667	269.3	59
15.7	1.46667	220	65
<0,03	1.46667	185.3	68
8.2	1.46667	113.6	70
1.5	1.46667	94.0667	63
2.8	1.46667	70.9333	56
1.9	1.46667	53.8667	58
1.2	1.46667	45.9667	43
1.1	1.5	452.333	31
1.6	1.5	445.533	89
0.92	1.5	419.233	58
3.4	1.5	401.467	46
1.5	1.5	377.367	50
2.6	1.5	376.7	25
2.1	1.5	333.667	48
3.4	1.5	311.967	54
1	1.5	311.867	62
1.8	1.5	253.467	44
1.6	1.5	238.633	43
0.31	1.5	204.633	46
1.6	1.5	194.2	61
0.46	1.5	112.2	38
2.6	1.5	89.0667	59
3.7	1.5	47.3	40
3.2	1.5	11.3333	53
2.9	1.5	4.53333	72
5.8	1.5	2.06667	74
1.3	1.53333	466.133	33
2.5	1.53333	462.8	57
13.3	1.53333	426.433	92
0.82	1.53333	388	43
2	1.53333	340.267	59
5.7	1.53333	331.967	35
7.6	1.53333	323.067	27
3.8	1.53333	308.267	74
2.4	1.53333	285.6	43
1.2	1.53333	243.267	27
3.5	1.53333	215.7	53
1	1.53333	99	65
2.1	1.53333	93.9333	39
0.82	1.53333	88.2667	61
0.81	1.53333	82.5333	68
1.2	1.53333	72.8333	70
1.3	1.53333	65.5	58
2.4	1.53333	61.8333	78
0.72	1.53333	59.4	40
3.7	1.53333	44.0667	51
0.59	1.53333	40.5333	44
1.4	1.53333	28.7667	54
1	1.53333	28.2333	33
2	1.53333	7.63333	38
4.5	1.53333	1.16667	74
1	1.56667	385.1	23
1.9	1.56667	378.1	54
1.1	1.56667	351.933	22
1.4	1.56667	348.9	46
1.6	1.56667	348.4	21
1.8	1.56667	295.6	79
2.5	1.56667	261.533	52
1.7	1.56667	243.967	36
2.5	1.56667	235.2	33
3.2	1.56667	232.467	72
0.12	1.56667	217.967	55
2.5	1.56667	216.967	80
1.3	1.56667	210.4	63
0.07	1.56667	142.633	68
2.2	1.56667	133.2	52
4	1.56667	126.6	67
0.78	1.56667	112.167	68
0.29	1.56667	104.5	38
2.7	1.56667	97.1667	60
2	1.56667	82.3	69
2.1	1.56667	52.3	60
0.99	1.56667	19.6667	56
1.8	1.6	456.567	53
2.5	1.6	454.3	49
1.1	1.6	452.133	29
1.8	1.6	448.7	36
5.7	1.6	446.767	45
0.81	1.6	407.033	69
0.13	1.6	406.833	29
2.8	1.6	381.1	60
2	1.6	350.733	56
0.63	1.6	342.367	42
1.7	1.6	341.333	66
0.37	1.6	324.3	28
0.66	1.6	275.433	49
3.1	1.6	271.1	20
2.1	1.6	263.467	66
3.5	1.6	249.233	68
<0,03	1.6	225.967	80
1.6	1.6	218.5	75
4.6	1.6	187.533	54
0.9	1.6	130.5	40
2.8	1.6	101.567	31
1.2	1.6	91.5333	60
1.4	1.6	66.3667	46
1	1.6	61.5667	35
8.5	1.6	53.5333	38
1.6	1.6	2.16667	71
2.3	1.63333	467.167	25
1.7	1.63333	466.967	57
<0,03	1.63333	441.467	51
6.2	1.63333	425.8	55
1.6	1.63333	423.7	54
0.71	1.63333	422.4	81
1.6	1.63333	415.733	35
1.3	1.63333	401.133	20
0.75	1.63333	295.667	22
94.2	1.63333	275.567	44
0.66	1.63333	266.633	84
2.1	1.63333	258.767	38
1.9	1.63333	257.133	42
1.7	1.63333	254.5	49
6.9	1.63333	236.133	77
1.3	1.63333	217.1	70
2	1.63333	111.333	70
1.6	1.63333	98.6667	56
1.7	1.63333	93	69
1.7	1.63333	92.2333	41
3.5	1.63333	77.8667	54
4.6	1.63333	74.7	51
1.9	1.63333	53.4333	52
2.5	1.63333	42.6667	47
2.1	1.63333	6.83333	72
2.6	1.66667	412.567	48
2.7	1.66667	347.1	57
0.93	1.66667	342.067	73
1.4	1.66667	341.1	75
0.57	1.66667	303.633	45
3.7	1.66667	283.1	45
9.6	1.66667	252.667	39
9.6	1.66667	252.667	39
1.2	1.66667	215.167	43
0.06	1.66667	213.333	25
1.8	1.66667	193.033	53
3.4	1.66667	151.633	80
2.9	1.66667	103.533	33
<0,03	1.66667	99	64
1.4	1.66667	94.5333	70
2.5	1.66667	87.2667	29
1.5	1.66667	60.4333	22
3	1.66667	57.2667	31
2.9	1.66667	54.5333	29
2.3	1.66667	54.5	64
4.7	1.66667	43.8333	59
2.6	1.66667	17.8667	47
2.9	1.66667	2.73333	77
1.3	1.7	442.5	68
5.7	1.7	436.467	45
5.4	1.7	357.267	55
1.5	1.7	342.5	50
2.3	1.7	341.4	78
2.7	1.7	322.067	34
2.7	1.7	289.633	81
0.78	1.7	284.167	60
2.4	1.7	249.067	45
0.94	1.7	130.567	22
3.1	1.7	97.6333	41
18.9	1.7	86.1667	55
2	1.7	82.6	65
2.3	1.7	75.7667	54
1.4	1.7	56.1667	31
<0,03	1.7	49.4333	60
5.6	1.7	47	35
1.3	1.7	44.3	65
1.8	1.7	35.6	67
1.9	1.7	13.8333	35
6.6	1.7	12.4667	47
1.5	1.73333	436.433	26
0.87	1.73333	429.267	56
1.6	1.73333	420.167	69
1.4	1.73333	414.933	73
2.6	1.73333	400.8	29
2.9	1.73333	391.367	45
0.3	1.73333	384.267	57
1.5	1.73333	379.7	31
0.47	1.73333	335.367	43
<0,03	1.73333	327.2	63
1.4	1.73333	325.233	39
1.7	1.73333	267.167	24
1.5	1.73333	257.5	30
5.9	1.73333	251.5	84
3.5	1.73333	243.567	44
1.6	1.73333	238.533	70
1.3	1.73333	168.433	41
0.53	1.73333	161.133	79
2.7	1.73333	116.7	42
3.8	1.73333	76.2333	60
13.7	1.73333	62.6	46
5.9	1.73333	59.0667	50
1.5	1.73333	54.2667	45
2.5	1.73333	3.43333	28
2.8	1.73333	2.73333	23
1.8	1.73333	2.73333	55
2.1	1.73333	2.4	60
5.5	1.76667	456.833	35
0.53	1.76667	453.867	30
2.7	1.76667	452.367	55
2	1.76667	442.633	64
1.9	1.76667	424.8	82
9.7	1.76667	419.5	44
2.7	1.76667	403.2	54
9.1	1.76667	380.9	20
1.2	1.76667	353.433	67
2.8	1.76667	291.533	76
1.3	1.76667	278.333	67
3.6	1.76667	256.9	29
1.5	1.76667	249.467	63
2.5	1.76667	211.1	74
0.65	1.76667	154.433	72
1.3	1.76667	135.1	51
6	1.76667	97.4667	54
0.84	1.76667	97	79
6.8	1.76667	85.1	37
22	1.76667	58.3333	30
0.99	1.76667	53.4333	52
2.3	1.76667	3.7	68
1.1	1.8	454.267	28
1.6	1.8	444.767	59
2.9	1.8	440.933	26
1.5	1.8	423.533	55
0.6	1.8	421.867	59
0.38	1.8	415.8	84
1.8	1.8	414.667	44
1.6	1.8	409.033	57
1.5	1.8	409.033	57
3.4	1.8	403.233	34
1.8	1.8	402.167	70
0.39	1.8	390.933	35
3.6	1.8	385	20
1	1.8	357.967	79
2.5	1.8	348.367	48
3.2	1.8	341.967	60
1.8	1.8	326.867	62
1.7	1.8	261.233	86
0.16	1.8	254.933	63
2	1.8	204.033	24
1.3	1.8	201.333	60
9.3	1.8	156.633	74
2.1	1.8	146.5	25
0.29	1.8	116.4	82
2.6	1.8	95.2333	53
2.3	1.8	77.7667	53
2.6	1.8	76.8667	42
4.1	1.8	68.4333	40
2.6	1.8	54.9333	80
1.2	1.8	44.1333	55
1.3	1.8	31.1667	37
2.8	1.8	25.6	85
0.91	1.8	9.76667	58
1.5	1.83333	443.633	47
1.6	1.83333	433.3	72
1	1.83333	389.267	28
1	1.83333	389.267	28
0.67	1.83333	360.633	29
1.9	1.83333	255.067	73
1.1	1.83333	242.467	49
0.91	1.83333	230.1	68
5.2	1.83333	211.767	74
1.3	1.83333	188.767	62
0.3	1.83333	124.767	70
1.3	1.83333	111.5	73
0.94	1.83333	105.033	72
0.99	1.83333	101.567	49
3.2	1.83333	97.0333	28
1.9	1.83333	82.8333	21
0.33	1.83333	67.6333	47
2.5	1.83333	60.6	35
3.6	1.83333	47.7333	20
2	1.83333	33.0333	58
4.2	1.83333	22.9667	48
4.4	1.83333	10.8	57
19	1.83333	2.46667	45
1.8	1.86667	474.7	52
<0,03	1.86667	458.533	63
2.2	1.86667	431.133	24
1.6	1.86667	429.667	88
1.2	1.86667	401.133	56
1.1	1.86667	395.433	69
<0,03	1.86667	341.733	52
0.82	1.86667	318.333	51
1.7	1.86667	285.667	41
1.3	1.86667	259.167	79
2.1	1.86667	256.6	45
2.2	1.86667	249.5	59
9.9	1.86667	219.833	83
0.96	1.86667	188.633	81
1.4	1.86667	148.1	47
1.5	1.86667	141.5	73
2.6	1.86667	134.5	57
0.71	1.86667	128.533	79
1.4	1.86667	126.933	30
2.2	1.86667	104.3	50
2.5	1.86667	100.8	20
2.7	1.86667	99.1333	43
0.86	1.86667	96.4667	35
2.4	1.86667	85.9333	35
3.7	1.86667	73.7333	72
1.7	1.86667	45.8333	27
2.1	1.86667	17	25
6.5	1.86667	14.7333	68
1.3	1.9	445.6	35
2.7	1.9	399.6	32
<0,03	1.9	394.567	37
0.08	1.9	353.8	60
0.87	1.9	346.867	56
1.7	1.9	308.767	36
0.78	1.9	296.9	28
2.1	1.9	292.4	21
1.5	1.9	264.067	34
1.7	1.9	262.333	38
1.7	1.9	203.8	23
<0,03	1.9	193.233	27
<0,03	1.9	172.433	57
1.1	1.9	161	31
18.2	1.9	136.4	74
1.6	1.9	131.167	57
3.2	1.9	85.6667	62
0.22	1.9	62.9333	64
3.2	1.9	58.6667	74
2.4	1.9	50.7	27
0.92	1.9	40.9333	59
2	1.9	24.6	45
1.4	1.9	17.8333	85
4.6	1.9	12.2333	47
71.3	1.93333	450.067	60
1.2	1.93333	446.967	52
0.99	1.93333	427.067	66
1.5	1.93333	426.333	56
1.7	1.93333	406.733	47
2.8	1.93333	395.2	33
2.6	1.93333	369.533	57
0.86	1.93333	351.667	61
2.4	1.93333	331.2	28
5.6	1.93333	291.7	63
1.3	1.93333	261.033	67
1.7	1.93333	250.1	54
1.3	1.93333	236.433	63
2.6	1.93333	232.4	36
1.9	1.93333	215.633	69
1.1	1.93333	138.133	30
1.1	1.93333	113.333	68
0.7	1.93333	93.3667	33
0.37	1.93333	89.9	80
1.5	1.93333	80.4667	53
2.5	1.93333	77.5667	74
2.7	1.93333	73.8333	26
1.8	1.93333	73.0333	53
6.9	1.93333	52.7	41
0.51	1.93333	27.8667	56
0.92	1.93333	25.8	70
2	1.93333	13.7	57
1.4	1.96667	455.667	65
3.7	1.96667	455.267	30
2.4	1.96667	335.867	38
2	1.96667	310.467	31
0.85	1.96667	282.1	72
3.5	1.96667	274.867	95
0.61	1.96667	259.833	33
1.3	1.96667	243.767	70
0.97	1.96667	215.2	57
1.1	1.96667	213.8	52
0.43	1.96667	137.767	75
2.7	1.96667	108.7	43
2.9	1.96667	104.7	35
0.19	1.96667	93.9667	57
6.6	1.96667	87.4333	28
0.04	1.96667	61.3667	50
1.8	1.96667	57.2667	37
4.1	1.96667	55.1333	48
2.6	1.96667	54.3333	25
1.6	1.96667	51.3	32
0.97	1.96667	14.4667	59
29.2	1.96667	6.23333	60
0.97	1.96667	5	27
0.4	1.96667	2.5	58
2.4	2	443.667	87
0.62	2	421.533	51
0.71	2	413	49
1.7	2	396.133	61
2.2	2	330.267	33
3.6	2	286.567	72
2.2	2	255.667	28
0.82	2	165.567	72
1.2	2	146.633	72
3	2	136.3	37
1.8	2	135.5	55
1.4	2	132.567	78
4.3	2	96.3	29
1.7	2	41.1333	47
1.2	2	22.3333	57
2	2	19.5333	54
<0,03	2.03333	445.867	55
1.1	2.03333	435.833	67
1	2.03333	421.9	56
1.3	2.03333	403.7	70
1.8	2.03333	394.667	81
3.2	2.03333	311.667	69
2	2.03333	309.5	66
1.8	2.03333	287.933	22
1	2.03333	281.1	57
0.81	2.03333	271.1	81
2.4	2.03333	244.567	76
1.8	2.03333	235	20
1.1	2.03333	228.167	28
4.1	2.03333	207.5	44
<0,03	2.03333	202.2	66
2.3	2.03333	167.533	61
0.35	2.03333	115.267	48
0.12	2.03333	97.2667	72
1.3	2.03333	94.5667	33
0.8	2.03333	74.5	35
1.9	2.03333	58.2333	26
5.6	2.03333	35.4333	49
0.49	2.03333	15.1	74
1.9	2.06667	476.2	65
4.2	2.06667	452.367	30
2	2.06667	438.733	51
1.9	2.06667	418.133	47
0.7	2.06667	410.333	32
0.76	2.06667	401	64
0.25	2.06667	386.6	23
<0,03	2.06667	330.1	41
0.92	2.06667	262.933	80
7.1	2.06667	247.467	60
1.6	2.06667	238.167	70
1.7	2.06667	230.933	56
2.6	2.06667	224.133	32
1.5	2.06667	216.533	86
0.96	2.06667	175.533	71
7.7	2.06667	133	73
0.98	2.06667	126.1	48
2.6	2.06667	120.067	77
0.24	2.06667	102.9	69
1.6	2.06667	98.3	44
2.3	2.06667	82.6667	32
1.6	2.06667	67.8	43
5	2.06667	64.3333	49
1.7	2.06667	12.5	35
0.77	2.1	461.733	41
0.99	2.1	455.433	68
0.97	2.1	443.933	51
0.75	2.1	414.333	56
1.2	2.1	410.533	31
2.3	2.1	347.867	64
1.3	2.1	344.8	46
2.5	2.1	341.9	21
0.42	2.1	313.767	76
3.4	2.1	301.733	45
1.5	2.1	300.1	21
0.76	2.1	277.633	74
<0,03	2.1	251.533	70
<0,03	2.1	214.867	45
2.4	2.1	193.5	70
5	2.1	170.367	45
0.99	2.1	163.067	41
2.9	2.1	106.067	72
0.85	2.1	83.6667	41
5.7	2.1	72.8667	77
1.8	2.1	4.23333	50
2.1	2.13333	464.633	46
5.4	2.13333	366	33
2.5	2.13333	323.767	74
5.7	2.13333	285.567	54
2.2	2.13333	168.267	22
1.4	2.13333	132.8	63
6.7	2.13333	112.433	86
0.05	2.13333	111.2	83
1.2	2.13333	104.033	75
1.9	2.13333	71.0333	75
5.3	2.13333	56.2333	84
1.6	2.13333	54.5333	39
1.2	2.13333	44.4667	70
1.5	2.13333	41.9333	39
1.4	2.13333	33.2333	50
0.76	2.13333	27.4	57
2.3	2.13333	3.06667	34
2	2.16667	427.333	41
2.9	2.16667	426.433	55
1.3	2.16667	424.567	78
2.2	2.16667	419.467	59
3.5	2.16667	417.7	43
1.3	2.16667	257.3	67
1.8	2.16667	233.133	70
<0,03	2.16667	219.367	90
0.74	2.16667	215.033	35
1.4	2.16667	209.3	24
1.1	2.16667	201.133	77
3.1	2.16667	181.967	67
1.7	2.16667	178.967	61
1.3	2.16667	152.833	77
0.82	2.16667	109.967	77
1.5	2.16667	109.5	80
1.6	2.16667	87.4667	61
1.9	2.16667	80.8333	41
3.2	2.16667	63.5333	71
1.6	2.16667	43.3333	32
1.3	2.16667	30.6	60
1	2.2	418.567	76
0.51	2.2	334.1	28
0.56	2.2	318.5	50
3.9	2.2	261.367	77
0.95	2.2	258.467	48
0.95	2.2	243	56
0.07	2.2	230.9	45
1.3	2.2	223.367	32
1.6	2.2	203.6	36
2.8	2.2	202.533	86
1.3	2.2	197.433	66
1.4	2.2	182.467	77
1.6	2.2	173.167	53
4.4	2.2	112.9	43
2.1	2.2	105.867	74
1.5	2.2	96.4333	50
2.6	2.2	87.2	53
4.4	2.2	83.9	45
1.9	2.2	74.9667	54
1	2.2	30.1333	36
1.2	2.2	27.8667	66
2.1	2.2	4.23333	41
1.8	2.23333	467.333	37
2.4	2.23333	452.967	46
1	2.23333	437.367	49
0.04	2.23333	382.667	66
1.5	2.23333	347.867	28
0.86	2.23333	336.067	62
1.9	2.23333	331.133	23
1.6	2.23333	322.1	39
2.1	2.23333	310.267	37
1.8	2.23333	277.2	29
1.1	2.23333	261.167	67
1	2.23333	253.333	70
2.9	2.23333	247.9	61
4.2	2.23333	246.667	42
0.96	2.23333	222.033	33
3.7	2.23333	168.833	63
0.24	2.23333	168.7	45
2	2.23333	146.9	53
2.2	2.23333	146.6	46
2.6	2.23333	124.333	52
0.87	2.23333	102.167	49
4.1	2.23333	76.4333	50
2	2.23333	55.1667	40
2	2.23333	35.1	42
0.72	2.23333	26.1333	72
2.2	2.23333	22.7667	52
<0,03	2.23333	21.7	59
1.9	2.26667	448.2	66
2	2.26667	411.733	61
3.9	2.26667	402.067	50
1.6	2.26667	354.167	44
1.5	2.26667	296.467	56
0.19	2.26667	285	88
2.6	2.26667	232.767	31
2	2.26667	173.467	62
1.3	2.26667	166.8	51
1.9	2.26667	151.3	20
1.9	2.26667	150.167	57
0.57	2.26667	147.033	70
1.6	2.26667	125.1	29
<0,03	2.26667	123.967	60
3.8	2.26667	118.867	32
0.93	2.26667	81.2667	73
1.7	2.26667	80.9333	55
3.1	2.26667	42.2667	56
1.3	2.26667	32.4667	42
5.7	2.26667	19.9333	55
1.2	2.3	472.933	48
0.7	2.3	443.233	47
1.2	2.3	424.4	30
3	2.3	416.7	70
1.3	2.3	410.933	39
2.3	2.3	410.7	53
1.9	2.3	387.9	40
1.3	2.3	352.333	60
1.5	2.3	298.467	66
1.6	2.3	268	37
2.7	2.3	234.333	81
0.04	2.3	215.733	73
<0,03	2.3	198.767	67
2.8	2.3	191.4	74
1.1	2.3	173.867	61
0.65	2.3	145.7	50
1.3	2.3	139.933	84
2.5	2.3	85.2333	85
1.9	2.3	81.9667	53
2.8	2.3	50.8333	88
0.87	2.3	42.5	44
3.6	2.3	34.4333	56
4.4	2.3	23.0333	37
1.5	2.3	12	73
5.6	2.33333	475.067	28
0.71	2.33333	460.033	79
1.9	2.33333	430.367	64
1.6	2.33333	423.267	92
4.5	2.33333	412.1	33
1.9	2.33333	400.867	34
6	2.33333	357	47
1.1	2.33333	352.267	26
1.1	2.33333	342.067	66
0.84	2.33333	314.3	66
1.4	2.33333	234.333	73
0.11	2.33333	218.433	74
3.8	2.33333	210.3	63
1.7	2.33333	182.133	23
1	2.33333	165.333	43
2.3	2.33333	151.533	85
3	2.33333	129	78
1.6	2.33333	121.2	82
4.2	2.33333	111.267	51
2.4	2.33333	99.7333	29
0.96	2.33333	96.5333	34
3	2.33333	94	33
0.55	2.33333	91.9333	44
1	2.33333	87.4	34
1.7	2.33333	79.4333	37
25.9	2.33333	73.7667	35
1.2	2.33333	72.7333	71
3.4	2.33333	59.4	38
0.06	2.33333	57.8	50
1.2	2.33333	52.9333	36
2.5	2.33333	23.4	57
1.6	2.33333	20.2	69
3.2	2.33333	10	53
2	2.33333	4.03333	57
1.3	2.36667	460	65
1.3	2.36667	438.933	26
<0,03	2.36667	399.967	32
2.7	2.36667	319.9	53
2.5	2.36667	313.567	77
3.5	2.36667	313.467	52
0.8	2.36667	303.133	33
2.8	2.36667	284.933	49
2.2	2.36667	279.6	69
2.7	2.36667	249.2	32
0.88	2.36667	245.433	47
5.3	2.36667	227.267	24
2.7	2.36667	200.433	58
4.9	2.36667	158.467	67
1.4	2.36667	129.033	77
0.06	2.36667	114.767	50
1.7	2.36667	111.567	26
0.63	2.36667	103.833	37
<0,03	2.36667	86.1333	36
1	2.36667	62.8333	24
1.4	2.36667	53.1333	61
3	2.36667	3.46667	56
1.6	2.4	436.767	47
1.1	2.4	420.767	53
1.5	2.4	410.867	33
1.8	2.4	384.233	90
3.6	2.4	307.5	42
1.2	2.4	306.067	56
0.39	2.4	302.633	40
5	2.4	289.733	79
5	2.4	289.733	79
2.9	2.4	270.533	51
2.1	2.4	253.567	40
3.7	2.4	253.033	49
0.85	2.4	244.933	40
0.49	2.4	237.2	78
1.2	2.4	223.333	45
2.1	2.4	168.167	59
2.9	2.4	155.767	26
1.4	2.4	114.3	53
2.9	2.4	103.267	56
0.49	2.4	98.4	70
2.5	2.4	88.4667	52
1.9	2.4	79.5	71
4.2	2.4	64.2	68
2.2	2.4	56.5	45
1.3	2.4	54.2667	70
<0,03	2.4	28.6333	49
<0,03	2.4	28.6333	49
4.2	2.4	4.2	60
0.87	2.43333	421.833	37
0.59	2.43333	398.233	78
0.16	2.43333	366.6	69
0.4	2.43333	357.567	38
1.7	2.43333	351.633	53
2	2.43333	331.267	44
1.5	2.43333	322.467	72
2.9	2.43333	284.433	35
2.1	2.43333	276.667	38
12.6	2.43333	274.167	48
0.81	2.43333	242.533	30
1.1	2.43333	235.033	58
1.6	2.43333	234.733	40
0.36	2.43333	222.267	35
2.5	2.43333	222	54
0.67	2.43333	213.9	80
1.1	2.43333	194.333	59
2.5	2.43333	192.867	57
2.6	2.43333	125.733	72
2.5	2.43333	125.733	72
0.95	2.43333	96.7333	64
5.1	2.43333	79.9	42
0.88	2.43333	63.5667	49
2.1	2.43333	53.2667	64
0.9	2.43333	47.4667	34
1.7	2.46667	449.567	54
1.1	2.46667	425.667	63
1.9	2.46667	424.8	28
1	2.46667	399.133	88
7	2.46667	382.6	29
2.5	2.46667	364.367	61
0.99	2.46667	364.367	20
1.9	2.46667	333.967	68
1.2	2.46667	331	64
0.12	2.46667	306.9	83
1.5	2.46667	260.667	83
1.2	2.46667	251.6	49
2.2	2.46667	248.233	55
0.04	2.46667	242.833	86
2.5	2.46667	240.033	20
2.8	2.46667	231.033	57
1.8	2.46667	220.4	42
0.35	2.46667	216.133	80
0.98	2.46667	159.533	34
0.15	2.46667	147.233	58
0.69	2.46667	110.3	30
0.59	2.46667	108.167	31
1.1	2.46667	89.4333	74
2.2	2.46667	87.6667	52
0.89	2.46667	85.8333	77
0.46	2.46667	80.7667	53
2.1	2.46667	69.1333	33
2.6	2.46667	62.8333	45
0.14	2.46667	17.7667	52
0.48	2.46667	3.73333	67
0.73	2.5	415.7	71
1.1	2.5	414.233	82
0.25	2.5	388.8	36
0.86	2.5	367.067	58
2.4	2.5	300.633	55
1.6	2.5	253.467	73
1.3	2.5	235.867	64
0.44	2.5	227.267	66
1.2	2.5	216.733	31
1.9	2.5	191.1	50
1.3	2.5	183.833	71
1.4	2.5	108.833	55
1.2	2.5	81.6667	37
0.49	2.5	68.0333	35
0.53	2.5	66.3	60
2.1	2.5	58.5	22
0.7	2.5	50.9333	62
1.2	2.5	33.2	53
3.2	2.5	31.8	61
2.2	2.5	4.13333	42
1.3	2.53333	451.467	50
1.5	2.53333	450.367	49
6	2.53333	419.6	88
36.3	2.53333	410.967	26
0.03	2.53333	362.2	35
1	2.53333	345.9	85
0.26	2.53333	337.133	95
3.8	2.53333	331.633	25
0.91	2.53333	325.1	73
1.8	2.53333	318.9	57
1.3	2.53333	309.633	78
1.6	2.53333	297.4	21
1.4	2.53333	264.3	51
3.6	2.53333	255.2	20
2.5	2.53333	253.433	67
5.2	2.53333	217.633	55
3.9	2.53333	172.7	52
1.6	2.53333	167.467	33
1	2.53333	159.033	43
5.2	2.53333	142.967	57
1.3	2.53333	141.367	63
3.8	2.53333	92.8667	76
1.9	2.53333	47.5	58
1.6	2.53333	42.6667	56
1.5	2.53333	41.4	60
3.4	2.53333	40.9	22
1.2	2.53333	31.3667	21
<0,03	2.56667	444.1	63
2.7	2.56667	409.833	22
1.7	2.56667	388.633	25
3	2.56667	361.167	91
1.5	2.56667	348.967	56
2.1	2.56667	334.5	51
2.9	2.56667	262.333	40
2.9	2.56667	262.333	40
3.1	2.56667	259.7	83
3.1	2.56667	165.067	52
3.7	2.56667	163.3	51
1.3	2.56667	112.067	47
2.2	2.56667	95.5667	36
2.8	2.56667	91.2667	29
0.06	2.56667	60.1667	55
1.7	2.56667	57.4667	44
15.9	2.56667	55.0667	48
15.8	2.56667	55.0667	48
15.7	2.56667	55.0667	48
4.3	2.56667	43.0667	38
0.94	2.56667	3.53333	45
1.4	2.56667	2.4	49
15.8	2.6	471	70
2.2	2.6	397.9	29
1.7	2.6	386	44
0.34	2.6	352.467	67
3	2.6	334.067	74
3	2.6	314.567	71
5.1	2.6	260.667	37
1	2.6	259.6	35
2.6	2.6	252.867	31
7.2	2.6	199.1	75
0.93	2.6	196.367	55
1.6	2.6	176.667	36
0.64	2.6	150.567	65
0.15	2.6	148.433	50
1.5	2.6	96.4	42
2.8	2.6	86.4	37
5.2	2.6	86.2333	60
1.6	2.6	79.2	59
1.3	2.6	67.9	68
2.1	2.6	66.3	65
0.91	2.6	64.9	67
0.55	2.6	21.8	31
1.2	2.63333	470.9	61
1.7	2.63333	457.933	37
1.1	2.63333	451.4	53
0.93	2.63333	410.833	37
0.25	2.63333	390.3	40
<0,03	2.63333	360.433	32
3.3	2.63333	358.867	52
10.1	2.63333	341.1	65
0.76	2.63333	326.8	69
21.7	2.63333	304.067	20
2.2	2.63333	254.933	60
7.1	2.63333	246.767	83
0.08	2.63333	237.933	50
1.6	2.63333	203.6	47
3.8	2.63333	163.567	67
0.04	2.63333	74.1	47
1.4	2.63333	70.5333	59
5.4	2.63333	68.6	50
0.55	2.63333	62.6333	34
0.83	2.63333	56.9667	50
6.6	2.63333	47.2	52
4.1	2.63333	17.3	59
3	2.63333	7.56667	65
5.7	2.66667	465.267	33
1	2.66667	455.833	88
1.3	2.66667	448.433	47
3.9	2.66667	447	70
1.5	2.66667	439.533	30
2.1	2.66667	411.867	20
2.7	2.66667	395.8	79
2.8	2.66667	348.5	36
1.6	2.66667	335.767	37
1.2	2.66667	329.867	21
0.83	2.66667	313.2	47
4	2.66667	257.1	41
0.66	2.66667	246.633	38
2.3	2.66667	215.9	74
1.3	2.66667	120.767	35
3.9	2.66667	93.1	56
1.2	2.66667	84.1667	28
1.8	2.66667	83.0667	70
3.5	2.66667	69.3667	61
1.6	2.66667	61.0667	67
<0,03	2.66667	50.9	50
1.1	2.66667	28.6667	33
1.8	2.66667	25.5667	32
4.3	2.66667	19.3667	59
0.83	2.7	400.833	57
0.46	2.7	395.933	60
<0,03	2.7	358.4	44
1.5	2.7	320	55
1.5	2.7	279.267	38
1.5	2.7	266.133	70
0.88	2.7	248.4	60
0.87	2.7	248.4	60
2.2	2.7	230.1	68
5.4	2.7	220.533	60
10.3	2.7	219.667	44
1.1	2.7	190.267	61
0.49	2.7	179.367	84
2	2.7	150.7	85
1.6	2.7	115.333	62
0.98	2.7	113.433	42
0.4	2.7	110.333	33
0.97	2.7	90.4	39
66.5	2.7	61.0333	84
0.79	2.7	52.2	49
3.1	2.7	39.7667	72
2.7	2.7	9.23333	72
1.2	2.73333	460.467	28
1.5	2.73333	457.2	48
3.3	2.73333	396.667	44
1.5	2.73333	396.333	74
2.4	2.73333	386.867	53
2.6	2.73333	314.067	58
3.7	2.73333	298.3	54
1.8	2.73333	280.833	25
0.97	2.73333	273.7	69
0.54	2.73333	270.933	57
15.2	2.73333	250.667	62
2.2	2.73333	250.267	53
14	2.73333	165.133	79
0.62	2.73333	153.767	68
0.71	2.73333	153.433	81
1.6	2.73333	145.1	42
>100	2.73333	135.9	36
<0,03	2.73333	131.833	89
4.5	2.73333	119.5	76
11.2	2.73333	94.9	71
1.7	2.73333	90.9	50
1.7	2.73333	89.5667	40
1.3	2.73333	55.4667	75
1.6	2.73333	49.5333	45
3.5	2.73333	37.0333	27
3.1	2.73333	18.4333	56
2.4	2.73333	15.2333	67
0.12	2.73333	4.1	70
3.4	2.73333	1.46667	59
0.75	2.76667	469.367	20
0.45	2.76667	411.967	60
1.1	2.76667	389.933	45
2	2.76667	387.133	43
0.49	2.76667	322.533	40
2.7	2.76667	310.733	49
0.92	2.76667	286.1	61
1.3	2.76667	282.9	31
2.9	2.76667	250.3	41
1.8	2.76667	214.633	46
2.8	2.76667	204.5	74
4	2.76667	188.633	76
1.6	2.76667	182.6	62
1.4	2.76667	182.2	77
1.7	2.76667	152.7	37
3.2	2.76667	136.433	64
<0,03	2.76667	125.967	66
1.9	2.76667	121.633	35
1.5	2.76667	111.233	57
0.91	2.76667	96.3	79
6.1	2.76667	92.6	27
1.9	2.76667	90.4667	60
0.33	2.76667	24.0333	49
2.3	2.76667	20.4	25
0.87	2.8	472.267	57
0.86	2.8	472.267	57
1.5	2.8	433.133	65
1.9	2.8	417.933	67
0.2	2.8	405.733	37
0.39	2.8	391.633	32
2.2	2.8	323.133	57
1.3	2.8	270.2	29
1.2	2.8	254.1	34
1.2	2.8	254.1	34
0.78	2.8	236.433	52
1.4	2.8	225.667	47
1.9	2.8	217.933	67
0.63	2.8	168.433	85
1.8	2.8	155.533	82
0.47	2.8	143.033	62
1.4	2.8	124.533	64
0.63	2.8	93.8667	68
1.1	2.8	82.4333	52
1	2.8	81.6333	50
2.4	2.8	68.8667	35
1.9	2.8	40.0667	44
1	2.83333	466.2	68
1.8	2.83333	439.667	43
19.5	2.83333	418.9	74
2.3	2.83333	406.233	28
0.2	2.83333	402.933	30
5.9	2.83333	387.633	54
4.4	2.83333	342.333	20
1.3	2.83333	310.4	48
2.4	2.83333	298.7	28
1.2	2.83333	282.233	30
4.4	2.83333	281.3	80
1.1	2.83333	274.5	22
2.7	2.83333	271.433	70
5.7	2.83333	173.033	53
0.66	2.83333	167.167	78
1.7	2.83333	156.133	28
4.7	2.83333	150.467	65
1.8	2.83333	111.1	50
3	2.83333	84.3	65
11.1	2.83333	54.1	74
1.7	2.86667	460.3	36
0.96	2.86667	446	49
1.3	2.86667	445.2	20
0.08	2.86667	429.933	52
0.63	2.86667	422.933	66
0.95	2.86667	401.267	60
0.78	2.86667	337.233	74
5	2.86667	336.8	31
0.35	2.86667	316.3	38
0.69	2.86667	314.2	64
0.83	2.86667	282.767	66
0.55	2.86667	235.067	44
2.8	2.86667	230.667	66
0.09	2.86667	227.967	68
0.05	2.86667	221.267	32
2.8	2.86667	146	29
0.85	2.86667	129.8	28
0.72	2.86667	129.8	28
0.55	2.86667	119.6	66
0.56	2.86667	116.467	67
2.3	2.86667	86.3	59
0.13	2.86667	67.0667	45
3.7	2.86667	59.0667	66
0.94	2.86667	57.9333	33
0.22	2.86667	5.6	75
2.5	2.86667	3.13333	71
3.4	2.9	454.867	73
1.8	2.9	416.267	21
3.5	2.9	383.633	55
0.4	2.9	331.667	75
0.77	2.9	322.133	88
1.3	2.9	312.233	57
4.8	2.9	310.6	51
1.6	2.9	197.233	70
1.7	2.9	191	50
2.1	2.9	149.4	36
1.3	2.9	126.167	39
0.52	2.9	117.533	88
<0,03	2.9	114.6	64
1.5	2.9	111.2	68
0.49	2.9	108.667	70
1.1	2.9	105.333	50
2.1	2.9	104.333	60
6.7	2.9	99.7333	35
1.9	2.9	93.0667	47
25.4	2.9	80.9333	64
2.9	2.9	54.8333	83
2.2	2.9	48	72
<0,03	2.9	35.9	63
4.3	2.9	18	58
0.19	2.9	3.86667	52
3	2.93333	457.233	38
0.71	2.93333	402.867	48
2.1	2.93333	388.2	76
1.3	2.93333	368.7	57
1.8	2.93333	353.133	50
2	2.93333	342.733	30
1.1	2.93333	324.167	74
1.9	2.93333	307.7	80
0.08	2.93333	278.633	39
0.82	2.93333	262.267	68
0.95	2.93333	244.633	68
1.2	2.93333	216.567	45
<0,03	2.93333	207.367	54
1.5	2.93333	165.5	73
1	2.93333	123.767	66
3.4	2.93333	88.4333	36
8.3	2.93333	75.7333	65
0.82	2.93333	68.3333	39
2.6	2.93333	66.1333	70
3.1	2.93333	66.1	57
3.7	2.93333	3.7	35
0.97	2.96667	414.767	23
1.3	2.96667	406.4	61
1.8	2.96667	404.767	49
1.7	2.96667	381.767	61
3.9	2.96667	316.667	36
0.91	2.96667	253.133	42
<0,03	2.96667	244.2	66
0.76	2.96667	243.9	45
0.19	2.96667	242.7	47
1.6	2.96667	242.333	55
0.44	2.96667	191.2	66
0.55	2.96667	187.1	57
2.6	2.96667	162.1	35
2.7	2.96667	149.167	56
2	2.96667	145.1	53
0.53	2.96667	132.2	29
0.93	2.96667	115.567	62
1.2	2.96667	104.5	46
1.2	2.96667	91.7667	56
1.5	2.96667	89.8	45
0.78	2.96667	80.3667	61
1.2	2.96667	79.8667	70
3	2.96667	71.1333	36
1.7	2.96667	68.9667	65
2.6	2.96667	68.3667	67
1.8	2.96667	44.1667	45
2.5	2.96667	35.8	61
0.58	2.96667	35.7333	78
6.5	3	458.467	60
1	3	452.833	75
1.8	3	438.833	59
0.87	3	428.533	49
2.5	3	392.067	48
3.2	3	388.3	20
<0,03	3	383.633	70
1.9	3	373	57
1.4	3	350.233	43
0.81	3	309.367	71
1.8	3	302.1	40
1.5	3	274	92
2.3	3	258.933	40
3.6	3	256.8	86
1.3	3	255.5	80
1.3	3	225.867	35
0.8	3	223.6	50
0.99	3	198.833	41
0.69	3	179.8	64
1.9	3	164.033	58
0.3	3	144.2	76
0.74	3	103.467	36
0.89	3	96.2667	68
0.86	3	65.7333	37
1.7	3	61.6667	71
2.1	3	52.8667	45
3.3	3	35.0667	35
2.7	3	12.1667	71
2.6	3	9.5	52
0.47	3	4.16667	58
1.4	3	3.63333	71
1.2	3	3.23333	76
3.1	3.03333	451.3	63
0.22	3.03333	434.5	31
<0,03	3.03333	375.667	31
8.1	3.03333	345.167	38
1.1	3.03333	343.133	40
3.2	3.03333	338.433	42
1.1	3.03333	299.4	35
1.3	3.03333	290.733	62
0.64	3.03333	273.433	72
2.1	3.03333	255.933	69
0.94	3.03333	254.167	70
<0,03	3.03333	237.867	47
0.4	3.03333	232.1	83
2.4	3.03333	230.033	80
1.6	3.03333	224.667	47
1.3	3.03333	223.333	39
1.1	3.03333	216.433	71
2.5	3.03333	205.733	65
0.97	3.03333	159.533	65
2.2	3.03333	108.967	44
1.5	3.03333	105.967	55
2.3	3.03333	97.2	38
0.86	3.03333	83.3333	78
1.5	3.03333	75.1667	73
3.3	3.03333	63.9333	71
11.2	3.03333	15.3	25
0.83	3.06667	459.133	55
1.3	3.06667	443.033	58
1.6	3.06667	441.567	31
1.2	3.06667	430.367	42
1.9	3.06667	395.433	20
18.5	3.06667	390.567	64
1.2	3.06667	379.467	52
1.3	3.06667	348.6	41
3.1	3.06667	328.033	20
1.2	3.06667	314.8	41
1.3	3.06667	306	51
0.81	3.06667	290.033	43
0.68	3.06667	266.4	57
1.7	3.06667	243.067	34
0.49	3.06667	234	26
1.3	3.06667	148.733	35
3.5	3.06667	125	32
1.4	3.06667	104.1	38
3.5	3.06667	101.6	35
4.9	3.06667	99.7333	59
3.6	3.06667	65.7	73
1.2	3.06667	62.3	44
2.7	3.06667	20.5333	62
1.6	3.06667	18.7333	73
1.1	3.1	448.1	48
0.85	3.1	406.233	63
14.7	3.1	403.5	30
1.2	3.1	366.2	21
0.28	3.1	338.7	27
1.4	3.1	326.333	23
1.5	3.1	324.133	67
2.1	3.1	318.633	33
1	3.1	304.433	67
2.2	3.1	270.833	67
0.29	3.1	266.5	66
1.1	3.1	239.133	72
4.4	3.1	219.367	48
0.94	3.1	209.733	21
0.18	3.1	165.167	31
7.3	3.1	112.633	30
11.1	3.1	104.533	47
0.88	3.1	78.3667	35
9.5	3.1	77.2	36
0.28	3.1	76.4333	53
1.6	3.1	70.5333	37
1.3	3.1	69.6667	25
1.6	3.1	68.1667	74
0.62	3.1	63.7333	45
0.55	3.1	55.4333	46
2.4	3.1	54.8	77
0.74	3.1	48.3333	59
2.2	3.1	26.7	64
1.5	3.1	5.06667	42
1.4	3.13333	465.033	45
<0,03	3.13333	415.633	63
3.2	3.13333	396	42
<0,03	3.13333	390.033	39
1.7	3.13333	382.2	49
1.5	3.13333	346.9	68
2.7	3.13333	342.733	31
6.9	3.13333	302.7	42
<0,03	3.13333	272.633	80
0.99	3.13333	256.367	78
1.2	3.13333	226.533	50
2.9	3.13333	207.333	39
1.1	3.13333	200.967	42
0.59	3.13333	175.167	70
0.86	3.13333	153.367	57
0.49	3.13333	147.767	61
0.36	3.13333	138.967	93
2.1	3.13333	124.9	28
1.3	3.13333	123.6	41
0.71	3.13333	110.267	32
1	3.13333	90.2667	86
1.4	3.13333	70.2333	37
3.3	3.13333	39.4667	78
0.19	3.13333	4	70
0.78	3.16667	459.367	63
2	3.16667	445.767	52
2.4	3.16667	441.733	70
4.6	3.16667	435.367	42
1.3	3.16667	433.167	73
2.2	3.16667	414.533	40
1.1	3.16667	403.567	20
2.7	3.16667	389.733	64
2	3.16667	385.1	50
0.76	3.16667	378.267	64
4.7	3.16667	350.167	65
1.6	3.16667	316.967	74
0.81	3.16667	307.4	84
1.2	3.16667	278.3	49
2.2	3.16667	261.967	32
1.7	3.16667	260.567	62
0.72	3.16667	258.967	36
13.9	3.16667	251.767	65
1.2	3.16667	251.267	58
4.8	3.16667	246.633	61
0.9	3.16667	212.867	27
0.81	3.16667	190.333	25
1	3.16667	173.967	61
2.1	3.16667	168.667	57
0.79	3.16667	140.533	29
0.99	3.16667	119.467	47
0.61	3.16667	119.067	73
2.5	3.16667	96.8667	40
2.9	3.16667	94.5	49
2.3	3.16667	86.7333	41
1.3	3.16667	76.6667	52
0.93	3.16667	71.7	61
1.9	3.16667	28.1	49
0.24	3.16667	10.7	58
0.91	3.16667	5.9	46
0.93	3.2	429.7	73
2.1	3.2	422.667	48
<0,03	3.2	413.9	71
0.66	3.2	411.733	52
0.7	3.2	332.8	61
1.5	3.2	311.933	38
5.2	3.2	305.667	38
1.7	3.2	272.133	48
1.1	3.2	248.867	65
<0,03	3.2	244.767	64
1.6	3.2	229.167	38
1.4	3.2	196.133	59
0.9	3.2	151.667	43
2.4	3.2	107.6	49
1.6	3.2	107.267	65
1.6	3.2	84.9667	48
<0,03	3.2	84.7333	29
12.4	3.2	78.9	83
0.23	3.2	69.6667	35
2.4	3.2	53.9333	54
1.4	3.2	29.0333	70
1.4	3.2	19.4333	64
2	3.23333	461.367	48
1.4	3.23333	456.667	56
0.62	3.23333	445.5	81
0.67	3.23333	435.233	28
1.3	3.23333	428.333	44
3.3	3.23333	408.567	39
>100	3.23333	407.233	48
0.84	3.23333	405.533	49
2.4	3.23333	393.833	49
0.85	3.23333	385.567	42
2.1	3.23333	356.733	85
0.81	3.23333	331.7	84
0.8	3.23333	331.7	84
1.7	3.23333	327.633	40
3	3.23333	289.333	23
2.5	3.23333	288.8	50
2	3.23333	285.3	49
1.7	3.23333	285.2	31
2.4	3.23333	265.833	37
0.28	3.23333	264.067	65
0.55	3.23333	237.8	45
<0,03	3.23333	235.567	52
1.1	3.23333	226.767	79
2.3	3.23333	145.2	70
0.03	3.23333	131.9	83
4.5	3.23333	124.333	28
0.93	3.23333	99.1333	67
4.7	3.23333	88.6667	33
1.7	3.23333	76.3	69
6.1	3.23333	73.0333	49
1.5	3.23333	69	27
3	3.23333	54.3667	32
2.2	3.23333	53.0667	22
3.1	3.23333	41.3667	71
2.8	3.23333	5.16667	33
1.5	3.23333	3.63333	59
0.71	3.26667	468.367	80
1.4	3.26667	459.933	47
3	3.26667	459.2	49
1.1	3.26667	425.3	57
22.1	3.26667	419.433	55
0.07	3.26667	405.167	40
1	3.26667	394.2	54
3.2	3.26667	391.167	31
3.4	3.26667	379.1	54
0.9	3.26667	344.433	75
2.4	3.26667	310	58
1.5	3.26667	304.267	61
2.3	3.26667	303.067	26
0.54	3.26667	295.433	51
1.5	3.26667	293.833	54
3.4	3.26667	283.1	22
2.1	3.26667	270.767	39
0.58	3.26667	251.767	48
3.3	3.26667	243.1	70
2.3	3.26667	239.667	69
1.8	3.26667	223.3	69
3	3.26667	219.633	39
0.7	3.26667	217.567	69
1.5	3.26667	158.633	65
0.81	3.26667	151.267	66
0.07	3.26667	138.633	65
0.73	3.26667	104.367	62
0.84	3.26667	78.4667	27
4.6	3.26667	72.1333	60
2.4	3.26667	65.1	54
1.8	3.26667	62.5667	45
3	3.26667	53.7667	60
3.8	3.26667	45.5667	33
2.7	3.26667	28.6	49
0.78	3.26667	25.6	57
2.5	3.26667	17.1333	47
5.1	3.26667	16.2	59
1	3.3	478.133	31
6	3.3	473.733	46
1.4	3.3	471.5	53
1.2	3.3	465.4	47
1.3	3.3	426.067	25
1.1	3.3	389.733	36
9.2	3.3	377.167	71
0.96	3.3	343.067	62
10.4	3.3	299.133	67
0.8	3.3	278.433	47
0.82	3.3	244.9	60
1.9	3.3	230.1	63
1	3.3	184.7	55
0.46	3.3	184.133	55
3.4	3.3	151.433	51
1.5	3.3	126.933	40
1.4	3.3	123.167	26
1.4	3.3	123.167	26
3.2	3.3	117.933	54
>100	3.3	97.9333	53
0.6	3.3	84.7333	35
33	3.3	83.4	35
4.6	3.3	64.2333	21
0.52	3.3	51.7667	57
2.1	3.3	50.8	31
2.1	3.3	39.2667	72
0.29	3.3	11.6333	51
3.8	3.3	8.3	67
1.5	3.3	3.5	58
1.6	3.33333	464.9	33
11.8	3.33333	439.033	47
0.82	3.33333	408.967	72
2	3.33333	359.933	47
3.3	3.33333	331.533	89
0.7	3.33333	288.667	74
2.6	3.33333	279.4	71
4.7	3.33333	262.533	21
3.3	3.33333	260.7	82
2.7	3.33333	248.367	31
0.81	3.33333	240.8	55
3.4	3.33333	237.2	63
2	3.33333	223.8	78
0.87	3.33333	207.233	83
1.7	3.33333	202.733	62
1.1	3.33333	145.5	25
2.1	3.33333	112.5	36
6.4	3.33333	112.2	62
1.4	3.33333	98.9	61
2.3	3.33333	82.4	72
1.6	3.33333	70.5	46
4.9	3.33333	67.9	70
2.4	3.33333	57.9	78
1.4	3.33333	48.6333	56
0.91	3.33333	34.5	56
0.77	3.33333	27.7667	36
4.1	3.33333	6.8	49
1.9	3.36667	450.367	53
2	3.36667	449.233	52
1.5	3.36667	439.033	32
3.1	3.36667	432.5	47
1.9	3.36667	424.233	36
0.52	3.36667	414.867	80
3.8	3.36667	407.633	100
1.1	3.36667	340.167	29
2.3	3.36667	339.667	57
1.7	3.36667	320.833	26
2.9	3.36667	303.267	32
3.1	3.36667	300.2	64
1.1	3.36667	265.667	47
2.2	3.36667	259.833	33
1.4	3.36667	248.767	35
2.5	3.36667	238.3	51
1.9	3.36667	226.333	21
0.33	3.36667	149.5	20
1.6	3.36667	139.4	68
1.7	3.36667	117.3	68
3.8	3.36667	94.8333	62
4.4	3.36667	83.9667	35
2.1	3.36667	74.9	45
0.99	3.36667	69.4	35
2	3.36667	53.8333	62
1.7	3.36667	20.0667	47
3	3.36667	16.5333	60
1.7	3.36667	4.26667	40
0.55	3.4	466.1	33
1.9	3.4	435.333	27
3.3	3.4	421.933	50
0.69	3.4	367.8	38
5.7	3.4	351.133	60
0.42	3.4	327.4	46
0.61	3.4	319.333	63
0.78	3.4	298.267	63
0.67	3.4	287.767	34
1.9	3.4	268.567	47
2.3	3.4	264.9	35
1.9	3.4	264.367	61
0.12	3.4	264.3	39
1.8	3.4	253.567	61
<0,03	3.4	245.867	71
1.7	3.4	231.6	53
<0,03	3.4	216.167	53
2.6	3.4	180.3	29
3.8	3.4	144.833	64
1.4	3.4	125.133	44
3.3	3.4	123.967	75
1.9	3.4	102.7	32
1.6	3.4	92.8	57
4.8	3.4	87.7	84
1.4	3.4	83.8333	63
1.3	3.4	51.9667	27
1.3	3.4	46.2	72
5.3	3.4	24.9333	52
16.1	3.4	24.0667	46
1.8	3.4	8.46667	62
2.2	3.4	4.46667	49
1	3.43333	429.433	85
2.5	3.43333	419.667	41
1.1	3.43333	413.167	54
<0,03	3.43333	299.4	66
1.8	3.43333	264.367	77
1.8	3.43333	261.167	50
<0,03	3.43333	247.467	80
0.08	3.43333	245.433	23
1.7	3.43333	245.133	92
2.5	3.43333	233.667	59
4.6	3.43333	232.033	88
1.4	3.43333	226.3	45
1.9	3.43333	225.9	58
0.75	3.43333	214.533	26
0.25	3.43333	202.267	48
1.2	3.43333	194.7	29
<0,03	3.43333	185.1	64
1.9	3.43333	178.867	71
0.56	3.43333	152.833	63
3.2	3.43333	117.233	36
0.65	3.43333	108.633	58
1	3.43333	99.4667	78
3.4	3.43333	92.6	64
0.93	3.43333	77.3	70
3	3.43333	76.8333	69
9	3.43333	71.8333	36
2.3	3.43333	71.6667	65
0.78	3.43333	63.9333	30
0.28	3.43333	62.9333	74
0.28	3.43333	62.9333	74
0.89	3.43333	48.4	74
1.7	3.43333	46.9333	48
1	3.43333	39.8667	64
2.5	3.43333	37.4	48
2.4	3.43333	2.7	56
1.2	3.46667	469.833	43
0.92	3.46667	462.333	60
1.9	3.46667	434.733	85
1.5	3.46667	429.5	59
1.7	3.46667	425.333	31
0.78	3.46667	409.967	30
1	3.46667	403.3	48
2.9	3.46667	393	67
0.26	3.46667	385.733	48
0.48	3.46667	363.567	40
1.3	3.46667	363.367	58
<0,03	3.46667	348.4	57
2.3	3.46667	285	70
2.2	3.46667	277.533	27
2	3.46667	262.367	48
0.71	3.46667	241.067	71
2.5	3.46667	227.2	74
3.5	3.46667	141.2	53
3.1	3.46667	88.0333	52
4	3.46667	84.2	72
3.4	3.46667	83.4667	57
0.32	3.46667	75.9333	60
6.6	3.46667	56.2333	59
2.2	3.46667	35.4	29
1	3.46667	4.03333	61
1.9	3.5	468.633	70
1.8	3.5	464.033	28
2.5	3.5	444.167	46
1.8	3.5	433.733	21
1.3	3.5	422.9	35
0.51	3.5	402.6	33
1	3.5	379.733	86
3.6	3.5	340.8	42
1.8	3.5	291.933	22
0.15	3.5	273.533	88
0.83	3.5	272.367	45
1.7	3.5	261.733	39
1.9	3.5	253.467	43
0.62	3.5	239.933	32
2.9	3.5	229.633	21
3.5	3.5	202.933	32
2.4	3.5	195.867	54
3.1	3.5	176.433	65
3.8	3.5	147	36
3.6	3.5	127.367	48
1.1	3.5	121.933	69
2	3.5	94.7	49
2.5	3.5	37.4667	74
4.3	3.5	11.2	39
8	3.53333	466.9	78
2.2	3.53333	452.933	26
2.6	3.53333	420.7	59
1.4	3.53333	414.433	50
3.5	3.53333	407.1	57
3.6	3.53333	398.833	20
1	3.53333	384.367	33
1.1	3.53333	381.533	67
2.4	3.53333	361.767	42
1.8	3.53333	343.133	49
4	3.53333	342.367	41
0.9	3.53333	318	64
0.84	3.53333	297.8	72
1.7	3.53333	290.933	59
2.4	3.53333	270.8	31
<0,03	3.53333	263	58
4.7	3.53333	247.667	84
2.1	3.53333	232.2	25
1.6	3.53333	230.2	81
1.5	3.53333	184.8	63
11.3	3.53333	158.8	71
2.2	3.53333	114.9	76
2.2	3.53333	110.8	61
1.8	3.53333	96.4667	45
3	3.53333	92.1667	67
2.3	3.53333	88.6667	68
3.2	3.53333	56.7667	33
0.31	3.53333	32.8667	27
0.39	3.56667	459.833	61
0.26	3.56667	433.4	45
1.3	3.56667	428.4	23
0.79	3.56667	425.533	63
0.06	3.56667	387.6	68
<0,03	3.56667	378.4	52
3	3.56667	353.633	42
3.1	3.56667	323.167	72
2	3.56667	304.267	58
2	3.56667	304.267	58
0.89	3.56667	276.3	66
1.5	3.56667	262.933	72
1.5	3.56667	257	54
3.4	3.56667	248.833	73
1	3.56667	204.2	78
1.2	3.56667	191.667	28
1.3	3.56667	167.067	83
2.9	3.56667	145	47
3	3.56667	120.833	81
5.3	3.56667	118.4	77
0.51	3.56667	113.4	48
1.9	3.56667	96.7667	53
0.77	3.56667	84.3333	83
4	3.56667	64.3667	77
1.7	3.56667	62.5	30
[truncated: 18,021 more rows]

## Sheet: Calcium
Calcium
Result (mmol/L)	Rest time (min)	Minutes after 7am	Age
2.67	0.1	360.033	3
2.39	0.166667	164.4	47
2.32	0.2	404.2	55
2.25	0.333333	249.4	34
2.34	0.333333	257.467	90
2.28	0.433333	213.167	61
2.24	0.466667	61.9333	27
2.36	0.6	77.0333	52
2.27	0.6	100.967	54
2.13	0.6	122.067	36
2.37	0.6	362.7	9
2.26	0.6	400.067	30
2.49	0.633333	130.2	81
2.33	0.633333	165.2	50
2.25	0.633333	171.8	77
2.37	0.633333	355	51
2.31	0.633333	408.167	66
2.35	0.666667	330.933	56
2.4	0.7	23	31
2.39	0.7	67.2667	35
2.26	0.7	84.8667	32
2.27	0.7	89.1	74
2.38	0.7	106.7	88
2.27	0.7	455.267	25
2.24	0.733333	60.3667	59
2.35	0.733333	191.767	76
2.33	0.733333	245.933	20
2.41	0.733333	386.9	59
2.33	0.766667	60.5333	71
2.35	0.766667	250.8	21
2.24	0.766667	316.767	47
2.29	0.766667	337.133	42
2.15	0.8	0.3	61
2.21	0.8	61.3667	45
2.39	0.8	117.833	60
2.39	0.8	222.967	64
2.34	0.8	362.5	29
2.38	0.833333	10.1667	72
2.27	0.833333	92.4667	50
2.37	0.833333	204.767	72
2.41	0.833333	265.5	42
2.51	0.833333	415.2	4
2.1	0.866667	31.8	85
2.39	0.866667	53.9	73
2.28	0.866667	88.2	16
2.33	0.866667	151.5	31
2.11	0.866667	226.667	28
2.22	0.866667	438.667	17
2.36	0.866667	475.267	50
2.49	0.9	1.16667	55
2.17	0.9	23.6667	67
2.25	0.9	43.3667	57
2.13	0.9	56.7333	64
2.31	0.9	90.9	78
2.23	0.9	97.1667	78
2.29	0.9	107.4	45
2.37	0.9	235.133	28
2.46	0.9	240.367	19
2.47	0.9	269.533	64
2.4	0.9	318.467	72
2.54	0.933333	66.7	77
2.47	0.933333	67.6667	49
2.32	0.933333	69.6	27
2.18	0.933333	115.367	84
2.39	0.933333	143.833	21
2.35	0.933333	186.267	67
2.25	0.933333	349.4	26
2.21	0.966667	61.7333	41
2.2	0.966667	62.3667	42
2.34	0.966667	84.7	73
2.34	0.966667	187.5	72
2.2	0.966667	217.8	91
2.3	0.966667	255.167	69
2.4	0.966667	276.1	44
2.25	0.966667	283	28
2.28	0.966667	316.833	82
2.49	0.966667	418.367	54
2.29	0.966667	436.533	51
2.44	0.966667	469.033	19
2.28	1	7.5	77
2.12	1	68.9	43
2.36	1	87.8333	47
2.19	1	165.967	3
2.6	1	265.767	63
2.07	1.03333	1.73333	65
2.28	1.03333	15.8333	64
2.12	1.03333	26.2667	48
2.22	1.03333	162.067	34
2.51	1.03333	178.4	60
2.35	1.03333	240.233	21
2.37	1.03333	266.4	4
2.1	1.03333	272.033	47
2.55	1.03333	325.967	54
2.27	1.03333	343.767	35
2.34	1.06667	28.4667	32
2.28	1.06667	59.7667	53
2.4	1.06667	116.067	74
2.68	1.06667	201.433	71
2.22	1.06667	261.2	80
2.29	1.06667	264.8	45
2.36	1.06667	272.167	72
2.36	1.06667	319	35
2.32	1.06667	379.133	67
2.39	1.1	60.0667	44
2.36	1.1	67.4	73
2.1	1.1	83.1667	28
2.29	1.1	328.8	49
2.32	1.1	330.333	24
2.14	1.1	391.033	77
2.33	1.1	432.8	20
2.31	1.13333	1.9	77
2.27	1.13333	40.6333	17
2.31	1.13333	53.7667	80
2.19	1.13333	56.4333	73
2.35	1.13333	76.9333	94
2.06	1.13333	88.1667	18
2.19	1.13333	110.933	77
2.27	1.13333	137.9	52
2.37	1.13333	378.167	83
2.31	1.13333	381.833	35
2.18	1.13333	395.8	58
2.31	1.13333	449.167	27
2.32	1.13333	472.3	28
2.49	1.13333	475.067	1
2.39	1.16667	3.8	64
2.51	1.16667	64.8	60
2.23	1.16667	75.3333	61
2.4	1.16667	129.967	68
2.24	1.16667	260.533	71
2.46	1.16667	308.9	37
2.39	1.16667	391.8	72
2.45	1.2	31.1667	70
2.19	1.2	44.0333	37
2.22	1.2	64.2	83
2.16	1.2	128.667	86
2.31	1.2	231.933	43
2.43	1.2	255.1	21
2.47	1.2	302.467	23
2.25	1.2	320.167	36
2.38	1.2	348.1	64
2.16	1.2	395.367	67
2.21	1.2	437.733	25
2.28	1.2	455.633	19
2.26	1.2	466.467	31
2.17	1.23333	21.8333	75
2.26	1.23333	63.3333	75
2.41	1.23333	64.4667	51
2.28	1.23333	92.1333	29
2.22	1.23333	99.9	28
2.19	1.23333	115.667	47
2.24	1.23333	410.9	28
2.3	1.23333	432.8	17
2.26	1.23333	432.8	17
2.32	1.23333	456.233	21
2.3	1.26667	2.56667	39
2.24	1.26667	54.0667	33
2.4	1.26667	65.0333	38
2.2	1.26667	140.667	3
2.32	1.26667	211.7	35
2.24	1.26667	324.5	39
2.33	1.26667	348	70
2.32	1.26667	455.733	41
2.32	1.26667	463	39
2.29	1.26667	472.933	45
2.18	1.3	1.96667	66
2.19	1.3	2.13333	83
2.21	1.3	3.2	77
2.33	1.3	15.8333	38
2.3	1.3	22.9	55
2.43	1.3	59.8	56
2.45	1.3	78.9	46
2.43	1.3	130.333	54
2.38	1.3	211.9	54
2.36	1.3	263.167	65
1.98	1.33333	2.1	58
2.27	1.33333	2.36667	62
2.66	1.33333	51.5	56
2.17	1.33333	128.633	69
2.37	1.33333	137.933	10
2.31	1.33333	146.233	80
2.4	1.33333	158.933	59
2.29	1.33333	368.9	29
2.23	1.33333	396.967	58
2.32	1.33333	404.3	57
2.31	1.33333	414.767	13
2.29	1.33333	433.267	36
2.32	1.36667	45	40
2.25	1.36667	66.4333	21
2.31	1.36667	164.533	44
2.39	1.36667	218.3	72
2.31	1.36667	244.833	94
2.41	1.36667	257	18
2.25	1.36667	260.267	78
2.4	1.36667	271.567	34
2.33	1.36667	351.733	35
2.37	1.36667	416.033	47
2.26	1.36667	419.967	29
2.49	1.36667	430.5	3
2.39	1.36667	431.9	2
2.32	1.4	12.5	54
2.44	1.4	24.1	59
2.2	1.4	61.3	49
2.11	1.4	270	63
2.48	1.4	275.8	82
2.36	1.4	311.767	68
2.41	1.4	336.133	7
2.23	1.4	375.6	55
2.34	1.4	424.267	45
2.44	1.43333	3.63333	54
2.27	1.43333	43.8667	17
2.28	1.43333	87.5333	80
2.12	1.43333	90.5667	47
2.21	1.43333	114.833	22
2.41	1.43333	137.533	36
2.32	1.43333	137.533	36
2.42	1.43333	165.867	61
2.34	1.43333	186.133	34
2.27	1.43333	230.3	66
2.39	1.43333	359.167	61
2.46	1.43333	439.967	28
2.38	1.43333	456.6	31
2.13	1.46667	15.2667	51
2.32	1.46667	53.8667	58
2.35	1.46667	58.8667	83
2.26	1.46667	83.0667	54
2.49	1.46667	94.0667	63
2.17	1.46667	117.1	71
2.2	1.46667	253.767	64
2.3	1.46667	317.267	63
2.28	1.46667	340.633	73
2.32	1.46667	350.6	36
2.45	1.46667	369.467	20
2.56	1.46667	392.367	51
2.56	1.46667	406.5	58
2.35	1.46667	409.5	34
2.31	1.46667	437.767	65
2.21	1.5	2.1	77
2.26	1.5	52.5	78
2.44	1.5	89.0667	59
2.28	1.5	102.8	80
2.27	1.5	106.1	73
2.19	1.5	194.2	61
2.27	1.5	253.467	44
2.39	1.5	311.867	62
2.29	1.5	401.467	46
2.58	1.5	427.3	62
2.44	1.5	445.533	89
2.27	1.5	451.233	7
2.2	1.53333	7.63333	38
2.29	1.53333	61.8333	78
2.37	1.53333	65.5	58
2.2	1.53333	77.9333	74
2.19	1.53333	82.5333	68
2.23	1.53333	93.9333	39
2.35	1.53333	144.533	64
2.39	1.53333	243.267	27
2.16	1.53333	250.633	54
2.28	1.53333	285.6	43
2.49	1.53333	303.5	61
2.34	1.53333	388.667	11
2.43	1.53333	462.8	57
2.38	1.53333	466.133	33
2.49	1.56667	19.6667	56
2.39	1.56667	52.3	60
2.57	1.56667	82.3	69
2.23	1.56667	91.8333	54
2.31	1.56667	124.967	69
2.37	1.56667	142.633	68
2.28	1.56667	210.4	63
2.41	1.56667	217.967	55
2.52	1.56667	348.4	21
2.37	1.56667	351.933	22
2.23	1.56667	356.067	77
2.32	1.56667	378.1	54
2.34	1.56667	385.1	23
2.36	1.56667	450.2	1
2.25	1.6	44.2667	28
2.22	1.6	66.3667	46
2.39	1.6	152.5	63
2.51	1.6	230.867	66
2.23	1.6	263.467	66
2.37	1.6	271.1	20
2.45	1.6	275.433	49
2.32	1.6	276.6	62
2.47	1.6	349.8	70
2.36	1.6	448.7	36
2.4	1.6	452.133	29
2.59	1.63333	3.1	60
2.34	1.63333	25.2667	86
2.22	1.63333	42.6667	47
2.42	1.63333	52.9333	15
2.24	1.63333	53.5	52
2.41	1.63333	88.5	7
2.47	1.63333	111.333	70
2.2	1.63333	118.1	87
2.3	1.63333	169.767	37
2.31	1.63333	202.7	9
2.35	1.63333	217.1	70
2.1	1.63333	266.633	84
2.39	1.63333	371.033	24
2.23	1.63333	401.133	20
2.23	1.63333	447.633	15
2.28	1.66667	2.73333	77
2.35	1.66667	60.4333	22
2.18	1.66667	78.5667	71
2.27	1.66667	82.6	22
2.28	1.66667	103.533	33
2.17	1.66667	193.033	53
2.04	1.66667	194.333	39
2.3	1.66667	207.8	6
2.37	1.66667	211.767	22
2.33	1.66667	248.867	63
2.39	1.66667	297.1	19
2.31	1.66667	342.067	73
2.49	1.66667	347.1	57
2.35	1.66667	412.567	48
2.21	1.7	35.6	67
2.3	1.7	47	35
2.3	1.7	56.1667	31
2.52	1.7	237.967	58
2.66	1.7	239.5	87
2.28	1.7	254.033	77
2.4	1.7	460.433	14
2.29	1.73333	2.73333	23
2.44	1.73333	54.2667	45
2.1	1.73333	116.7	42
2.4	1.73333	156.867	15
2.48	1.73333	161.133	79
2.36	1.73333	168.433	41
2.79	1.73333	246.033	70
2.44	1.73333	267.167	24
2.37	1.73333	325.233	39
2.25	1.73333	326.533	33
2.51	1.73333	335.333	2
2.26	1.73333	388.967	47
2.35	1.73333	400.8	29
2.35	1.73333	400.833	31
2.35	1.73333	436.433	26
2.42	1.76667	2.46667	69
2.3	1.76667	53.1667	67
2.47	1.76667	53.4333	52
2.3	1.76667	53.6	43
2.31	1.76667	55.7667	45
2.26	1.76667	76.8667	73
2.32	1.76667	154.433	72
2.31	1.76667	198.033	85
2.44	1.76667	290.7	58
2.47	1.76667	336.467	13
2.29	1.76667	419.5	44
2.39	1.76667	442.633	64
2.06	1.76667	453.867	30
2.34	1.76667	466.567	17
2.31	1.8	25.6	85
2.07	1.8	77.7667	53
2.32	1.8	80.2667	36
2.36	1.8	95.2333	53
2.38	1.8	100.133	81
2.27	1.8	146.333	92
2.22	1.8	256.6	58
2.18	1.8	260.533	85
2.44	1.8	284.833	68
2.38	1.8	341.967	60
2.37	1.8	346.4	12
2.17	1.8	348.367	48
2.19	1.8	415.8	84
2.5	1.8	444.767	59
2.09	1.83333	29.6	60
2.23	1.83333	45.5333	67
2.41	1.83333	47.7333	20
2.27	1.83333	211.767	74
2.35	1.83333	360.633	29
2.36	1.83333	388.467	16
2.26	1.83333	389.267	28
2.21	1.83333	407.567	45
2.36	1.83333	443.633	47
2.33	1.83333	462.933	27
2.39	1.86667	17	25
2.21	1.86667	99.1333	43
2.1	1.86667	116.133	80
2.41	1.86667	126.933	30
2.16	1.86667	141.5	73
2.27	1.86667	168.9	62
2.42	1.86667	219.833	83
2.21	1.86667	237.567	87
2.4	1.86667	333.667	37
2.7	1.86667	338.467	86
2.49	1.86667	369.7	19
2.37	1.86667	411.133	49
2.27	1.86667	429.667	88
2.25	1.86667	474.7	52
2.24	1.9	24.6	45
2.35	1.9	31.5	43
2.44	1.9	58.6667	74
2.41	1.9	72.8	73
2.23	1.9	85.6667	62
2.43	1.9	96.2333	69
2.31	1.9	164.2	74
2.24	1.9	203.8	23
2.57	1.9	264.433	68
2.54	1.9	271.633	89
2.5	1.9	292.4	21
2.4	1.9	340.967	64
2.35	1.9	348.9	78
2.32	1.9	358.7	56
2.28	1.9	406.8	36
2.3	1.9	440.2	16
2.64	1.9	453.7	11
2.25	1.93333	13.7	57
2.33	1.93333	24.7	25
2.57	1.93333	25.8	70
2.4	1.93333	27.8667	56
2.28	1.93333	73.8333	26
2.49	1.93333	87.2333	6
2.39	1.93333	113.333	68
2.36	1.93333	113.433	48
2.32	1.93333	137.7	5
2.48	1.93333	227.067	26
2.27	1.93333	232.967	29
2.45	1.93333	291.7	63
2.15	1.93333	308.567	10
2.36	1.93333	309.2	76
2.5	1.93333	369.533	57
2.24	1.93333	412.633	37
2.32	1.93333	438	17
2.32	1.93333	446.967	52
2.27	1.93333	452.367	36
2.31	1.96667	2.5	58
2.45	1.96667	6.23333	60
2.29	1.96667	14.4667	59
2.39	1.96667	51.3	32
2.24	1.96667	53.6	15
2.35	1.96667	54.3333	25
2.4	1.96667	55.1333	48
2.2	1.96667	71	74
2.38	1.96667	91.7	51
2.19	1.96667	93.9667	57
2.38	1.96667	137.767	75
2.3	1.96667	215.2	57
2.36	1.96667	274.867	95
2.62	1.96667	282.1	72
2.34	1.96667	421	42
2.64	1.96667	450.6	57
2.33	2	19.5333	54
2.29	2	41.1333	47
2.34	2	99.9333	35
2.51	2	224.467	73
2.35	2	255.667	28
2.21	2	296.633	46
2.27	2	297.933	5
2.21	2	386.2	37
2.39	2	435.133	17
2.21	2.03333	58.2333	26
2.28	2.03333	70.4667	62
2.16	2.03333	83.8	59
2.42	2.03333	97.2667	72
2.32	2.03333	169.867	31
2.05	2.03333	207.5	44
2.38	2.03333	254.167	28
2.43	2.03333	271.1	81
2.24	2.03333	307.7	30
2.47	2.03333	311.667	69
2.29	2.03333	394.667	81
2.29	2.03333	394.967	38
2.49	2.03333	468.367	53
2.11	2.06667	0.866667	38
2.29	2.06667	43.8333	75
2.41	2.06667	67.8	43
2.27	2.06667	82.6667	32
2.22	2.06667	98.3	44
2.36	2.06667	107.1	41
2.4	2.06667	120.067	77
2.31	2.06667	175.533	71
2.36	2.06667	216.533	86
2.28	2.06667	230.933	56
2.24	2.06667	261.967	66
2.41	2.06667	343.967	66
2.12	2.06667	418.133	47
2.35	2.06667	420.333	55
2.1	2.1	83.6667	41
2.51	2.1	91.8	19
2.26	2.1	106.067	72
2.38	2.1	117.3	7
2.34	2.1	163.067	41
2.17	2.1	226.8	34
2.34	2.1	300.1	21
2.25	2.1	313.767	76
2.41	2.1	328.1	19
2.25	2.1	341.9	21
2.43	2.1	347.867	64
2.25	2.1	411	36
2.49	2.1	443.933	51
2.39	2.13333	27.4	57
2.37	2.13333	54.5333	39
2.11	2.13333	132.8	63
2.24	2.13333	163.8	72
2.36	2.13333	168.267	22
2.24	2.13333	184.133	87
2.53	2.13333	186.333	2
2.27	2.13333	197.067	10
2.45	2.13333	203.667	56
2.31	2.13333	249.733	41
2.42	2.13333	268.7	18
2.45	2.13333	281.567	29
2.44	2.13333	351.533	70
2.3	2.13333	388.467	61
2.33	2.13333	432.3	43
2.3	2.13333	449.433	73
2.16	2.16667	49.5333	58
2.36	2.16667	87.4667	61
2.42	2.16667	99.4667	74
2.38	2.16667	109.5	80
1.92	2.16667	109.967	77
2.39	2.16667	149.6	80
2.25	2.16667	152.833	77
2.45	2.16667	181.967	67
2.27	2.16667	213.133	75
2.21	2.16667	257.3	67
2.35	2.16667	258.333	66
2.27	2.16667	293.967	28
2.32	2.16667	326.967	69
2.36	2.16667	367.2	11
2.29	2.16667	390	40
2.42	2.16667	390.633	22
2.24	2.16667	410	27
2.3	2.16667	416.3	9
2.2	2.16667	418.6	39
2.29	2.16667	424.567	78
2.39	2.16667	426.433	55
2.33	2.16667	452.7	57
2.31	2.2	12.8	64
2.4	2.2	30.1333	36
2.44	2.2	74.9667	54
2.44	2.2	77.2333	8
2.14	2.2	82.0667	43
2.03	2.2	99.9667	69
2.25	2.2	105.867	74
2.33	2.2	197.433	66
2.31	2.2	202.533	86
2.27	2.2	223.367	32
2.47	2.2	304.267	19
2.24	2.2	318.5	50
2.36	2.2	352.367	23
2.55	2.2	360.467	54
2.45	2.2	413.6	76
2.35	2.2	415.4	9
2.35	2.2	418.233	13
2.19	2.2	429.033	48
2.41	2.2	436.4	44
2.5	2.23333	22.7667	52
2.43	2.23333	32.3333	79
2.22	2.23333	42.6333	66
2.33	2.23333	124.333	52
2.29	2.23333	146.9	53
2.49	2.23333	202.233	71
2.29	2.23333	216.633	49
2.36	2.23333	249.367	28
2.36	2.23333	261.167	67
2.32	2.23333	382.667	66
2.32	2.26667	32.4667	42
2.27	2.26667	48.3667	60
2.28	2.26667	55.5	67
2.32	2.26667	118.867	32
2.19	2.26667	147.033	70
2.47	2.26667	163.867	6
2.4	2.26667	287.8	70
2.11	2.26667	293.267	63
2.23	2.26667	309.767	86
2.4	2.26667	354.167	44
2.44	2.26667	418.633	36
2.31	2.26667	448.2	66
2.39	2.3	50.8333	88
2.35	2.3	54.7333	18
2.3	2.3	81.9667	53
2.14	2.3	85.2333	85
2.32	2.3	96.6667	21
2.21	2.3	132.4	85
2.42	2.3	139.833	64
2.37	2.3	139.933	84
2.32	2.3	240.767	28
2.3	2.3	268	37
2.46	2.3	298	75
2.27	2.3	387.9	40
2.35	2.3	415.367	15
2.22	2.3	424.4	30
2.33	2.33333	10	53
2.22	2.33333	20.2	69
2.33	2.33333	23.4	57
2.36	2.33333	72.7333	71
2.27	2.33333	79.4333	37
2.4	2.33333	91.9333	44
2.32	2.33333	111.267	51
2.24	2.33333	129	78
2.25	2.33333	151.533	85
2.29	2.33333	182.033	9
2.48	2.33333	214.433	69
2.37	2.33333	228.633	76
2.38	2.33333	234.333	73
2.2	2.33333	243.667	66
2.18	2.33333	290.333	75
2.17	2.33333	416.6	54
2.14	2.33333	418.333	40
2.52	2.33333	440.567	16
2.54	2.33333	457.9	50
2.49	2.33333	460.033	79
2.48	2.36667	3.46667	56
2.26	2.36667	93.2	56
2.39	2.36667	102.1	75
2.31	2.36667	111.567	26
2.37	2.36667	114.767	50
2.43	2.36667	129.033	77
2.15	2.36667	133.333	60
2.34	2.36667	141.433	20
2.2	2.36667	336.9	25
2.26	2.36667	439.767	26
2.36	2.36667	460	65
2.37	2.4	4.2	60
2.31	2.4	56.5	45
2.19	2.4	64.2	68
2.36	2.4	82.6667	16
2.41	2.4	87.8	84
2.45	2.4	103.267	56
2.39	2.4	237.2	78
2.49	2.4	277.633	73
2.35	2.4	302.633	40
2.29	2.4	308.1	65
2.15	2.4	338.7	60
2.35	2.4	384.233	90
2.34	2.4	411.467	11
2.17	2.4	411.633	17
2.27	2.4	420.767	53
2.42	2.43333	46.3667	73
2.44	2.43333	47.4667	34
2.3	2.43333	53.2667	64
2.2	2.43333	57.3	43
2.38	2.43333	79.9	42
2.24	2.43333	88.0333	68
2.24	2.43333	192.633	87
2.47	2.43333	194.333	59
2.36	2.43333	217.4	6
2.74	2.43333	222	54
2.41	2.43333	234.733	40
2.28	2.43333	235.033	58
2.47	2.43333	242.533	30
2.39	2.43333	252.567	77
2.22	2.43333	276.667	38
2.33	2.43333	322.467	72
2.44	2.43333	331.267	44
2.37	2.43333	362.2	3
2.12	2.43333	414.033	59
2.14	2.43333	419.7	10
2.32	2.43333	443.033	9
2.35	2.46667	9.36667	66
2.21	2.46667	17.7667	52
2.26	2.46667	57.3	47
2.13	2.46667	72.1333	45
2.33	2.46667	85.8333	77
2.32	2.46667	89.4333	74
2.17	2.46667	110.3	30
1.95	2.46667	125.267	57
2.22	2.46667	231.033	57
2.58	2.46667	242.833	86
2.24	2.46667	251.6	49
2.37	2.46667	260.667	83
2.37	2.46667	342	73
2.35	2.46667	364.367	20
2.35	2.46667	364.367	61
2.25	2.5	31.8	61
2.35	2.5	33.2	53
2.33	2.5	70.5	31
2.42	2.5	108.833	55
2.37	2.5	151.667	69
2.24	2.5	227.267	66
2.21	2.5	253.467	73
2.29	2.5	300.633	55
2.21	2.5	308.5	25
1.83	2.5	367.067	58
2.45	2.5	415.7	71
2.35	2.53333	30.1	15
2.25	2.53333	31.3667	21
2.33	2.53333	37.6	50
2.37	2.53333	41.4	60
2.2	2.53333	141.367	63
2.28	2.53333	174.367	53
2.25	2.53333	179.367	2
2.53	2.53333	261.767	77
2.35	2.53333	265.267	36
2.24	2.53333	272.2	90
2.27	2.53333	297.4	21
2.43	2.53333	307.133	4
2.22	2.53333	309.633	78
2.38	2.53333	331.633	25
1.85	2.53333	332.1	16
2.3	2.53333	337.133	95
2.3	2.53333	410.967	26
2.3	2.53333	450.367	49
2.27	2.56667	3.53333	45
2.33	2.56667	5.3	70
2.26	2.56667	43.1667	26
2.15	2.56667	57.4667	44
2.11	2.56667	61.2667	39
2.14	2.56667	88.1333	36
2.24	2.56667	91.2667	29
2.37	2.56667	95.5667	36
2.28	2.56667	112.067	47
2.29	2.56667	174.033	11
2.24	2.56667	321.067	55
2.3	2.56667	372.1	83
2.44	2.56667	422.533	13
2.2	2.56667	449.067	15
2.3	2.56667	458.9	17
2.46	2.6	63.8333	42
2.28	2.6	64.5333	82
2.39	2.6	66.3	65
2.3	2.6	176.667	36
2.26	2.6	196.367	55
2.25	2.6	199.1	75
2.25	2.6	291.467	34
2.32	2.6	322.3	17
2.22	2.6	338.067	41
2.24	2.6	352.467	67
2.45	2.6	404.8	40
2.42	2.63333	7.56667	65
2.45	2.63333	69.8333	83
2.36	2.63333	70.5333	59
2.27	2.63333	75.6	72
2.4	2.63333	177.533	8
2.37	2.63333	204.967	70
2.59	2.63333	297.167	80
2.5	2.63333	304.067	20
2.34	2.63333	326.8	69
2.34	2.63333	410.833	37
2.43	2.63333	421.467	74
2.37	2.63333	441.8	72
2.36	2.63333	459.533	13
2.29	2.63333	461.967	31
2.32	2.63333	470.9	61
2.3	2.66667	19.3667	59
2.42	2.66667	25.5667	32
2.16	2.66667	61.0667	67
2.37	2.66667	83.0667	70
2.29	2.66667	84.1667	28
2.25	2.66667	120.767	35
2.34	2.66667	122.633	36
2.07	2.66667	128.233	42
2.4	2.66667	209	79
2.37	2.66667	215.9	74
2.28	2.66667	221.567	59
2.37	2.66667	234.067	87
2.43	2.66667	243.233	68
2.36	2.66667	262.667	11
2.32	2.66667	313.2	47
2.38	2.66667	348.5	36
2.34	2.66667	439.533	30
2.27	2.66667	468.567	3
2.38	2.7	9.23333	72
2.28	2.7	39.7667	72
2.32	2.7	50.9	36
2.37	2.7	52.2	49
2.41	2.7	61.0333	84
2.35	2.7	96.7333	80
2.23	2.7	113.433	42
2.33	2.7	115.333	62
2.18	2.7	190.267	61
2.39	2.7	220.533	60
2.29	2.7	222.5	83
2.57	2.7	264.6	53
2.29	2.7	279.267	38
2.25	2.7	320	55
2.41	2.7	383.2	23
2.3	2.7	395.933	60
2.23	2.7	413.167	17
2.45	2.73333	21.9333	67
2.22	2.73333	30.1667	50
2.64	2.73333	55.4667	75
2.24	2.73333	90.9	50
2.38	2.73333	94.6	7
2.5	2.73333	119.5	76
2.36	2.73333	125.767	60
2.07	2.73333	135.7	66
2.19	2.73333	145.1	42
2.39	2.73333	153.433	81
2.27	2.73333	153.767	68
2.16	2.73333	218.033	38
2.35	2.73333	250.267	53
2.48	2.73333	250.667	62
2.3	2.73333	271.633	71
2.31	2.73333	280.833	25
2.26	2.73333	298.3	54
2.53	2.73333	360.267	39
2.28	2.73333	380.7	80
2.21	2.73333	396.333	74
2.5	2.73333	396.667	44
2.33	2.73333	400.4	20
2.7	2.73333	438.3	59
2.35	2.73333	461.633	16
2.36	2.76667	20.4	25
2.38	2.76667	90.4667	60
2.14	2.76667	96.1	69
2.41	2.76667	97.3667	64
2.24	2.76667	111.233	57
2.26	2.76667	124.733	91
2.21	2.76667	222.867	64
2.67	2.76667	289.167	61
2.19	2.76667	314.333	67
2.31	2.76667	389.933	45
2.43	2.76667	469.367	20
2.09	2.8	90.1	80
2.34	2.8	93.8667	68
2.36	2.8	104.6	78
2.26	2.8	113.467	89
2.37	2.8	128.367	31
2.45	2.8	131.967	20
2.23	2.8	254.1	34
2.23	2.8	254.1	34
2.47	2.8	300.967	7
2.48	2.8	323.133	57
2.26	2.8	332.867	17
2.05	2.8	345.1	77
2.27	2.8	346.267	55
2.4	2.8	348.8	15
2.07	2.8	433.133	65
2.44	2.8	472.267	57
2.44	2.8	472.267	57
2.38	2.83333	86.9333	68
2.42	2.83333	167.167	78
2.3	2.83333	281.3	80
2.27	2.83333	282.233	30
2.33	2.83333	298.7	28
2.18	2.83333	299.433	36
2.47	2.83333	397.2	82
2.16	2.83333	402.933	30
2.56	2.86667	5.6	75
2.46	2.86667	50.1333	45
2.52	2.86667	65.9333	12
2.21	2.86667	67.0667	45
2.42	2.86667	75.9667	93
2.34	2.86667	84.5333	21
2.42	2.86667	106.533	72
2.35	2.86667	128.733	19
2.21	2.86667	139.8	16
2.43	2.86667	140.6	66
2.41	2.86667	154.6	3
2.3	2.86667	207.533	79
2.31	2.86667	282.767	66
2.08	2.86667	284.8	34
2.14	2.86667	394.033	39
2.46	2.86667	401.267	60
2.42	2.86667	445.2	20
2.27	2.86667	446.3	9
2.26	2.9	18	58
2.43	2.9	48	72
2.22	2.9	85.1	52
2.31	2.9	93.0667	47
2.32	2.9	108.4	41
2.24	2.9	111.2	68
2.32	2.9	117.533	88
2.42	2.9	136.933	49
2.34	2.9	143	50
2.24	2.9	185.267	54
2.47	2.9	245.367	17
2.26	2.9	310.6	51
2.42	2.9	416.267	21
2.26	2.93333	3.7	35
2.28	2.93333	62.1333	73
2.36	2.93333	79.6667	31
2.23	2.93333	123.767	66
2.33	2.93333	165.5	73
2.39	2.93333	185.333	5
2.43	2.93333	220.033	67
2.27	2.93333	270.7	87
2.41	2.93333	276.333	63
2.35	2.93333	304.233	66
2.44	2.93333	353.133	50
2.29	2.93333	402.867	48
2.26	2.93333	457.233	38
2.34	2.96667	44.1667	45
2.36	2.96667	57.0667	51
2.57	2.96667	62.2333	80
2.34	2.96667	71.1333	36
2.44	2.96667	79.8667	70
2.51	2.96667	100.267	29
2.34	2.96667	115.567	62
2.39	2.96667	127.2	39
2.54	2.96667	168.6	10
2.47	2.96667	187.1	57
2.32	2.96667	242.7	47
2.45	2.96667	247.267	53
2.26	2.96667	316.667	36
2.37	2.96667	414.767	23
2.47	3	3.63333	71
2.27	3	9.5	52
2.43	3	12.1667	71
2.25	3	72.4333	12
2.09	3	93.3	71
2.29	3	103.467	36
2.55	3	223.6	50
2.19	3	258.933	40
2.03	3	402.567	42
2.42	3	418.567	8
2.4	3	438.833	59
2.37	3	452.833	75
2.14	3.03333	39.4667	38
2.31	3.03333	63.9333	71
2.16	3.03333	75.1667	73
2.29	3.03333	78.2667	79
2.37	3.03333	86.5667	59
2.46	3.03333	97.2	38
2.26	3.03333	104.733	88
2.28	3.03333	105.967	55
2.09	3.03333	108.967	44
2.2	3.03333	159.533	65
2.36	3.03333	255.933	69
2.32	3.03333	359.667	23
2.25	3.03333	387.733	17
1.94	3.03333	451.3	63
2.28	3.03333	462.167	60
2.34	3.03333	472.433	47
2.37	3.06667	17.5667	41
2.35	3.06667	20.5333	62
2.2	3.06667	26.0333	67
2.43	3.06667	70.2333	51
2.33	3.06667	99.7333	59
2.32	3.06667	104.1	38
2.42	3.06667	105.633	93
2.28	3.06667	107.9	54
2.93	3.06667	111.033	65
2.05	3.06667	116.2	32
2.29	3.06667	148.733	35
2.29	3.06667	239.233	89
2.27	3.06667	290.033	43
2.32	3.06667	314.8	41
2.41	3.06667	335.233	7
2.17	3.06667	348.6	41
2.22	3.06667	354.967	17
2.41	3.06667	372.633	8
2.39	3.06667	390.367	37
1.32	3.06667	399.833	14
2.43	3.06667	409.333	4
2.4	3.06667	449.2	15
2.18	3.06667	459.133	55
2.26	3.1	43.7333	59
2.26	3.1	45.1333	18
2.49	3.1	54.8	77
2.53	3.1	63.7333	45
2.36	3.1	70.5333	37
2.4	3.1	104.7	64
2.42	3.1	165.167	31
2.42	3.1	183.433	84
2.39	3.1	209.733	21
2.33	3.1	239.133	72
2.38	3.1	270.833	67
2.19	3.1	389.867	10
2.28	3.1	406.233	63
2.35	3.1	419.967	15
2.22	3.1	448.1	48
2.2	3.13333	39.4667	78
2.31	3.13333	101.967	15
2.44	3.13333	138.967	93
2.38	3.13333	146.4	71
2.43	3.13333	178.533	7
2.24	3.13333	240.367	17
2.37	3.13333	346.9	68
2.23	3.13333	350.467	32
2.3	3.13333	390.033	39
2.34	3.13333	443.967	55
2.23	3.13333	465.033	45
2.3	3.16667	5.9	46
2.42	3.16667	10.7	58
2.4	3.16667	71.7	61
2.36	3.16667	90.1667	63
2.33	3.16667	92.6333	8
2.11	3.16667	94.5	49
2.4	3.16667	118.6	58
2.24	3.16667	119.467	47
2.17	3.16667	121.4	58
2.41	3.16667	135.167	78
2.54	3.16667	168.667	57
2.44	3.16667	173.967	61
2.3	3.16667	243.8	28
2.31	3.16667	246.633	61
2.48	3.16667	251.267	58
2.36	3.16667	260.567	62
2.77	3.16667	261.3	71
2.36	3.16667	303.9	2
2.4	3.16667	389.733	64
2.29	3.16667	403.567	20
2.27	3.16667	433.167	73
2.34	3.16667	441.733	70
2.44	3.16667	459.367	63
2.25	3.2	107.267	65
2.26	3.2	107.6	49
2.53	3.2	196.133	59
2.3	3.2	215.667	83
2.43	3.2	241.1	60
2.34	3.2	422.667	48
2.15	3.2	429.7	73
2.1	3.2	435.1	29
2.48	3.23333	3.63333	59
2.71	3.23333	5.16667	33
2.37	3.23333	9.43333	52
2.33	3.23333	53.0667	22
2.34	3.23333	69	27
2.27	3.23333	69.4	72
2.4	3.23333	73.0333	49
2.17	3.23333	76.3	69
2.3	3.23333	114.5	67
2.26	3.23333	131.9	83
2.23	3.23333	155.233	12
2.3	3.23333	264.067	65
1.95	3.23333	285.2	31
2.34	3.23333	288.8	50
2.28	3.23333	356.733	85
2.23	3.23333	408.567	39
2.43	3.23333	418.567	31
2.22	3.23333	428.333	44
2.23	3.23333	444.133	9
2.19	3.23333	445.5	81
2.26	3.23333	456.667	32
2.26	3.23333	456.667	56
2.17	3.26667	3.26667	77
2.27	3.26667	72.1333	60
2.46	3.26667	104.633	4
2.51	3.26667	130.767	14
2.23	3.26667	138.633	65
2.12	3.26667	203.433	36
2.37	3.26667	217.567	69
2.46	3.26667	219.633	39
2.44	3.26667	243.1	70
2.32	3.26667	251.767	48
2.36	3.26667	270.767	39
2.27	3.26667	277.233	74
2.46	3.26667	283.633	22
2.15	3.26667	318.867	48
2.38	3.26667	370.367	26
2.64	3.26667	391.167	31
2.29	3.26667	436.367	4
2.26	3.26667	459.933	47
2.37	3.3	3.5	58
2.16	3.3	50.8	31
2.13	3.3	51.3333	32
2.21	3.3	74.7667	83
2.11	3.3	77.3333	26
2.41	3.3	92.7667	71
2.33	3.3	177.333	48
2.21	3.3	180.1	81
2.4	3.3	314.933	12
2.36	3.3	328.7	33
2.25	3.3	343.067	62
2.23	3.3	346.733	36
2.31	3.3	417.9	70
2.25	3.3	426.067	25
2.52	3.3	458.2	17
2.24	3.3	462.067	16
2.18	3.3	465.4	47
2.25	3.3	471.5	53
2.12	3.3	478.133	31
2.39	3.3	479.9	5
2.31	3.33333	34.5	56
2.25	3.33333	48.6333	56
2.52	3.33333	50.7	57
2.41	3.33333	57.9	78
2.39	3.33333	82.0333	71
2.32	3.33333	82.4	72
2.35	3.33333	98.9	61
2.21	3.33333	145.5	25
2.17	3.33333	186.467	39
2.28	3.33333	192.367	5
2.46	3.33333	223.8	78
2.39	3.33333	262.533	21
2.24	3.33333	265.933	86
2.3	3.33333	288.667	74
2.19	3.33333	331.533	89
2.44	3.36667	4.26667	40
2.37	3.36667	6.3	52
2.37	3.36667	20.0667	47
2.31	3.36667	27.4333	41
2.34	3.36667	48.0333	76
2.33	3.36667	62.6667	7
2.26	3.36667	71.3333	77
2.21	3.36667	72.6667	56
2.41	3.36667	92.7667	19
2.27	3.36667	94.8333	62
2.6	3.36667	102.8	48
2.34	3.36667	129.3	64
2.32	3.36667	188.367	80
2.7	3.36667	223.2	80
2.39	3.36667	296.9	4
2.5	3.36667	300.2	64
2.1	3.36667	303.267	32
2.27	3.36667	320.833	26
2.4	3.36667	339.667	57
2.56	3.36667	407.633	100
2.21	3.4	4.46667	49
2.21	3.4	24.9333	52
2.38	3.4	35.6667	7
2.43	3.4	66.3	57
2.4	3.4	69.2	71
2.57	3.4	76.2667	64
2.29	3.4	83.8333	63
2.3	3.4	87.5	83
2.33	3.4	87.7	84
2.4	3.4	123.9	69
2.27	3.4	123.967	75
2.2	3.4	132.567	77
2.27	3.4	176.033	64
2.28	3.4	216.4	40
2.09	3.4	219.867	34
2.51	3.4	230.7	51
2.5	3.4	272.1	36
2.3	3.4	287.767	34
2.32	3.4	319.333	63
2.25	3.4	327.4	46
2.29	3.4	373.167	17
2.23	3.4	435.333	27
2.22	3.43333	7.93333	66
2.48	3.43333	37.4	48
2.28	3.43333	62.9333	74
2.35	3.43333	63.9333	30
2.29	3.43333	76.8333	69
2.29	3.43333	85.4	63
2.33	3.43333	92.6	64
2.26	3.43333	95.7667	38
2.31	3.43333	148.267	87
2.35	3.43333	149.767	56
2.33	3.43333	178.867	71
2.19	3.43333	214.533	26
2.54	3.43333	225.9	58
2.3	3.43333	232.033	88
2.39	3.43333	233.667	59
2.53	3.43333	245.133	92
2.45	3.43333	248.567	16
2.35	3.43333	261.167	50
2.35	3.43333	264.367	77
2.37	3.43333	287.167	37
2.1	3.43333	332.4	64
2.38	3.43333	354.967	14
2.53	3.43333	364.967	80
2.33	3.43333	409.567	7
2.54	3.43333	413.167	54
2.35	3.43333	415.767	15
2.42	3.43333	433.067	17
2.24	3.46667	4.03333	61
2.23	3.46667	11.5333	50
2.24	3.46667	39.1333	58
2.53	3.46667	84.2	72
2.29	3.46667	84.4	76
2.26	3.46667	153.9	52
2.23	3.46667	160.433	80
2.1	3.46667	209.1	83
2.25	3.46667	262.367	48
2.31	3.46667	285	70
2.43	3.46667	339.133	19
2.64	3.46667	363.367	58
2.3	3.46667	427.133	10
2.23	3.46667	434.733	85
2.38	3.46667	462.333	60
2.39	3.46667	469.833	43
2.29	3.5	11.2	39
2.3	3.5	29.9333	43
2.15	3.5	37.4667	74
2.28	3.5	61.1	57
2.33	3.5	75.1667	46
2.15	3.5	121.933	69
2.38	3.5	176.433	65
2.34	3.5	231.133	22
2.36	3.5	234.1	48
2.33	3.5	253.467	43
2.34	3.5	261.733	39
2.21	3.5	265.867	49
2.33	3.5	288.933	76
2.3	3.5	291.933	22
2.28	3.5	348.167	76
2.48	3.5	353.9	7
2.22	3.5	422.9	35
2.37	3.5	442.933	73
2.3	3.5	443.267	83
2.37	3.5	464.033	28
2.32	3.53333	4.43333	47
2.41	3.53333	69.4333	6
2.38	3.53333	88.6667	68
2.33	3.53333	92.1667	67
2.3	3.53333	102.7	36
2.47	3.53333	104.633	4
2.38	3.53333	110.8	61
2.26	3.53333	114.9	76
2.29	3.53333	146.267	64
2.43	3.53333	232.2	25
2.45	3.53333	263	58
2.42	3.53333	268.833	18
2.15	3.53333	284.633	64
2.37	3.53333	327.4	16
2.1	3.53333	369.1	28
2.33	3.53333	381.533	67
2.35	3.53333	384.367	33
2.23	3.53333	414.433	50
2.32	3.53333	446.933	16
2.23	3.53333	454.433	45
2.17	3.53333	466.9	78
2.4	3.56667	26.3	75
2.41	3.56667	42.1667	73
2.34	3.56667	50.7333	52
2.4	3.56667	52.8	30
2.4	3.56667	56.9333	23
2.34	3.56667	89.3333	49
2.31	3.56667	95.7667	53
2.47	3.56667	96.7667	53
2.19	3.56667	118.4	77
2.38	3.56667	120.833	81
2.3	3.56667	145	47
2.23	3.56667	202.967	65
2.16	3.56667	202.967	65
2.18	3.56667	204.2	78
2.44	3.56667	248.833	73
2.43	3.56667	262.933	72
2.31	3.56667	280.133	42
2.43	3.56667	304.267	58
2.47	3.56667	378.4	52
2.37	3.56667	403.433	11
2.06	3.56667	433.4	45
2.48	3.56667	459.833	61
2.42	3.6	16.6333	14
2.41	3.6	26.2	21
2.07	3.6	58.1667	45
2.25	3.6	72.8667	49
2.21	3.6	91.9333	49
2.53	3.6	147.9	80
2.5	3.6	236.533	72
2.47	3.6	247.533	5
2.38	3.6	285.2	80
2.11	3.6	432.467	27
2.45	3.63333	7	66
2.16	3.63333	41.0667	59
2.45	3.63333	80.4333	17
2.35	3.63333	91.0333	51
2.37	3.63333	172.233	22
2.26	3.63333	198.133	74
2.34	3.63333	201.167	65
2.58	3.63333	238.1	49
2.18	3.63333	248.833	53
2.19	3.63333	252.367	42
2.26	3.63333	399	39
2.22	3.63333	443.433	68
2.28	3.63333	470.767	85
2.11	3.66667	34.5	73
2.26	3.66667	57.8333	47
2.3	3.66667	220	6
2.35	3.66667	248.5	63
2.34	3.66667	258.333	71
2.28	3.66667	268.833	11
2.2	3.66667	273.7	59
2.35	3.66667	276.533	17
2.31	3.66667	302.7	6
2.16	3.66667	306.8	53
2.3	3.66667	326.633	53
2.14	3.66667	339.767	67
2.34	3.66667	345.633	67
2.59	3.66667	352.833	78
2.45	3.66667	364.533	56
2.37	3.66667	403.5	51
2.35	3.7	11.5	64
2.22	3.7	37.5667	70
2.35	3.7	50.1667	42
2.23	3.7	50.3	52
2.38	3.7	52.6333	77
2.29	3.7	52.9667	49
2.16	3.7	74.0333	57
2.31	3.7	76.9	55
2.42	3.7	86.3	81
2.3	3.7	93.0667	48
2.41	3.7	97.9667	76
2.02	3.7	114.3	70
2.29	3.7	118.433	54
2.43	3.7	132.367	76
2.31	3.7	152.333	50
2.45	3.7	159.6	67
2.2	3.7	212.167	57
2.43	3.7	253.8	36
2.35	3.7	266.833	43
2.27	3.7	323.4	77
2.36	3.7	345	72
2.36	3.7	356.3	72
1.99	3.7	365.9	27
2.29	3.7	390.767	34
2.33	3.7	417.933	48
2.35	3.7	439.267	47
2.25	3.7	451.067	86
2.38	3.7	461.9	17
2.43	3.73333	4.6	45
2.34	3.73333	4.63333	68
2.48	3.73333	5.83333	60
2.28	3.73333	28.8	77
2.19	3.73333	43.5	40
2.5	3.73333	68.9	14
2.38	3.73333	92.1667	44
2.54	3.73333	114.267	50
2.33	3.73333	119.4	41
2.09	3.73333	140.767	66
2.46	3.73333	165.4	72
2.4	3.73333	184.767	85
2.22	3.73333	200.767	40
2.23	3.73333	209.367	88
2.46	3.73333	218.5	67
2.4	3.73333	259.933	83
2.45	3.73333	299.533	59
2.3	3.73333	308.7	19
2.31	3.73333	371.033	57
2.24	3.73333	394.3	9
2.31	3.73333	421.333	22
2.25	3.73333	422.967	11
2.25	3.76667	86.2667	22
2.37	3.76667	88.9333	67
2.33	3.76667	90.5333	23
2.29	3.76667	92.4333	42
2.18	3.76667	94.2333	75
2.57	3.76667	141.633	70
2.21	3.76667	151.133	74
2.17	3.76667	214.4	23
2.27	3.76667	260.033	45
1.91	3.76667	266.033	26
2.38	3.76667	274.967	28
2.2	3.76667	328.167	26
2.4	3.76667	426.267	31
2.5	3.76667	428.833	78
2.13	3.76667	447.167	68
1.97	3.76667	453.3	39
2.34	3.8	40.3	58
2.4	3.8	43.7333	42
2.31	3.8	50.8333	51
2.34	3.8	97.1333	35
2.8	3.8	106.267	73
2.44	3.8	118.267	12
2.36	3.8	145.667	29
2.18	3.8	150.4	78
2.26	3.8	217.4	81
2.38	3.8	225.5	61
2.27	3.8	242.8	79
2.33	3.8	243.1	60
2.38	3.8	249.033	5
2.64	3.8	252.633	68
2.43	3.8	280.233	48
2.11	3.8	301.367	31
2.26	3.8	317.433	29
2.5	3.8	327.033	69
2.25	3.8	342.033	58
2.23	3.8	396.2	45
2.28	3.83333	39.5	50
2.23	3.83333	39.6667	67
2.39	3.83333	48.6333	46
2.4	3.83333	48.6333	46
2.37	3.83333	61.7	53
2.23	3.83333	70.7667	70
2.17	3.83333	76.0667	28
2.25	3.83333	101.5	77
2.17	3.83333	126.9	18
2.4	3.83333	193.833	10
2.19	3.83333	211.367	74
2.41	3.83333	223.4	73
2.26	3.83333	226.267	44
2.38	3.83333	398.633	42
2.1	3.83333	409.767	68
2.24	3.83333	431.033	15
2.25	3.86667	53.2667	83
2.3	3.86667	72.0333	77
2.36	3.86667	94.8333	65
2.37	3.86667	147.667	77
2.33	3.86667	177.2	51
2.49	3.86667	195.367	63
2.35	3.86667	210.7	64
2.24	3.86667	238.133	60
2.31	3.86667	240	89
2.26	3.86667	247.233	84
2.43	3.86667	257.633	86
2.28	3.86667	265.867	67
2.37	3.86667	316.833	72
2.31	3.86667	325.033	45
2.3	3.86667	325.133	73
2.53	3.86667	374.7	75
2.15	3.86667	413.6	65
2.13	3.86667	472.167	45
2.34	3.9	8.66667	73
2.23	3.9	72.0333	43
2.33	3.9	80.1667	65
2.26	3.9	92.7333	59
2.21	3.9	102.367	48
2.42	3.9	103.5	67
2.31	3.9	130.967	61
2.29	3.9	171.2	78
2.29	3.9	188.167	42
2.4	3.9	196.667	79
2.26	3.9	242.667	60
2.36	3.9	247.733	55
2.49	3.9	249.5	83
2.46	3.9	298.2	5
2.31	3.9	475.1	34
2.14	3.93333	65.0667	49
2.14	3.93333	70.9	58
2.15	3.93333	88.4667	41
2.28	3.93333	98.5333	68
2.48	3.93333	108.933	73
2.43	3.93333	116.4	77
2.38	3.93333	197.433	42
2.53	3.93333	202.933	77
2.2	3.93333	220.167	47
2.15	3.93333	221.733	67
2.37	3.93333	236.033	30
2.29	3.93333	236.1	56
2.12	3.93333	265.867	82
2.63	3.93333	330.433	88
2.32	3.93333	397.833	67
2.44	3.93333	417.767	33
2.29	3.93333	448.1	4
2.24	3.96667	48.1333	36
2.19	3.96667	59.4	62
2.08	3.96667	75.6667	45
2.07	3.96667	91.8	35
2.26	3.96667	110.567	67
2.43	3.96667	188.367	3
2.23	3.96667	221.333	45
2.38	3.96667	269.733	17
2.45	3.96667	391.267	23
2.2	3.96667	462.267	8
2.35	4	59.7667	55
2.38	4	84.3667	74
2.42	4	92.5333	65
2.35	4	94.5333	42
2.11	4	113.733	69
2.29	4	115.9	23
2.41	4	189.667	67
2.65	4	195.2	3
2.48	4	254.333	74
2.21	4	264.233	51
2.3	4	266.767	80
2.42	4	280	84
2.33	4	324.433	26
2.3	4	384.233	54
2.4	4	389.733	40
2.25	4	393.567	71
2.3	4	395.267	64
2.36	4	426.6	76
2.43	4	461.367	5
2.31	4.03333	5.6	27
2.51	4.03333	10.4333	10
2.24	4.03333	14.3	86
2.37	4.03333	15.9	80
2.25	4.03333	20	18
2.31	4.03333	74.4333	78
2.54	4.03333	81.3333	58
2.21	4.03333	83.2333	77
2.38	4.03333	108.067	67
2.33	4.03333	110.167	78
2.36	4.03333	113.4	79
2.14	4.03333	123.367	57
2.42	4.03333	143.4	60
2.37	4.03333	147.7	89
2.3	4.03333	159.633	61
2.36	4.03333	175.367	45
2.43	4.03333	176.6	35
2.19	4.03333	183.033	73
2.33	4.03333	187.2	67
2.24	4.03333	197.833	4
2.4	4.03333	233.867	81
2.63	4.03333	235.933	89
2.1	4.03333	244.8	78
2.38	4.03333	257.867	74
2.64	4.03333	277.6	73
2.22	4.03333	278.267	40
2.33	4.03333	316.7	59
2.32	4.03333	324.233	83
2.29	4.03333	394.967	62
2.19	4.03333	416.2	13
2.38	4.03333	454.233	3
2.42	4.03333	454.3	66
2.18	4.03333	456.5	71
2.27	4.06667	37.6667	62
2.25	4.06667	51.5667	53
2.1	4.06667	79.4667	49
2.46	4.06667	90.4333	64
2.25	4.06667	121.633	52
2.5	4.06667	144.8	80
2.46	4.06667	199.333	70
2.28	4.06667	231	57
2.3	4.06667	254.133	69
2.38	4.06667	274.4	77
2.27	4.06667	280.067	17
2.42	4.06667	280.2	41
2.28	4.06667	307.867	25
2.39	4.06667	317.5	17
2.41	4.06667	331.3	56
2.2	4.06667	447.633	52
2.41	4.1	5.56667	28
2.37	4.1	8.4	48
2.39	4.1	26.1667	31
2.31	4.1	33.1333	40
2.28	4.1	53.8	67
2.24	4.1	71.1333	41
2.45	4.1	106.2	63
2.38	4.1	109.767	11
2.43	4.1	113.833	66
2.42	4.1	117.4	54
2.32	4.1	119.5	72
2.46	4.1	137.9	3
2.32	4.1	187.033	60
2.19	4.1	209.4	46
2.67	4.1	217.567	66
2.34	4.1	252.7	42
2.4	4.1	308.967	20
2.39	4.1	329.967	28
2.33	4.1	386.533	66
2.42	4.1	387.867	24
2.16	4.1	421.7	27
2.36	4.1	427.5	53
2.56	4.1	455.667	55
2.26	4.13333	6.83333	14
2.69	4.13333	40.5333	63
2.28	4.13333	65.5333	60
2.57	4.13333	72.4	56
2.35	4.13333	84.7667	60
2.42	4.13333	139.067	70
2.34	4.13333	152.6	63
2.23	4.13333	166.467	34
2.19	4.13333	214.4	40
2.37	4.13333	236.2	63
2.4	4.13333	240.1	24
2.31	4.13333	279.7	29
2.3	4.13333	301.133	34
2.3	4.13333	366.467	69
2.16	4.13333	453.833	29
2.25	4.16667	6.23333	42
2.31	4.16667	44.4	36
2.37	4.16667	45.5333	68
2.25	4.16667	49.3	26
2.35	4.16667	54.8333	76
2.19	4.16667	65.0667	41
2.33	4.16667	84.3333	42
2.26	4.16667	94.8333	34
2.38	4.16667	96.0333	35
2.41	4.16667	148.933	42
2.28	4.16667	155.133	29
2.46	4.16667	174.633	69
2.38	4.16667	207.333	70
2.33	4.16667	212	22
2.33	4.16667	243.433	4
2.32	4.16667	271.3	91
2.2	4.16667	357.7	78
2.33	4.16667	433.9	28
2.21	4.2	5.93333	77
2.4	4.2	7.26667	66
2.32	4.2	10.0667	25
2.29	4.2	69.5	11
2.19	4.2	73.1667	57
2.21	4.2	74.5667	51
2.4	4.2	84.4333	19
2.44	4.2	106.933	69
2.32	4.2	116.2	88
2.35	4.2	117.333	62
2.4	4.2	123.2	12
2.49	4.2	210.033	2
2.17	4.2	210.6	81
2.22	4.2	227.3	81
2.41	4.2	294.5	20
2.46	4.2	304.867	34
2.5	4.2	339.967	22
2.33	4.2	416	55
2.27	4.2	460.867	91
2.3	4.23333	24.2333	55
2.42	4.23333	36.4667	60
2.19	4.23333	71.8333	42
2.23	4.23333	77.3333	79
2.55	4.23333	87.9667	49
2.26	4.23333	108.1	18
2.1	4.23333	122.067	63
2.06	4.23333	145.733	64
2.08	4.23333	146.333	79
2.43	4.23333	173.567	14
2.34	4.23333	198.9	86
2.22	4.23333	233.567	49
2.23	4.23333	269.3	13
2.13	4.23333	295.133	36
2.41	4.23333	315.233	84
2.15	4.23333	348.6	45
2.2	4.23333	380.067	82
2.47	4.23333	407.867	81
2.45	4.23333	428.467	25
2.42	4.23333	428.467	25
2.28	4.26667	48.6333	50
2.38	4.26667	48.9333	19
2.35	4.26667	69.2333	64
2.5	4.26667	73.1333	57
2.12	4.26667	79.5333	41
2.29	4.26667	83.8667	51
2.32	4.26667	84.0333	76
2.49	4.26667	86	69
2.28	4.26667	101.633	51
2.4	4.26667	109.2	84
2.37	4.26667	150.967	70
2.28	4.26667	238.267	69
2.3	4.26667	268.133	24
2.36	4.26667	312.433	72
2.27	4.26667	327.5	9
2.4	4.26667	328.333	70
2.37	4.26667	429.433	19
2.2	4.26667	478.7	53
2.42	4.3	14.0667	56
2.26	4.3	42.4667	40
2.31	4.3	44.4333	80
2.44	4.3	104.233	66
2.1	4.3	114.567	52
2.42	4.3	132.2	44
2.32	4.3	135.6	83
2.25	4.3	175.2	43
2.38	4.3	187.767	40
2.35	4.3	193.833	48
2.23	4.3	213.3	85
2.33	4.3	231.3	72
2.3	4.3	238.233	53
2.49	4.3	248.1	77
2.21	4.3	260.167	40
2.42	4.3	261.3	37
2.39	4.3	262.667	20
2.25	4.3	287.267	73
2.31	4.3	293.433	69
2.29	4.3	440.6	66
2.33	4.33333	5.43333	51
2.64	4.33333	5.7	16
2.4	4.33333	5.83333	68
2.24	4.33333	24.9	65
2.39	4.33333	43.9333	67
2.24	4.33333	61	73
2.36	4.33333	107.7	10
2.21	4.33333	115.733	56
2.38	4.33333	125.133	40
2.42	4.33333	139.8	57
2.44	4.33333	147.7	87
2.46	4.33333	149.567	54
2.55	4.33333	174.8	2
2.27	4.33333	191.1	39
2.24	4.33333	200.633	40
2.35	4.33333	214.367	80
2.51	4.33333	218.333	77
2.44	4.33333	220.767	83
2.32	4.33333	257.533	78
2.23	4.33333	266.433	53
2.22	4.33333	270.2	60
2.32	4.33333	275.5	50
2.33	4.33333	283.9	43
2.32	4.33333	417.1	13
2.46	4.33333	446.833	11
2.32	4.33333	478.3	46
2.35	4.36667	27.9	55
2.39	4.36667	37.5667	9
2.17	4.36667	40.1333	50
2.31	4.36667	69.5667	73
2.32	4.36667	72.7667	78
2.28	4.36667	88.5667	55
2.35	4.36667	94.4	21
2.33	4.36667	106.4	66
2.35	4.36667	127.733	63
2.11	4.36667	144.833	41
2.36	4.36667	219.533	81
2.41	4.36667	253.267	72
2.08	4.36667	355.4	73
2.1	4.36667	366.467	63
2.36	4.4	29.8333	42
2.34	4.4	38.7333	43
2.3	4.4	66.5	50
2.18	4.4	80.1667	66
2.54	4.4	80.7333	69
2.29	4.4	88.5	82
2.21	4.4	103.067	25
2.29	4.4	112.367	19
2.37	4.4	136.8	64
2.36	4.4	142.833	54
2.45	4.4	197.9	80
2.4	4.4	223.933	79
2.36	4.4	236.667	9
2.16	4.4	258.7	74
2.42	4.4	262.867	83
2.47	4.4	283.733	47
2.23	4.4	313.8	64
2.34	4.4	316.733	91
2.45	4.4	319.567	64
2.3	4.4	346.533	85
2.45	4.4	415.7	6
2.54	4.4	418.9	23
2.28	4.4	433.333	18
2.19	4.43333	46.2	51
2.24	4.43333	65.3	68
2.16	4.43333	71.7333	48
2.42	4.43333	89.1	57
2.18	4.43333	99.2	91
2.28	4.43333	106.267	70
2.38	4.43333	138.667	90
2.21	4.43333	154.333	66
2.35	4.43333	158.733	40
2.43	4.43333	188.767	14
2.3	4.43333	207.8	63
2.29	4.43333	254.833	79
2.25	4.43333	280.067	44
2.16	4.43333	292	42
2.09	4.43333	297.4	17
2.4	4.43333	301.9	21
2.21	4.43333	326.2	36
2.35	4.43333	343.367	3
2.26	4.43333	346.567	10
2.42	4.43333	355.933	41
2.4	4.43333	359.4	3
2.13	4.43333	423.9	32
2.29	4.43333	425.3	48
2.33	4.43333	463.533	9
2.39	4.46667	6.23333	62
2.7	4.46667	22.6667	87
2.43	4.46667	63.2333	43
2.4	4.46667	75.9667	53
1.96	4.46667	91.8667	26
2.24	4.46667	144.5	66
2.35	4.46667	158.967	75
2.15	4.46667	166.733	59
2.39	4.46667	224	24
2.36	4.46667	228.8	69
2.35	4.46667	281.333	66
2.37	4.46667	287.1	61
2.36	4.46667	296.8	73
2.43	4.46667	298.767	19
2.25	4.46667	324.867	67
2.35	4.46667	367.967	13
2.27	4.46667	404.467	48
2.32	4.46667	415	19
2.37	4.46667	435.3	44
2.3	4.5	6.36667	48
2.49	4.5	14.4667	52
2.15	4.5	60.1	37
2.35	4.5	77.6667	53
2.37	4.5	140.467	70
2.44	4.5	149.933	65
2.19	4.5	173.667	21
2.34	4.5	191.6	37
2.3	4.5	220.5	55
2.31	4.5	225.567	29
2.43	4.5	254.733	79
2.53	4.5	269.567	65
2.33	4.5	285.767	76
2.25	4.53333	5	51
2.31	4.53333	8.56667	53
2.3	4.53333	74.7333	43
2.53	4.53333	102	75
2.36	4.53333	122.8	19
2.38	4.53333	205.367	80
2.39	4.53333	224.433	77
2.3	4.53333	260.467	55
2.29	4.53333	267.667	31
2.21	4.53333	279.4	32
2.44	4.53333	305.5	3
2.42	4.53333	341.767	73
2.15	4.53333	350.767	40
2.36	4.53333	394.3	45
2.45	4.53333	400.867	54
2.34	4.53333	424.1	28
2.54	4.53333	453.9	5
2.42	4.53333	466.467	19
2.34	4.56667	5.76667	59
2.27	4.56667	18.0333	34
2.35	4.56667	37.5667	34
2.34	4.56667	53.8	55
2.12	4.56667	62.2667	41
2.27	4.56667	70.8667	65
2.55	4.56667	76.8333	79
2.2	4.56667	83.7333	49
2.28	4.56667	89.3333	42
2.19	4.56667	185.633	72
2.48	4.56667	202.667	77
2.37	4.56667	226.633	48
2.29	4.56667	240.733	60
2.3	4.56667	248.967	15
2.58	4.56667	261.667	67
2.27	4.56667	314.033	72
2.32	4.56667	333.767	69
2.27	4.56667	468.7	91
2.37	4.6	5.06667	49
2.42	4.6	50.0333	56
2.4	4.6	67.8	60
2.25	4.6	72.4667	49
2.39	4.6	86.7333	39
2.22	4.6	96.2333	43
2.37	4.6	161.733	14
2.45	4.6	170.867	64
2.42	4.6	184.2	24
2.44	4.6	210.467	66
2.18	4.6	214.067	21
2.41	4.6	249.033	21
2.57	4.6	257.067	57
2.4	4.6	349.3	39
2.37	4.6	365.067	50
2.3	4.6	444.067	28
2.17	4.63333	7.73333	30
2.23	4.63333	40	40
2.29	4.63333	47	37
2.35	4.63333	65.2333	37
2.27	4.63333	75.4333	76
2.31	4.63333	85.2	15
2.32	4.63333	87.6333	21
2.45	4.63333	90.2333	64
2.38	4.63333	94.5333	79
2.25	4.63333	118.767	59
2.37	4.63333	163.2	55
2.49	4.63333	164.367	12
2.56	4.63333	176.367	61
2.54	4.63333	204.567	15
2.19	4.63333	237.9	81
2.08	4.63333	237.9	81
2.36	4.63333	265.533	7
2.39	4.63333	287.167	67
2.4	4.63333	314.7	54
2.34	4.63333	321.233	60
2.27	4.63333	383.6	29
2.3	4.63333	460.767	71
2.22	4.66667	5.43333	35
2.47	4.66667	7.8	60
2.47	4.66667	67.0333	73
2.25	4.66667	70.1667	41
2.04	4.66667	93.2667	67
2.25	4.66667	113.233	44
2.28	4.66667	121.133	71
2.5	4.66667	165.933	71
2.41	4.66667	207.4	63
2.76	4.66667	228.367	52
2.27	4.66667	253.833	87
2.38	4.66667	263.267	69
2.31	4.66667	264.167	52
2.48	4.66667	286.367	62
2.34	4.66667	301	61
2.34	4.66667	306.633	15
2.27	4.66667	310.2	41
2.22	4.66667	331.033	68
2.31	4.66667	392.667	40
2.62	4.7	94.9	79
2.44	4.7	107.533	59
2.39	4.7	145.7	78
2.54	4.7	177.833	80
2.61	4.7	191.967	73
2.28	4.7	205.033	62
2.37	4.7	245.933	17
2.36	4.7	254.467	86
2.01	4.7	255.933	53
2.31	4.7	289.667	33
2.43	4.7	334.7	83
2.32	4.7	354.167	60
2.3	4.7	407.567	65
2.29	4.73333	2.06667	51
2.2	4.73333	50.6333	45
2.38	4.73333	62.6	14
2.29	4.73333	65.5667	48
2.2	4.73333	75.1667	65
2.38	4.73333	79.7	66
2.16	4.73333	91.2667	53
1.95	4.73333	119.6	35
2.3	4.73333	143.7	41
2.24	4.73333	155.833	52
2.47	4.73333	226.1	24
2.31	4.73333	237.933	91
2.4	4.73333	260.7	80
2.24	4.73333	284.067	13
2.34	4.73333	392.267	17
2.29	4.73333	425.6	33
2.05	4.76667	4.83333	58
2.27	4.76667	46.3667	69
2.37	4.76667	54	60
2.6	4.76667	65.6333	75
2.42	4.76667	82	24
2.29	4.76667	102.367	52
2.36	4.76667	105.4	72
2.23	4.76667	106.467	59
2.41	4.76667	158.033	29
2.33	4.76667	189.633	56
2.25	4.76667	239.3	46
2.32	4.76667	254.6	7
2.36	4.76667	265.533	78
1.77	4.76667	275.2	64
2.39	4.8	6.2	83
2.39	4.8	66.8667	25
2.36	4.8	72.3667	79
2.33	4.8	77.4	77
2.45	4.8	85.7667	9
2.49	4.8	88.1	12
2.19	4.8	93.1333	51
2.32	4.8	106.467	21
2.49	4.8	119.967	62
2.38	4.8	194.233	55
2.45	4.8	201.667	13
2.39	4.8	237.933	81
2.45	4.8	265.333	12
2.28	4.8	304.2	8
2.2	4.8	319.8	20
2.41	4.8	329.5	68
2.39	4.8	410.367	19
2.29	4.8	444	18
2.34	4.83333	52.1667	61
2.32	4.83333	55.2667	50
2.28	4.83333	68.6667	55
2.45	4.83333	75.3	19
2.23	4.83333	77	58
2.53	4.83333	95.3667	76
2.36	4.83333	97.8333	71
2.28	4.83333	137.233	23
2.24	4.83333	142.267	71
2.25	4.83333	177	65
2.33	4.83333	190.833	34
2.32	4.83333	352.633	42
2.36	4.83333	352.633	42
2.3	4.83333	356	76
2.24	4.83333	362.2	43
2.17	4.83333	367	59
2.73	4.83333	405.167	1
2.22	4.86667	34.7667	42
2.35	4.86667	59.1	78
2.12	4.86667	79.1667	73
2.31	4.86667	80.7	80
2.26	4.86667	83.5667	20
2.21	4.86667	101.8	37
2.14	4.86667	148.333	85
2.39	4.86667	176.633	80
2.13	4.86667	203.667	47
2.61	4.86667	210.667	52
2.39	4.86667	272.5	3
2.19	4.86667	289.9	66
2.24	4.86667	298.267	46
2.39	4.86667	298.633	31
2.21	4.86667	339.033	39
2.19	4.86667	356.6	31
2.39	4.86667	418.533	73
2.53	4.86667	430.533	9
2.34	4.9	4.03333	48
2.34	4.9	4.43333	77
2.52	4.9	51.3333	20
2.34	4.9	68.9333	53
2.27	4.9	80.3333	56
2.31	4.9	100.833	72
2.05	4.9	115.2	67
2.11	4.9	115.2	67
2.24	4.9	129.667	49
2.29	4.9	133.9	89
2.3	4.9	339.867	47
2.21	4.9	400.633	15
2.33	4.9	406.1	49
2.23	4.9	406.9	15
2.27	4.9	433.7	35
2.54	4.93333	6.6	25
2.34	4.93333	8.43333	73
2.29	4.93333	42.4	28
2.26	4.93333	54	14
2.21	4.93333	67.9667	49
2.36	4.93333	70.3333	72
2.29	4.93333	86.2667	78
2.32	4.93333	107.433	89
2.33	4.93333	149.667	61
2.5	4.93333	155.767	71
2.12	4.93333	179.833	51
2.12	4.93333	184.367	52
2.36	4.93333	186	86
2.3	4.93333	250.267	78
2.3	4.93333	266.767	67
2.38	4.93333	369.533	55
2.5	4.93333	387.633	76
2.03	4.96667	5.43333	66
2.4	4.96667	38.8	10
2.3	4.96667	49.4333	40
2.35	4.96667	59.3667	38
2.17	4.96667	68.3667	39
2.24	4.96667	85.7	63
2.23	4.96667	129.567	76
2.27	4.96667	151.3	88
2.33	4.96667	167.933	34
2.38	4.96667	196.9	38
2.25	4.96667	218.333	79
2.27	4.96667	221.233	64
2.3	4.96667	221.233	64
2.31	4.96667	235.133	52
2.04	4.96667	238.267	64
2.17	4.96667	247.033	55
2.33	4.96667	251.333	14
2.41	4.96667	264.633	68
2.48	4.96667	282.933	49
2.29	4.96667	336.433	18
2.39	4.96667	350.833	18
2.43	4.96667	459.867	22
2.26	5	5.3	75
2.34	5	6.7	77
2.38	5	23.3333	86
2.26	5	26.1333	51
2.25	5	37.9333	47
2.28	5	37.9333	47
2.25	5	40.6333	61
2.43	5	46.3667	62
2.27	5	49.7333	72
2.26	5	74.8667	66
2.36	5	100.133	57
2.4	5	108.267	62
2.48	5	113.3	72
2.28	5	129.833	85
[truncated: 11,590 more rows]

## Sheet: Sodium
Sodium
Result (mmol/L)	Rest time (min)	Minutes after 7am	Age
142	0.0666667	199.1	87
136	0.0666667	418.833	8
140	0.1	199.6	79
143	0.1	293.8	49
140	0.1	360.033	3
141	0.1	433	20
144	0.133333	180.1	83
141	0.133333	224.033	83
140	0.166667	164.4	47
139	0.166667	189.3	42
140	0.166667	356.467	9
137	0.2	160.633	62
137	0.2	160.633	62
142	0.2	328	76
140	0.2	343.067	69
140	0.2	359.967	73
138	0.2	404.2	55
129	0.233333	118.4	74
144	0.233333	204.367	76
140	0.233333	228.167	82
143	0.233333	234.3	79
140	0.233333	310	71
128	0.233333	331.2	66
127	0.233333	331.2	66
141	0.233333	375.467	52
146	0.233333	407.067	69
143	0.266667	169.933	79
143	0.266667	178.733	71
140	0.266667	198.367	64
144	0.266667	211.1	88
133	0.266667	226.4	77
142	0.266667	248	64
142	0.266667	397.067	14
129	0.3	107.5	64
137	0.3	129.467	48
139	0.3	210	8
145	0.3	255.433	43
142	0.3	322.367	65
139	0.3	322.567	54
133	0.3	328.833	78
144	0.3	394.167	77
140	0.3	429.067	50
140	0.3	443.433	68
139	0.333333	102.733	64
143	0.333333	142.8	74
137	0.333333	247.5	66
143	0.333333	249.3	9
142	0.333333	249.4	34
134	0.333333	257.467	90
141	0.333333	266.967	81
139	0.333333	334.1	78
141	0.333333	390.033	16
143	0.366667	13.4333	67
139	0.366667	44.7	40
141	0.366667	51.7667	49
140	0.366667	175.933	58
138	0.366667	215.567	64
141	0.366667	432.433	18
139	0.4	4.56667	41
141	0.4	90.7333	83
143	0.4	148.5	66
145	0.4	156.1	83
142	0.4	175.8	66
142	0.4	193.767	70
134	0.4	321.833	67
141	0.4	355.533	35
140	0.4	385.967	64
144	0.433333	86.2	63
140	0.433333	126.367	68
132	0.433333	144.167	70
137	0.433333	170.5	68
142	0.433333	213.167	61
138	0.433333	282.867	67
140	0.433333	282.967	66
139	0.433333	306.633	99
135	0.433333	324.167	75
142	0.433333	331.367	97
137	0.466667	1.5	70
138	0.466667	61.9333	27
139	0.466667	91.3667	69
140	0.466667	122.2	66
130	0.466667	132.167	74
140	0.466667	190.733	81
140	0.466667	309.6	13
136	0.466667	463.333	28
142	0.5	26.1667	63
143	0.5	93.1667	89
141	0.5	133.967	80
141	0.5	331.7	68
140	0.5	336.367	71
141	0.5	352.667	82
142	0.5	379.7	21
144	0.5	402.733	65
142	0.5	468.8	84
143	0.533333	13.5667	73
142	0.533333	52.5333	75
139	0.533333	92	69
138	0.533333	114.067	79
140	0.533333	121.1	63
138	0.533333	162.633	71
142	0.533333	180.467	17
140	0.533333	187.233	77
141	0.533333	210.5	35
141	0.533333	307.233	80
136	0.533333	323.567	96
141	0.533333	326.267	48
137	0.533333	378.1	35
145	0.533333	380.3	71
143	0.533333	391.9	59
140	0.533333	397.667	17
137	0.533333	433.467	18
142	0.566667	17.5333	62
137	0.566667	29.5333	69
139	0.566667	43.1	68
142	0.566667	143.1	59
141	0.566667	149.467	48
141	0.566667	175.567	83
144	0.566667	179.9	75
141	0.566667	180.4	75
144	0.566667	212.267	76
141	0.566667	213.167	72
141	0.566667	245.1	63
142	0.566667	291.8	67
136	0.566667	308.767	71
146	0.566667	314.167	75
140	0.566667	332.567	59
136	0.566667	358.067	73
138	0.566667	386.6	49
140	0.566667	395.4	80
122	0.566667	434.667	72
141	0.6	4.73333	61
142	0.6	7.9	64
139	0.6	25.8	48
138	0.6	53.5	75
141	0.6	59.9333	16
140	0.6	77.0333	52
141	0.6	100.967	54
141	0.6	100.967	54
141	0.6	102.467	89
140	0.6	132.733	32
142	0.6	190.167	76
139	0.6	246.4	85
139	0.6	246.6	57
140	0.6	322.233	94
139	0.6	326.2	79
139	0.6	329.867	52
136	0.6	352.7	64
135	0.6	352.7	64
138	0.6	352.733	39
140	0.6	362.7	9
140	0.6	400.067	30
136	0.6	436.167	70
143	0.6	439.633	18
142	0.6	441.167	14
141	0.633333	14.5667	78
142	0.633333	27.4333	54
143	0.633333	110.367	70
136	0.633333	120.867	58
140	0.633333	130.2	81
140	0.633333	149.333	18
132	0.633333	165.2	50
140	0.633333	171.8	77
140	0.633333	262.2	27
136	0.633333	281.333	67
141	0.633333	286.067	92
136	0.633333	365.967	94
145	0.633333	377.967	52
140	0.633333	404.9	61
141	0.633333	408.167	66
144	0.633333	418.967	39
142	0.633333	419.033	37
138	0.633333	434.933	73
141	0.633333	445.567	37
142	0.633333	458.1	53
142	0.633333	459	50
143	0.666667	43.6667	77
143	0.666667	71.0333	88
138	0.666667	82.1333	82
143	0.666667	104.467	58
137	0.666667	110.067	19
146	0.666667	126.767	74
145	0.666667	172.2	69
139	0.666667	195.8	82
138	0.666667	271.867	60
137	0.666667	279.267	77
139	0.666667	300.733	68
142	0.666667	330.933	56
140	0.666667	330.933	56
141	0.666667	375.7	79
140	0.666667	453.433	33
140	0.7	0.8	63
142	0.7	27.2667	63
142	0.7	67.2667	35
141	0.7	72.4	68
145	0.7	79.9333	66
142	0.7	84.8667	32
140	0.7	89.1	74
141	0.7	125.3	58
141	0.7	135	73
143	0.7	166.267	67
144	0.7	188.4	90
142	0.7	254	77
143	0.7	263.8	61
142	0.7	272	82
139	0.7	291.467	79
139	0.7	332.067	60
138	0.7	343.6	20
139	0.7	348.267	40
139	0.7	413.267	65
140	0.7	435.2	59
138	0.7	455.267	25
143	0.7	463.433	69
140	0.733333	2.43333	49
142	0.733333	60.3667	59
142	0.733333	78.9333	67
142	0.733333	117.9	56
140	0.733333	143.667	63
143	0.733333	191.767	76
138	0.733333	217.833	78
138	0.733333	240.733	74
142	0.733333	242.2	63
141	0.733333	245.933	20
139	0.733333	281.667	62
139	0.733333	315.933	59
136	0.733333	328.033	64
141	0.733333	329.433	43
142	0.733333	350.333	13
137	0.733333	386.9	59
141	0.733333	418.833	22
140	0.733333	437.733	56
145	0.766667	0.5	60
141	0.766667	54.3667	50
142	0.766667	60.5333	71
144	0.766667	73.0667	17
139	0.766667	93.1333	54
142	0.766667	136.133	68
131	0.766667	143.167	75
140	0.766667	157.667	48
135	0.766667	162.233	74
142	0.766667	167.8	79
141	0.766667	198.733	61
140	0.766667	217.533	29
138	0.766667	224.3	72
139	0.766667	229.733	49
141	0.766667	250.8	21
148	0.766667	270.567	84
142	0.766667	304.7	51
144	0.766667	306.8	86
140	0.766667	316.767	47
139	0.766667	337.133	42
141	0.766667	347.4	78
142	0.766667	376.067	23
140	0.766667	394.733	74
140	0.766667	396.667	8
140	0.766667	403.033	4
135	0.766667	448.833	19
141	0.766667	462.767	42
139	0.8	0.3	61
140	0.8	40.3	23
136	0.8	47.5667	56
143	0.8	48	49
143	0.8	50.8667	28
139	0.8	59.2	83
140	0.8	61.3667	45
145	0.8	77.8333	23
138	0.8	117.833	60
143	0.8	135.4	31
143	0.8	138.367	47
142	0.8	149.767	59
140	0.8	149.767	59
131	0.8	176	67
137	0.8	186.833	48
141	0.8	200	11
140	0.8	211.967	73
135	0.8	222.967	64
143	0.8	223.4	69
145	0.8	223.733	75
139	0.8	230.133	76
144	0.8	303.933	39
138	0.8	321.9	73
140	0.8	336.567	70
138	0.8	350.333	85
140	0.8	354.6	46
140	0.8	362.5	29
140	0.8	431.967	67
139	0.8	450.2	9
141	0.833333	1	82
140	0.833333	2.2	69
142	0.833333	10.1667	72
143	0.833333	17.0667	60
140	0.833333	37.7333	58
144	0.833333	52.8667	70
140	0.833333	68.5	43
142	0.833333	74.5	30
139	0.833333	75.3667	26
142	0.833333	80.8667	29
138	0.833333	92.4667	50
137	0.833333	116.133	73
136	0.833333	122.5	49
143	0.833333	144.9	84
143	0.833333	157.967	58
142	0.833333	180.633	66
143	0.833333	186.333	89
129	0.833333	196.967	61
143	0.833333	204.767	72
138	0.833333	243.067	72
141	0.833333	263	84
141	0.833333	265.5	42
134	0.833333	279.667	68
133	0.833333	302.067	84
134	0.833333	302.867	65
142	0.833333	315.533	82
138	0.833333	318.4	76
143	0.833333	343.533	70
137	0.833333	346.033	85
137	0.833333	348	64
141	0.833333	377.267	61
139	0.833333	378.767	73
132	0.833333	397	14
143	0.833333	428.767	30
137	0.833333	454.733	55
139	0.833333	474.367	73
141	0.866667	2	30
140	0.866667	2.76667	61
139	0.866667	3.9	49
143	0.866667	17.7667	55
143	0.866667	31.8	85
141	0.866667	38.6	51
142	0.866667	49.3	56
142	0.866667	53.9	73
142	0.866667	88.2	16
144	0.866667	92.2333	32
132	0.866667	123.2	62
138	0.866667	134.867	54
143	0.866667	144.067	76
141	0.866667	151.5	31
142	0.866667	171.167	61
137	0.866667	181.7	36
141	0.866667	189.1	59
142	0.866667	223.3	72
138	0.866667	226.667	28
140	0.866667	230.167	10
140	0.866667	231.733	49
135	0.866667	232.167	67
141	0.866667	232.667	67
142	0.866667	243.333	69
141	0.866667	267.033	61
142	0.866667	273.1	57
144	0.866667	273.3	20
140	0.866667	290	84
139	0.866667	314.133	77
134	0.866667	316.733	57
140	0.866667	326.767	79
143	0.866667	330.467	85
141	0.866667	344.9	80
140	0.866667	344.9	80
138	0.866667	406.667	82
148	0.866667	412.1	57
137	0.866667	412.533	66
141	0.866667	431.933	15
137	0.866667	438.667	17
141	0.866667	470.9	13
139	0.866667	475.367	33
138	0.9	3.93333	47
141	0.9	11.8333	71
140	0.9	23.6667	67
139	0.9	26.9333	74
144	0.9	36.4333	15
129	0.9	43.3667	57
139	0.9	48.2667	82
142	0.9	56.7333	64
140	0.9	57.7	46
138	0.9	57.9667	69
144	0.9	62.5	59
140	0.9	69.8	53
141	0.9	70.9667	70
144	0.9	86.3667	76
139	0.9	88.3	68
141	0.9	90.9	78
141	0.9	97.1667	78
141	0.9	102.533	67
139	0.9	107.4	45
142	0.9	110.967	48
140	0.9	122.3	86
135	0.9	136.867	83
142	0.9	189.2	76
138	0.9	200.133	75
139	0.9	203.867	79
137	0.9	235.133	28
144	0.9	237.033	77
143	0.9	238.967	76
138	0.9	240.033	40
144	0.9	240.367	19
140	0.9	240.6	11
141	0.9	242.533	33
139	0.9	260.167	48
142	0.9	269.533	64
134	0.9	274.933	90
139	0.9	277.967	40
146	0.9	290.267	40
141	0.9	296.767	70
136	0.9	300.167	78
140	0.9	302.7	73
141	0.9	304.1	54
143	0.9	318.467	72
142	0.9	341.967	59
146	0.9	342.867	35
137	0.9	350.067	66
142	0.9	380.833	60
145	0.9	414.067	84
136	0.9	420.533	28
139	0.9	436.1	70
142	0.9	437.133	66
136	0.9	437.8	73
141	0.9	439.833	34
141	0.9	449.5	50
142	0.9	460.033	10
142	0.9	465.433	57
141	0.933333	16.3667	35
143	0.933333	46.9333	68
139	0.933333	53.5	72
141	0.933333	67.6667	49
143	0.933333	69.6	27
140	0.933333	92.9667	73
143	0.933333	97.2667	63
141	0.933333	115.367	84
142	0.933333	122.7	60
144	0.933333	130.767	67
142	0.933333	143.833	21
136	0.933333	163.267	68
138	0.933333	169.8	64
138	0.933333	175.533	66
143	0.933333	176.9	66
140	0.933333	178.467	7
141	0.933333	186.267	67
139	0.933333	236.367	52
137	0.933333	251.7	36
147	0.933333	253.567	90
143	0.933333	298.767	84
142	0.933333	315.533	66
139	0.933333	349.4	26
140	0.933333	368.433	78
143	0.933333	377.7	70
143	0.933333	453	33
140	0.933333	465.1	48
143	0.933333	468.133	19
143	0.966667	16.6667	66
139	0.966667	26.0667	39
141	0.966667	41.4333	51
141	0.966667	52.4667	61
138	0.966667	61.7333	41
141	0.966667	62.3667	42
141	0.966667	84.7	73
140	0.966667	84.7	73
131	0.966667	84.7667	79
138	0.966667	104.1	72
143	0.966667	115.633	48
137	0.966667	140.167	26
138	0.966667	140.6	65
142	0.966667	172.167	75
142	0.966667	183.5	72
139	0.966667	187.5	72
138	0.966667	217.8	91
136	0.966667	255.167	69
136	0.966667	255.167	69
141	0.966667	262.9	79
141	0.966667	265.567	22
133	0.966667	266.033	84
142	0.966667	271.5	86
143	0.966667	272.233	42
139	0.966667	275.333	73
142	0.966667	276.1	44
138	0.966667	283	28
142	0.966667	291.167	82
143	0.966667	302.567	61
132	0.966667	307.767	79
136	0.966667	308.5	81
137	0.966667	316.833	82
144	0.966667	324.333	20
138	0.966667	327.567	75
136	0.966667	331.9	83
137	0.966667	352.6	73
137	0.966667	352.633	35
143	0.966667	353.467	61
134	0.966667	366.167	12
137	0.966667	391.7	73
142	0.966667	402.7	41
141	0.966667	418.367	54
139	0.966667	430	12
141	0.966667	436.533	51
142	0.966667	443.667	17
139	0.966667	448.033	80
136	0.966667	469.033	19
141	0.966667	472.067	53
142	1	7.5	77
141	1	13.8667	62
138	1	25.3	42
138	1	52.3667	32
136	1	53.0667	79
140	1	68.9	43
140	1	69	67
140	1	76.1667	58
142	1	77.1333	67
141	1	77.1333	67
141	1	87.8333	47
144	1	96.4	67
141	1	98	72
135	1	105.067	93
141	1	154.433	16
136	1	165.967	3
144	1	183.5	51
138	1	184	13
140	1	214.233	51
139	1	232.333	48
141	1	261.4	49
144	1	265.767	63
143	1	285	68
142	1	291	57
137	1	305.367	78
140	1	305.6	21
140	1	320.133	33
142	1	320.333	33
138	1	359.2	88
140	1	385.7	68
140	1	385.7	68
142	1	412.5	37
136	1	423.5	78
140	1	425.9	11
140	1	442.3	81
140	1	452.333	11
143	1	462.267	83
140	1.03333	1.73333	65
139	1.03333	3.8	19
141	1.03333	15.8333	64
142	1.03333	21.5667	69
141	1.03333	26.2667	48
137	1.03333	80	72
142	1.03333	162.067	34
144	1.03333	172.333	55
143	1.03333	178.4	60
141	1.03333	183.767	74
138	1.03333	195.367	48
136	1.03333	195.733	68
136	1.03333	208.1	80
143	1.03333	236.667	72
141	1.03333	240.233	21
141	1.03333	272.033	47
141	1.03333	283.267	26
139	1.03333	307.367	78
137	1.03333	325.967	54
142	1.03333	342.7	69
138	1.03333	342.8	20
139	1.03333	350.833	8
142	1.03333	379.733	68
139	1.03333	387.2	19
144	1.03333	409.967	67
143	1.03333	409.967	67
140	1.03333	423.033	52
141	1.03333	430.7	19
141	1.03333	443.567	17
143	1.03333	454.967	77
142	1.06667	1.46667	67
142	1.06667	16	68
142	1.06667	28.4667	32
140	1.06667	42.5667	61
143	1.06667	44.7667	66
137	1.06667	56.7667	69
144	1.06667	59.7667	53
140	1.06667	99.2	31
141	1.06667	113.867	60
142	1.06667	114.467	69
141	1.06667	116.067	74
138	1.06667	175.4	73
137	1.06667	175.4	73
128	1.06667	180.433	69
144	1.06667	201.433	71
134	1.06667	206.933	75
139	1.06667	217.5	50
135	1.06667	231.5	80
144	1.06667	245.6	65
143	1.06667	245.6	65
139	1.06667	258.967	22
137	1.06667	260.733	81
147	1.06667	261.2	80
140	1.06667	264.8	45
142	1.06667	271	24
143	1.06667	272.167	72
144	1.06667	284.9	66
142	1.06667	288.333	73
136	1.06667	303.3	71
140	1.06667	311.767	17
140	1.06667	319	35
140	1.06667	324.133	31
141	1.06667	324.767	75
140	1.06667	379.133	67
140	1.06667	379.133	67
141	1.06667	386.867	30
137	1.06667	394.4	43
141	1.06667	407.233	29
137	1.06667	414.967	22
138	1.06667	432.567	44
141	1.06667	437.367	62
144	1.06667	441.3	51
141	1.06667	457.867	66
139	1.06667	463.833	8
137	1.06667	471.067	6
140	1.1	3.23333	30
139	1.1	20.1333	70
140	1.1	21.3	26
141	1.1	24.3667	61
140	1.1	24.3667	61
138	1.1	30.7333	56
138	1.1	48.3333	75
144	1.1	58.9333	85
143	1.1	60.0667	44
142	1.1	63.7667	67
140	1.1	67.4	73
144	1.1	68.7333	57
142	1.1	76.4	55
139	1.1	86.2	72
137	1.1	88.1	19
134	1.1	92.1333	74
142	1.1	101.367	17
142	1.1	101.533	74
139	1.1	102.167	55
141	1.1	113.6	56
143	1.1	121.367	55
143	1.1	129.333	55
143	1.1	146.767	68
143	1.1	163	22
145	1.1	190.733	57
137	1.1	191.867	61
139	1.1	226	11
141	1.1	231.667	17
140	1.1	232.333	77
144	1.1	233.2	72
141	1.1	251.7	91
141	1.1	255.767	72
142	1.1	258.767	81
141	1.1	265.267	76
142	1.1	277.567	80
144	1.1	296.067	80
137	1.1	309.233	72
143	1.1	313.833	42
140	1.1	328.8	49
143	1.1	330.333	24
138	1.1	331.167	25
131	1.1	341.767	75
139	1.1	378.1	85
140	1.1	385.4	57
142	1.1	391.033	77
141	1.1	394.967	37
140	1.1	395.467	7
139	1.1	401.8	59
142	1.1	408.8	10
137	1.1	411.333	41
140	1.1	416.4	17
140	1.1	432.8	20
142	1.13333	1.9	77
138	1.13333	3.7	47
144	1.13333	14.5	50
141	1.13333	16.3	57
143	1.13333	20.8	56
140	1.13333	25.4667	59
139	1.13333	27.4	33
141	1.13333	40.6333	17
137	1.13333	53.7667	80
141	1.13333	56.4333	73
143	1.13333	67.2	70
146	1.13333	76.9333	94
141	1.13333	88.1667	18
142	1.13333	110.933	77
145	1.13333	117.5	22
140	1.13333	131.233	66
141	1.13333	137.9	52
140	1.13333	141.9	87
140	1.13333	157.967	69
141	1.13333	187.7	69
140	1.13333	187.933	30
137	1.13333	195.2	77
141	1.13333	208.833	51
144	1.13333	220.3	74
143	1.13333	257.633	73
141	1.13333	263	83
143	1.13333	263.033	85
140	1.13333	269.167	50
140	1.13333	321	33
141	1.13333	353.2	51
126	1.13333	359.4	65
137	1.13333	372.8	85
133	1.13333	378.167	83
145	1.13333	378.767	85
143	1.13333	389	66
138	1.13333	391.633	43
144	1.13333	407.6	58
141	1.13333	411.9	50
148	1.13333	446.8	66
141	1.13333	446.9	81
144	1.13333	449.167	27
140	1.13333	471.3	59
140	1.13333	472.3	28
143	1.13333	475.067	1
142	1.16667	2.5	41
138	1.16667	3.8	64
133	1.16667	28.5333	39
141	1.16667	31.0667	51
143	1.16667	40.6	73
140	1.16667	47.8333	51
143	1.16667	51.9333	26
141	1.16667	56.9333	39
143	1.16667	64.8	60
142	1.16667	69.6333	64
142	1.16667	75.2667	60
142	1.16667	75.3333	61
145	1.16667	83.8	85
140	1.16667	84.9333	55
140	1.16667	85.3667	73
137	1.16667	88.5333	8
136	1.16667	98.1	12
142	1.16667	108.2	72
143	1.16667	111.333	85
142	1.16667	128.833	70
140	1.16667	129.967	68
141	1.16667	132.233	74
140	1.16667	191.5	69
143	1.16667	273.833	74
144	1.16667	273.833	74
139	1.16667	277.8	59
142	1.16667	293.267	18
142	1.16667	308.9	37
141	1.16667	319.133	43
139	1.16667	319.867	90
141	1.16667	327.767	8
145	1.16667	336	17
140	1.16667	347	76
140	1.16667	357.367	71
140	1.16667	365.667	53
138	1.16667	381.167	12
132	1.16667	390.7	86
141	1.16667	391.8	72
141	1.16667	398.033	16
138	1.16667	410.2	36
138	1.16667	411.167	56
141	1.16667	415.033	12
139	1.16667	415.5	20
141	1.16667	442.9	41
141	1.16667	444.333	38
141	1.16667	462.033	18
141	1.2	5.53333	53
139	1.2	31.1667	70
141	1.2	38.2667	25
138	1.2	43.6	71
141	1.2	44.0333	37
139	1.2	50.5	58
145	1.2	53.9667	71
139	1.2	59.8667	65
141	1.2	64.2	83
138	1.2	74.6	34
133	1.2	75.4333	68
139	1.2	86.8667	72
142	1.2	103.667	66
139	1.2	115.633	12
132	1.2	120.733	43
142	1.2	125.933	80
140	1.2	128.667	86
141	1.2	128.7	49
140	1.2	129.833	87
138	1.2	137.7	40
140	1.2	139.933	40
142	1.2	146.633	71
143	1.2	193.433	78
141	1.2	196.667	68
144	1.2	203.567	10
139	1.2	218.9	59
138	1.2	223.8	77
143	1.2	231.933	43
142	1.2	248.3	61
144	1.2	255.1	21
139	1.2	267.533	50
142	1.2	288.533	72
128	1.2	297.4	70
138	1.2	302.467	23
141	1.2	320.167	36
140	1.2	329.767	75
141	1.2	337.4	17
142	1.2	342.633	79
141	1.2	348.1	64
143	1.2	373.867	86
140	1.2	381.6	10
138	1.2	385.633	18
139	1.2	395.367	67
141	1.2	398.367	34
147	1.2	412.633	68
137	1.2	415.4	19
142	1.2	417	21
139	1.2	437.733	25
141	1.2	440.433	6
143	1.2	466.467	31
140	1.2	467.167	72
137	1.2	477.867	28
141	1.23333	2.46667	55
139	1.23333	2.76667	54
144	1.23333	3.7	63
139	1.23333	21.8333	75
139	1.23333	36.0333	55
140	1.23333	36.4667	42
140	1.23333	42.7667	20
140	1.23333	58.5667	72
142	1.23333	63.3333	75
138	1.23333	66.5	65
141	1.23333	67.5333	55
139	1.23333	92.1333	29
138	1.23333	107.833	12
141	1.23333	115.667	47
143	1.23333	154.333	86
142	1.23333	155.033	2
133	1.23333	174.567	74
139	1.23333	209.4	18
141	1.23333	215.2	73
140	1.23333	215.733	55
140	1.23333	227.233	33
136	1.23333	229.633	8
139	1.23333	230.633	65
132	1.23333	257.333	69
146	1.23333	258.767	69
141	1.23333	271.633	67
139	1.23333	273.233	57
141	1.23333	273.567	53
143	1.23333	279.833	72
139	1.23333	289.333	15
139	1.23333	322.233	76
140	1.23333	322.933	32
142	1.23333	327.067	81
141	1.23333	404.7	37
137	1.23333	410.9	28
140	1.23333	417.767	79
143	1.23333	419.9	66
139	1.23333	431.7	86
143	1.23333	432.8	17
141	1.23333	432.8	17
131	1.23333	439.567	83
143	1.23333	456.233	21
138	1.23333	456.967	71
140	1.26667	1.63333	67
141	1.26667	2.56667	39
141	1.26667	52.1	59
142	1.26667	54.0667	33
146	1.26667	57.4667	49
138	1.26667	86.6	8
137	1.26667	89.9333	74
138	1.26667	93.2333	4
137	1.26667	112.167	65
140	1.26667	121.4	62
140	1.26667	138	71
146	1.26667	140.267	72
140	1.26667	140.667	3
143	1.26667	146.533	62
143	1.26667	202.367	23
143	1.26667	205	89
143	1.26667	212.633	86
141	1.26667	220.233	74
141	1.26667	246.367	11
139	1.26667	273.9	72
140	1.26667	286.567	68
139	1.26667	295.333	21
145	1.26667	304.367	16
141	1.26667	313.6	49
142	1.26667	324.5	39
144	1.26667	327.533	72
141	1.26667	348	70
144	1.26667	350.1	15
141	1.26667	376.633	55
140	1.26667	381.967	73
138	1.26667	382.2	17
138	1.26667	383.733	60
140	1.26667	417.3	7
139	1.26667	435.333	40
142	1.26667	443.167	70
140	1.26667	455.4	46
142	1.26667	455.733	41
143	1.26667	458.433	53
141	1.26667	459.533	55
142	1.26667	460.367	50
141	1.26667	463	39
143	1.3	1.8	67
138	1.3	1.96667	66
140	1.3	2.13333	83
142	1.3	2.6	17
141	1.3	3.2	77
138	1.3	18.2333	72
146	1.3	22.9	55
140	1.3	41.6	36
141	1.3	44.3	55
142	1.3	54	33
138	1.3	55.8333	49
140	1.3	56.8333	72
144	1.3	57.8	59
137	1.3	59.8	56
138	1.3	69	70
135	1.3	78.9	46
139	1.3	87.3333	47
144	1.3	98.2667	71
141	1.3	98.7	63
138	1.3	130.333	54
137	1.3	143.833	62
142	1.3	146.267	62
142	1.3	149.567	72
142	1.3	155.867	36
136	1.3	175.5	90
135	1.3	178.4	73
140	1.3	187.6	8
142	1.3	194.467	57
142	1.3	211.9	54
138	1.3	229	40
135	1.3	229.267	76
142	1.3	231.833	59
141	1.3	235.833	57
129	1.3	253.267	75
137	1.3	254.667	79
141	1.3	263.167	65
139	1.3	279.733	64
142	1.3	293.5	63
141	1.3	293.967	56
137	1.3	306.267	69
142	1.3	334.4	32
144	1.3	380.3	42
142	1.3	386.233	12
136	1.3	387.867	33
141	1.3	393.467	20
141	1.3	396.833	37
139	1.3	407.4	40
142	1.3	431.767	23
137	1.33333	1.3	73
145	1.33333	2.1	58
136	1.33333	2.36667	62
140	1.33333	6.83333	59
140	1.33333	19.3	18
145	1.33333	38.8667	17
138	1.33333	45.1	8
142	1.33333	46.2333	57
139	1.33333	51.5	56
142	1.33333	61.6333	51
140	1.33333	68.5333	63
143	1.33333	77.1	62
141	1.33333	82.9333	69
141	1.33333	93.0333	48
141	1.33333	99.6333	52
142	1.33333	111.533	45
141	1.33333	126.7	67
143	1.33333	128.633	69
148	1.33333	145	11
143	1.33333	146.233	80
139	1.33333	154.933	53
143	1.33333	155.333	40
142	1.33333	158.933	59
144	1.33333	166.3	83
140	1.33333	192.167	43
129	1.33333	208.167	74
142	1.33333	209.833	70
139	1.33333	216.1	41
141	1.33333	223.333	15
139	1.33333	262.633	70
139	1.33333	266.167	63
141	1.33333	268	80
143	1.33333	288.867	51
142	1.33333	302.367	74
145	1.33333	328.567	18
140	1.33333	352	8
140	1.33333	368.9	29
144	1.33333	387.3	59
140	1.33333	395.6	8
144	1.33333	396.967	58
143	1.33333	404.3	57
142	1.33333	413.833	86
139	1.33333	414.767	13
142	1.33333	422.967	52
136	1.33333	430.167	59
130	1.33333	434.833	82
141	1.33333	439.967	63
141	1.36667	1.9	34
145	1.36667	2.2	66
146	1.36667	2.36667	77
141	1.36667	2.5	47
135	1.36667	2.73333	61
142	1.36667	8.4	58
138	1.36667	18.5	8
140	1.36667	18.9667	40
141	1.36667	45	40
144	1.36667	63.9333	68
143	1.36667	66.4333	21
143	1.36667	79.5667	69
142	1.36667	83.2	60
143	1.36667	85.6667	69
143	1.36667	88.0333	41
143	1.36667	88.5333	71
136	1.36667	101	55
141	1.36667	108.967	13
139	1.36667	111.2	82
137	1.36667	111.233	94
144	1.36667	117.4	79
144	1.36667	135.067	17
140	1.36667	137.6	11
140	1.36667	138.433	81
136	1.36667	143.467	79
135	1.36667	143.467	79
137	1.36667	164.533	44
144	1.36667	184.667	72
141	1.36667	190.633	93
142	1.36667	218.3	72
143	1.36667	233.267	84
138	1.36667	236.067	12
142	1.36667	238.933	89
139	1.36667	241.967	75
136	1.36667	244.833	94
136	1.36667	249.367	78
141	1.36667	260.133	66
141	1.36667	260.267	78
140	1.36667	271.567	34
135	1.36667	276.033	65
140	1.36667	277.7	8
141	1.36667	282.833	68
145	1.36667	284.267	71
140	1.36667	315.933	67
140	1.36667	320.267	53
140	1.36667	346.267	61
141	1.36667	351.733	35
141	1.36667	358.767	71
138	1.36667	369.367	84
137	1.36667	379.767	49
143	1.36667	393.5	44
138	1.36667	399.533	39
140	1.36667	402.333	19
142	1.36667	411.1	29
139	1.36667	411.3	8
142	1.36667	414.533	49
142	1.36667	416.033	47
135	1.36667	419.967	29
139	1.36667	421.033	19
139	1.36667	422.7	9
140	1.36667	449.2	61
139	1.36667	452.133	59
139	1.36667	464.267	2
141	1.36667	472.567	16
144	1.36667	479.633	41
141	1.4	2.73333	73
141	1.4	12.5	54
140	1.4	13.0667	57
139	1.4	24.1	59
141	1.4	39.5	27
143	1.4	40.8667	75
141	1.4	41.2	49
144	1.4	53.8333	66
142	1.4	57.1333	50
138	1.4	61.3	49
141	1.4	70.0333	64
144	1.4	78.4333	61
139	1.4	79.8667	68
137	1.4	87.5667	50
133	1.4	96.6	72
141	1.4	111.733	73
141	1.4	113.167	80
143	1.4	139.233	68
139	1.4	152.4	70
143	1.4	160.2	67
139	1.4	165.733	68
134	1.4	166.2	55
142	1.4	170.833	73
140	1.4	218.567	60
141	1.4	218.567	60
138	1.4	225.967	77
141	1.4	231.367	55
137	1.4	232.7	75
140	1.4	250.267	69
142	1.4	266.9	73
141	1.4	267.633	44
140	1.4	269.067	60
139	1.4	270	63
146	1.4	275.8	82
141	1.4	311.767	68
136	1.4	348.733	75
141	1.4	349.967	67
142	1.4	351.5	91
142	1.4	375.6	55
143	1.4	400.667	20
139	1.4	446.067	83
142	1.4	467.1	30
141	1.43333	1.9	57
140	1.43333	3.63333	54
144	1.43333	6.6	67
133	1.43333	13.7667	85
142	1.43333	27.1667	66
142	1.43333	28.4	57
142	1.43333	42.1667	51
140	1.43333	43.8667	17
142	1.43333	63.4667	56
141	1.43333	72.2333	17
142	1.43333	74.1	64
138	1.43333	77.8	75
137	1.43333	85.0667	26
134	1.43333	87.5333	80
140	1.43333	90.5667	47
140	1.43333	93.1667	66
135	1.43333	96.6667	86
138	1.43333	114.833	22
140	1.43333	131.9	72
141	1.43333	137.533	36
138	1.43333	137.533	36
141	1.43333	141.633	52
138	1.43333	142.9	4
140	1.43333	145.533	53
142	1.43333	161.567	81
141	1.43333	161.567	81
140	1.43333	161.7	43
143	1.43333	165.867	61
140	1.43333	178.467	75
140	1.43333	182.567	72
140	1.43333	186.133	34
143	1.43333	189.867	81
140	1.43333	230.3	66
141	1.43333	240.5	46
142	1.43333	251	42
144	1.43333	262.367	71
141	1.43333	271.567	48
139	1.43333	283.6	10
131	1.43333	344.967	82
143	1.43333	397.4	58
144	1.43333	401.267	76
131	1.43333	402.167	77
141	1.43333	414.533	18
142	1.43333	419.267	64
138	1.43333	439.967	28
142	1.43333	445.067	46
139	1.43333	456.6	31
142	1.43333	457.533	82
140	1.43333	465.433	54
139	1.46667	1.83333	71
141	1.46667	2.33333	77
137	1.46667	15.2667	51
137	1.46667	29.5	14
143	1.46667	35.1667	67
140	1.46667	38.9333	53
141	1.46667	45.9667	43
142	1.46667	50.9	55
135	1.46667	52.2667	75
143	1.46667	53.8667	58
140	1.46667	58.8667	83
142	1.46667	70.6333	75
138	1.46667	75.4667	36
139	1.46667	80.3	42
143	1.46667	83.0667	54
138	1.46667	94.0667	63
140	1.46667	115.8	9
143	1.46667	117.033	49
142	1.46667	117.1	71
133	1.46667	120.533	66
141	1.46667	120.633	79
144	1.46667	128.367	79
138	1.46667	129.533	58
142	1.46667	154.467	57
145	1.46667	155.333	55
143	1.46667	171.9	68
137	1.46667	190.633	75
136	1.46667	213.1	74
144	1.46667	213.4	77
144	1.46667	220	65
140	1.46667	253.767	64
140	1.46667	253.767	64
140	1.46667	271.967	73
140	1.46667	300.267	57
141	1.46667	303.967	16
140	1.46667	317.267	63
141	1.46667	340.633	73
140	1.46667	340.633	73
138	1.46667	350.6	36
144	1.46667	350.833	73
140	1.46667	368.2	83
144	1.46667	369.467	20
142	1.46667	377.367	83
140	1.46667	391.833	82
142	1.46667	403.3	21
136	1.46667	406.5	58
142	1.46667	408.833	10
135	1.46667	413.533	84
137	1.46667	415.4	15
144	1.46667	426.667	17
142	1.46667	437.767	65
142	1.46667	460.667	33
141	1.5	2.06667	74
144	1.5	2.1	77
144	1.5	4.53333	72
143	1.5	18.2667	42
138	1.5	51.9	78
142	1.5	61.9	63
138	1.5	70.4	67
139	1.5	88.6333	92
139	1.5	89.0667	59
138	1.5	97.6	58
129	1.5	102.8	80
140	1.5	105.733	13
139	1.5	106.1	73
141	1.5	109.267	70
143	1.5	128.433	54
143	1.5	131.033	66
136	1.5	138.967	72
142	1.5	141.267	54
146	1.5	147.833	79
143	1.5	166.333	68
140	1.5	186	14
140	1.5	188.033	73
138	1.5	193.4	93
141	1.5	194.2	61
141	1.5	223.967	71
140	1.5	227.433	14
142	1.5	238.633	43
143	1.5	253.467	44
139	1.5	272.867	67
133	1.5	293.933	73
145	1.5	306.633	8
140	1.5	310.7	36
142	1.5	310.8	71
143	1.5	311.867	62
139	1.5	311.967	54
143	1.5	340.567	44
138	1.5	376.7	25
141	1.5	392.467	66
138	1.5	401.467	46
139	1.5	407.833	47
142	1.5	409.533	16
140	1.5	419.233	58
137	1.5	427.3	62
138	1.5	440.867	53
139	1.5	443.433	34
139	1.5	443.533	32
143	1.5	445.533	89
138	1.5	446.8	51
145	1.5	462.6	33
144	1.5	479.633	60
146	1.53333	1.16667	74
141	1.53333	26.2667	67
140	1.53333	28.2333	33
140	1.53333	28.7667	54
143	1.53333	40.5333	44
140	1.53333	48.2667	18
143	1.53333	56.3333	72
135	1.53333	59.3	24
141	1.53333	61.8333	78
145	1.53333	65.5	58
138	1.53333	69.5333	65
144	1.53333	69.7	46
145	1.53333	72.8333	70
140	1.53333	73.9333	71
146	1.53333	73.9667	68
139	1.53333	74.6	82
144	1.53333	77.9333	74
142	1.53333	78.5333	57
148	1.53333	82.5333	68
134	1.53333	87.0333	88
146	1.53333	88.2667	61
144	1.53333	91.7333	48
141	1.53333	91.8667	81
140	1.53333	93.9333	39
138	1.53333	99	65
135	1.53333	115.533	76
136	1.53333	122.4	65
143	1.53333	133.7	60
141	1.53333	138.533	64
138	1.53333	166.433	73
141	1.53333	186.4	16
138	1.53333	187.733	53
140	1.53333	217.1	53
141	1.53333	243.267	27
140	1.53333	248.533	63
132	1.53333	250.633	54
144	1.53333	253.4	79
140	1.53333	271.533	69
140	1.53333	285.6	43
142	1.53333	290.767	75
141	1.53333	300.7	65
143	1.53333	308.267	74
139	1.53333	309.2	66
139	1.53333	329.733	62
138	1.53333	329.733	62
141	1.53333	331.967	35
142	1.53333	340.267	59
142	1.53333	344.833	51
141	1.53333	388.667	11
137	1.53333	392.8	51
139	1.53333	393.3	61
146	1.53333	400.6	71
140	1.53333	401.933	67
135	1.53333	405	42
143	1.53333	415.1	15
139	1.53333	421.6	58
141	1.53333	426.433	92
139	1.53333	448.467	47
144	1.53333	462.8	57
145	1.53333	466.133	33
136	1.53333	469.333	90
139	1.53333	471.233	9
140	1.56667	19.6667	56
144	1.56667	29.3	79
144	1.56667	33.5333	61
145	1.56667	34.5	66
143	1.56667	37.8333	57
137	1.56667	42.6	78
142	1.56667	43.9	64
140	1.56667	49.8	15
140	1.56667	52.3	60
139	1.56667	76.8	80
140	1.56667	80.3	62
143	1.56667	81.1667	65
141	1.56667	82.3	69
141	1.56667	83.6667	62
140	1.56667	88.2333	73
140	1.56667	91.8333	54
138	1.56667	97.1667	60
144	1.56667	112.167	68
138	1.56667	123.233	67
143	1.56667	124.967	69
144	1.56667	133.2	52
141	1.56667	142.633	68
138	1.56667	146.567	51
139	1.56667	147.4	60
138	1.56667	175.5	62
142	1.56667	177.7	64
143	1.56667	181.567	49
141	1.56667	189.833	77
140	1.56667	195.3	74
141	1.56667	210.4	63
141	1.56667	216.967	80
138	1.56667	217.967	55
139	1.56667	232.467	72
137	1.56667	235.2	33
140	1.56667	239.3	74
142	1.56667	243.6	76
140	1.56667	243.967	36
142	1.56667	280.4	33
142	1.56667	295.6	79
139	1.56667	317.667	41
141	1.56667	330.1	43
141	1.56667	348.4	21
141	1.56667	348.9	46
144	1.56667	351.933	22
142	1.56667	356.067	77
142	1.56667	378.1	54
141	1.56667	385.1	23
140	1.56667	402.067	39
140	1.56667	411.233	69
142	1.56667	436.533	8
141	1.56667	444.7	20
141	1.56667	447.667	52
139	1.56667	456	68
131	1.56667	476.167	81
141	1.6	1.43333	67
135	1.6	2.16667	71
143	1.6	4.36667	66
143	1.6	13.1667	18
140	1.6	25.8333	29
143	1.6	27.3667	72
143	1.6	42	13
141	1.6	44.2667	28
143	1.6	62.3667	54
140	1.6	66.3667	46
131	1.6	67.0333	77
140	1.6	86.8667	48
138	1.6	91.5333	60
142	1.6	101.1	35
143	1.6	101.567	31
141	1.6	126.8	75
138	1.6	139.067	17
137	1.6	153.567	87
141	1.6	207.267	15
139	1.6	225.967	80
145	1.6	226.6	49
141	1.6	230.867	66
138	1.6	263.467	66
134	1.6	268.933	45
146	1.6	271.1	20
141	1.6	275.433	49
136	1.6	276.6	62
138	1.6	286.133	91
140	1.6	308.967	62
143	1.6	333.3	68
142	1.6	341.333	66
139	1.6	348.533	49
135	1.6	349.8	70
142	1.6	350.733	56
140	1.6	352.3	85
137	1.6	354.5	76
141	1.6	370.8	90
138	1.6	380.433	53
137	1.6	402.867	4
143	1.6	407.033	69
141	1.6	420.367	18
139	1.6	427.5	19
142	1.6	434.767	16
144	1.6	446.767	45
138	1.6	448.7	36
142	1.6	452.133	29
134	1.6	454.3	49
141	1.6	456.567	53
139	1.6	458.8	58
141	1.6	467.033	5
143	1.6	470.4	22
134	1.63333	3.1	60
140	1.63333	6.83333	72
142	1.63333	11.1333	40
138	1.63333	25.2667	86
143	1.63333	42.6667	47
137	1.63333	52.9333	15
139	1.63333	53.5	52
141	1.63333	62.1	58
142	1.63333	74.7	51
140	1.63333	76.3667	61
141	1.63333	77.8667	54
143	1.63333	81.9333	49
141	1.63333	92.2333	41
139	1.63333	92.8667	46
137	1.63333	96.4	63
143	1.63333	99.3667	34
136	1.63333	100.733	72
139	1.63333	107.5	48
139	1.63333	111.333	70
142	1.63333	117.7	64
139	1.63333	118.1	87
140	1.63333	143.867	15
137	1.63333	188.933	61
142	1.63333	191.9	66
139	1.63333	207.367	75
138	1.63333	211.067	10
140	1.63333	217.1	70
140	1.63333	218.8	62
141	1.63333	237.3	88
137	1.63333	242.767	80
141	1.63333	243.633	80
142	1.63333	248.967	77
139	1.63333	252.033	68
143	1.63333	266.633	84
141	1.63333	272.633	72
141	1.63333	295.667	22
137	1.63333	315.567	61
142	1.63333	316.667	64
135	1.63333	321.7	54
138	1.63333	343.433	55
141	1.63333	359.433	67
139	1.63333	371.033	24
134	1.63333	375.333	90
142	1.63333	393.967	18
139	1.63333	401.133	20
143	1.63333	403.433	44
142	1.63333	415.733	35
144	1.63333	419.3	54
139	1.63333	422.4	81
139	1.63333	423.7	54
140	1.63333	431.967	45
138	1.63333	466.967	57
142	1.63333	467.167	25
139	1.66667	1.46667	63
144	1.66667	2.6	67
142	1.66667	2.73333	77
141	1.66667	2.83333	50
142	1.66667	3	57
143	1.66667	6.26667	47
144	1.66667	17.8667	47
143	1.66667	20.5333	43
144	1.66667	21.7667	21
144	1.66667	43.8333	59
143	1.66667	52.3667	52
142	1.66667	58.9	51
140	1.66667	60.4333	22
141	1.66667	65	17
144	1.66667	65.3667	42
143	1.66667	66.6333	62
142	1.66667	67.2667	68
143	1.66667	71.6333	74
140	1.66667	78.5667	71
138	1.66667	82.6	22
140	1.66667	94.5333	70
143	1.66667	94.9667	50
137	1.66667	97.5333	89
136	1.66667	103.533	33
144	1.66667	118.833	80
139	1.66667	150.8	70
139	1.66667	159.2	77
138	1.66667	166.633	58
143	1.66667	191.767	45
142	1.66667	193.033	53
141	1.66667	199.133	59
141	1.66667	207.8	6
140	1.66667	211.767	22
137	1.66667	213.333	25
144	1.66667	213.967	59
144	1.66667	223.367	69
142	1.66667	233.7	31
142	1.66667	240.9	25
141	1.66667	241.6	33
140	1.66667	247.067	60
141	1.66667	247.067	60
140	1.66667	248.867	63
135	1.66667	260.667	64
142	1.66667	261.9	80
140	1.66667	269.333	68
136	1.66667	271.167	40
133	1.66667	283.1	45
139	1.66667	290.1	65
138	1.66667	290.767	88
140	1.66667	297.1	19
140	1.66667	303.633	45
131	1.66667	311.967	85
143	1.66667	320.367	41
144	1.66667	340.967	72
139	1.66667	341.1	75
138	1.66667	342.067	73
137	1.66667	342.833	73
142	1.66667	347.1	57
140	1.66667	351.967	75
142	1.66667	404.8	9
142	1.66667	412.567	48
139	1.66667	416.333	38
142	1.66667	418.3	63
141	1.66667	418.967	47
142	1.66667	419.767	73
140	1.66667	421.833	42
141	1.66667	422	18
138	1.66667	440.567	6
145	1.66667	442.633	45
128	1.66667	450.6	42
143	1.66667	476.6	24
141	1.7	2.6	65
138	1.7	12.4667	47
141	1.7	35.6	67
142	1.7	44.3	65
140	1.7	47	35
138	1.7	53.9667	38
140	1.7	56.1667	31
141	1.7	60.3333	77
141	1.7	71.1	56
142	1.7	75.7667	54
138	1.7	79.2333	77
139	1.7	82.6	65
141	1.7	91.5	61
142	1.7	97.6333	41
146	1.7	100.367	58
143	1.7	101.533	70
142	1.7	115.467	47
140	1.7	125.433	78
143	1.7	130.433	71
140	1.7	134	64
140	1.7	149.467	18
144	1.7	155.467	82
139	1.7	157.767	52
142	1.7	159.5	81
141	1.7	159.5	81
141	1.7	168.8	10
138	1.7	181.4	9
138	1.7	183.767	17
139	1.7	193.533	78
144	1.7	208.833	47
133	1.7	227.833	73
144	1.7	237.967	58
139	1.7	239.5	87
139	1.7	254.033	77
141	1.7	254.033	77
141	1.7	256.567	67
140	1.7	257.3	38
139	1.7	258.133	79
127	1.7	260.267	89
137	1.7	268.133	24
144	1.7	273.067	82
144	1.7	284.167	60
135	1.7	289.633	81
140	1.7	318.967	62
139	1.7	330	91
141	1.7	341.967	74
142	1.7	343.133	51
138	1.7	349.7	25
137	1.7	357.267	55
140	1.7	366.433	27
141	1.7	368.933	81
137	1.7	370.533	24
139	1.7	412.533	73
140	1.7	421.767	68
138	1.7	458.767	8
140	1.7	460.433	14
140	1.7	460.633	48
139	1.7	462.2	20
138	1.7	466.3	75
141	1.7	472.567	68
143	1.7	474.6	88
142	1.73333	2.4	60
138	1.73333	2.43333	54
144	1.73333	2.73333	55
138	1.73333	2.73333	23
138	1.73333	3.43333	28
137	1.73333	52.9667	45
141	1.73333	52.9667	77
144	1.73333	54.2667	45
143	1.73333	54.6333	5
137	1.73333	59.0667	50
142	1.73333	61.7667	35
142	1.73333	65.6	66
142	1.73333	75	11
138	1.73333	76.2333	60
143	1.73333	116.7	42
140	1.73333	117.9	29
145	1.73333	120.567	59
136	1.73333	125.067	78
142	1.73333	133.3	17
143	1.73333	136.3	74
143	1.73333	144	68
139	1.73333	146.867	32
142	1.73333	156.867	15
139	1.73333	161.133	79
140	1.73333	168.433	41
140	1.73333	184.1	82
142	1.73333	189.833	75
139	1.73333	199.667	72
146	1.73333	200.3	83
139	1.73333	200.4	71
138	1.73333	201.667	56
143	1.73333	223.1	19
136	1.73333	225.667	57
142	1.73333	230.067	76
143	1.73333	230.133	63
134	1.73333	236.967	83
142	1.73333	238.533	70
136	1.73333	239.7	34
146	1.73333	240.8	30
141	1.73333	243.567	44
144	1.73333	246.033	70
139	1.73333	251.5	84
141	1.73333	253.8	41
139	1.73333	257.5	30
139	1.73333	265	58
141	1.73333	267.167	24
144	1.73333	269.667	57
141	1.73333	280.033	34
143	1.73333	289.933	75
136	1.73333	290.4	86
140	1.73333	311.767	46
139	1.73333	314.4	74
138	1.73333	315.767	76
143	1.73333	325.233	39
130	1.73333	326.533	33
142	1.73333	330.8	11
143	1.73333	388.967	47
141	1.73333	391.367	45
139	1.73333	400.833	31
129	1.73333	406.833	85
128	1.73333	414.933	73
133	1.73333	419.467	100
142	1.73333	429.267	56
141	1.73333	436.433	26
140	1.73333	440.767	17
141	1.73333	455.367	5
139	1.73333	457.067	57
139	1.73333	459.067	47
144	1.76667	0.366667	54
142	1.76667	2.46667	69
137	1.76667	3.33333	67
139	1.76667	47.0333	51
139	1.76667	48.8333	55
139	1.76667	50	53
144	1.76667	51.8	83
137	1.76667	52.7667	30
136	1.76667	53.1667	67
141	1.76667	53.4333	52
141	1.76667	55.7667	45
138	1.76667	55.8	19
141	1.76667	59.0333	49
138	1.76667	59.5667	63
141	1.76667	76.8667	73
140	1.76667	85.1	37
136	1.76667	90.9667	71
140	1.76667	97	79
142	1.76667	97.4667	54
143	1.76667	98.3667	44
143	1.76667	105.667	77
141	1.76667	120.967	57
140	1.76667	135.1	51
139	1.76667	154.433	72
134	1.76667	159.033	82
141	1.76667	165.2	17
140	1.76667	176.833	10
141	1.76667	176.833	10
139	1.76667	181.7	56
146	1.76667	188.567	54
139	1.76667	198.033	85
143	1.76667	208	37
142	1.76667	209.733	32
141	1.76667	211.1	74
141	1.76667	255	43
139	1.76667	256.9	29
142	1.76667	277.533	15
133	1.76667	281.133	83
141	1.76667	287.767	77
143	1.76667	290.7	58
140	1.76667	291.533	76
148	1.76667	304.2	89
145	1.76667	353.433	67
141	1.76667	368	25
136	1.76667	376.133	77
140	1.76667	380.667	79
141	1.76667	380.9	20
139	1.76667	383.3	40
144	1.76667	403.2	54
141	1.76667	417.733	62
141	1.76667	419.5	44
140	1.76667	424.8	82
141	1.76667	424.933	15
143	1.76667	426.7	63
142	1.76667	430.267	78
143	1.76667	442.633	64
137	1.76667	452.367	55
140	1.76667	453.867	30
140	1.76667	466.567	17
140	1.76667	471.367	12
134	1.76667	473.667	82
138	1.8	2.33333	67
140	1.8	2.83333	57
135	1.8	2.93333	47
141	1.8	3.03333	61
139	1.8	25.6	85
140	1.8	25.8333	59
140	1.8	42.7	59
144	1.8	44.1333	55
130	1.8	45.5	71
140	1.8	50.5	42
145	1.8	54.9333	80
141	1.8	63	16
140	1.8	63.2	46
144	1.8	67.3333	68
146	1.8	71.7667	66
140	1.8	75.0333	61
139	1.8	76.8667	42
140	1.8	77.7667	53
141	1.8	85.2667	38
138	1.8	93.9	25
135	1.8	95.2333	53
142	1.8	95.3667	65
143	1.8	100.133	81
140	1.8	106.167	14
140	1.8	116.4	82
142	1.8	120.033	12
139	1.8	123.967	70
141	1.8	138.767	8
142	1.8	140.067	47
138	1.8	146.333	92
142	1.8	154.1	51
139	1.8	171.9	23
141	1.8	179.7	70
140	1.8	193.8	76
142	1.8	195.1	16
143	1.8	201.333	60
135	1.8	203.267	68
132	1.8	256.6	58
142	1.8	260.533	85
142	1.8	260.667	76
135	1.8	260.833	77
137	1.8	261.233	86
142	1.8	265.767	71
141	1.8	267.933	80
134	1.8	282.4	62
140	1.8	284.833	68
143	1.8	288.433	77
140	1.8	297.933	82
141	1.8	312.733	77
138	1.8	314.5	79
141	1.8	327.9	91
140	1.8	341.967	60
140	1.8	345.6	54
141	1.8	346.4	12
139	1.8	348.367	48
140	1.8	357.967	79
140	1.8	371.533	46
144	1.8	385	20
140	1.8	393.167	11
141	1.8	402.167	70
143	1.8	409.567	57
138	1.8	415.8	84
140	1.8	416.067	23
138	1.8	416.333	6
138	1.8	420.433	64
143	1.8	421.867	59
135	1.8	444.767	59
142	1.8	447.167	74
143	1.8	447.733	48
138	1.8	449.233	38
140	1.8	453.467	57
142	1.8	459.467	66
144	1.8	475.467	35
141	1.83333	29.6	60
129	1.83333	33.0333	58
139	1.83333	37.4333	74
131	1.83333	45.5333	67
140	1.83333	46.6	51
143	1.83333	47.7333	20
140	1.83333	49.7	74
141	1.83333	52.1333	54
142	1.83333	60.1	48
142	1.83333	60.6	35
143	1.83333	68.0667	11
130	1.83333	75.6	68
140	1.83333	76.3333	72
138	1.83333	78.7667	45
142	1.83333	82.8333	21
139	1.83333	87.2	59
144	1.83333	101.567	79
142	1.83333	101.567	49
144	1.83333	105.033	72
139	1.83333	109.3	8
134	1.83333	134.1	82
138	1.83333	155.633	25
139	1.83333	166.3	37
144	1.83333	188.767	62
140	1.83333	206.733	89
138	1.83333	211.767	74
144	1.83333	219.667	73
139	1.83333	222.367	73
143	1.83333	225.267	47
141	1.83333	230.1	68
140	1.83333	242.467	49
142	1.83333	243.8	46
141	1.83333	252.233	44
141	1.83333	255.067	73
142	1.83333	257.1	80
145	1.83333	258.1	84
141	1.83333	259.067	74
139	1.83333	264.4	57
143	1.83333	279.4	69
142	1.83333	292.067	57
140	1.83333	295.933	72
138	1.83333	306.1	68
141	1.83333	310.767	77
140	1.83333	311	75
143	1.83333	314.633	79
141	1.83333	325.733	81
141	1.83333	338.533	12
141	1.83333	347.367	53
141	1.83333	352	70
140	1.83333	360.633	29
138	1.83333	382.967	6
142	1.83333	388.467	16
141	1.83333	389.267	28
139	1.83333	394.3	9
138	1.83333	407.567	45
140	1.83333	423.667	82
141	1.83333	428.467	33
144	1.83333	436.5	42
141	1.83333	441.4	17
137	1.83333	443.633	47
140	1.83333	447.1	44
143	1.83333	449.133	74
142	1.86667	3.3	34
145	1.86667	14.7333	68
142	1.86667	17	25
143	1.86667	66.4667	72
137	1.86667	67.5333	61
143	1.86667	73.7333	72
140	1.86667	81.3333	78
141	1.86667	99.1333	43
140	1.86667	100.8	20
139	1.86667	104.9	64
141	1.86667	116.133	80
142	1.86667	122.133	76
142	1.86667	126.933	30
135	1.86667	128.533	79
144	1.86667	129.5	57
141	1.86667	134.5	57
140	1.86667	141.5	73
146	1.86667	148.1	47
138	1.86667	154.667	3
140	1.86667	155.533	63
130	1.86667	158.9	85
131	1.86667	160.367	77
139	1.86667	163.5	78
141	1.86667	167.567	5
140	1.86667	168.9	62
142	1.86667	183.267	19
139	1.86667	186.9	14
136	1.86667	188.633	81
131	1.86667	203.967	54
135	1.86667	212	63
130	1.86667	219.833	83
140	1.86667	222.833	77
140	1.86667	237.567	87
139	1.86667	249.5	59
139	1.86667	250.133	70
143	1.86667	251.5	90
136	1.86667	255.067	66
134	1.86667	259.167	79
141	1.86667	273.133	85
143	1.86667	283.6	41
134	1.86667	285.667	41
139	1.86667	289.767	74
141	1.86667	320.767	26
142	1.86667	325.1	81
138	1.86667	331.933	82
141	1.86667	333.667	37
141	1.86667	334.867	85
139	1.86667	338.233	4
141	1.86667	338.467	86
140	1.86667	347.133	49
141	1.86667	369.7	19
138	1.86667	379.633	39
139	1.86667	381.833	83
145	1.86667	389.5	88
142	1.86667	415.533	16
138	1.86667	416	36
139	1.86667	429.667	88
136	1.86667	431.133	24
138	1.86667	437.6	17
135	1.86667	445.733	14
141	1.86667	457.5	30
139	1.86667	473.5	6
141	1.86667	474.7	52
139	1.9	2.96667	47
138	1.9	4.3	52
144	1.9	12.2333	47
141	1.9	17.8333	85
140	1.9	19.5333	55
141	1.9	24.6	45
134	1.9	39.2667	86
143	1.9	43.5333	21
141	1.9	50.7	27
130	1.9	58.6667	74
143	1.9	62.4333	57
138	1.9	62.9333	64
143	1.9	69.4333	70
138	1.9	71.4	67
143	1.9	72.8	73
141	1.9	75.1	69
140	1.9	83.8	64
138	1.9	85.6667	62
143	1.9	89.9333	72
140	1.9	92.8667	82
140	1.9	96.2333	69
140	1.9	120.5	46
143	1.9	131.167	57
139	1.9	136.167	59
141	1.9	137.467	64
141	1.9	160.1	49
138	1.9	161	31
141	1.9	164.2	74
144	1.9	191.6	64
140	1.9	194.733	60
140	1.9	203.8	23
143	1.9	204.4	68
138	1.9	210.167	41
136	1.9	216.033	76
140	1.9	225.733	77
142	1.9	232.8	85
132	1.9	237	68
140	1.9	240.6	15
139	1.9	260.467	72
136	1.9	264.067	34
128	1.9	264.433	68
138	1.9	267.9	3
140	1.9	269.267	49
141	1.9	271.4	63
136	1.9	271.633	89
141	1.9	277.433	35
140	1.9	292.4	21
144	1.9	294.033	73
142	1.9	294.5	73
141	1.9	296.9	28
138	1.9	334.9	53
142	1.9	340.967	64
143	1.9	342.9	77
137	1.9	346.867	56
139	1.9	348.9	78
139	1.9	349.833	56
148	1.9	353.8	60
141	1.9	358.7	56
137	1.9	375.2	59
139	1.9	406.8	36
142	1.9	427.167	17
143	1.9	436.8	46
144	1.9	439.667	74
138	1.9	451	22
136	1.9	453.7	11
142	1.9	455.2	17
139	1.9	459.533	45
142	1.9	460.233	55
143	1.9	461.7	19
141	1.93333	2	71
144	1.93333	2.2	45
140	1.93333	13.7	57
144	1.93333	14.0667	69
140	1.93333	24.7	25
138	1.93333	25.2333	3
141	1.93333	25.8	70
140	1.93333	27.8667	56
144	1.93333	40.1667	85
135	1.93333	40.6333	59
144	1.93333	51.3	44
140	1.93333	61.7667	43
141	1.93333	69.4	21
[truncated: 49,919 more rows]
